# Supplementary material
Source: HighWire-hosted journal article supplement (https://bmjopen.bmj.com/content/15/4/e083686)
Supplement: inline-supplementary-material-3 [file inline-supplementary-material-3.xls]

## Sheet: Sheet1
Patient Number	Sex, 1:Men, 2:Women	Baseline Age, yrs	Baseline Ethanol consumption g/wk	Baseline Fatty liver 0/1	Baseline BMI, kg/m2	Baseline Waist circumference(WC), cm	Baseline WC≥90 in Men, ≥80 in Women 0/1	Baseline BMI≥25 0/1	Obesity phenotype 1-8	Follow up duration, days	Baseline ALT, IU/L	Baseline AST, IU/L	Baseline Body Weight, kg	Baseline Habit of exercise 0/1	Baseline GGT, IU/L	Baseline HDL-cholesterol, mg/dL	Baseline HDL-cholesterol, mmol/L	Baseline Total Cholesterol, mg/dL	Baseline Total Cholesterol, mmol/L	Baseline Triglycerides, mg/dL	Baseline Triglycerides, mmol/L	Baseline HbA1c, %	Baseline HbA1c, mmol/mol	Baseline Alcohol consumption, non:1, light:2, moderate:3, heavy:4	Baseline Smoking status, 1:never, 2:past, 3:current	Baseline Fasting plasma glucose, mg/dl	Baseline Fasting plasma glucose, mmol/L	Baseline Systolic blood pressure, mmHg	Baseline Diastolic blood pressure, mmHg	Incident DM 0/1
18773	0	42	1	0	13.7662	57	0	0	0	1106	12	16	38.9	0	14	59	1.52574	158	4.08588	75	0.84675	5.1	32.243	1	1	90	4.9959	104.5	67.5	0	8.12415
861	0	52	0	0	14.0727	49	0	0	0	4345	123	98	32.3	0	29	78.1	2.01967	173	4.47378	40	0.4516	4.4	24.592	1	1	51	2.83101	84.5	55	0	6.92756
5616	1	45	0	0	14.3065	59	0	0	1	4039	21	24	41.2	0	13	57.9	1.49729	179	4.62894	33	0.37257	4.9	30.057	1	1	89	4.94039	91	57.5	0	7.292
13350	0	50	0	0	14.3576	58.5	0	0	0	1820	12	24	35.3	0	13	70.9	1.83347	198	5.12028	57	0.64353	6.1	43.173	1	1	85	4.71835	98.5	60.5	0	7.79256
14340	0	38	1	0	14.4115	61	0	0	0	2274	15	21	40	0	13	91.4	2.3636	206	5.32716	53	0.59837	5.4	35.522	1	1	84	4.66284	102	68.5	0	7.70796
20707	0	37	0	0	14.4517	56	0	0	0	367	29	21	37.6	0	20	87	2.24982	184	4.75824	29	0.32741	5.4	35.522	1	1	90	4.9959	114.5	64.5	0	7.17396
7088	1	40	210	0	14.6678	69	0	0	1	1833	12	20	48	0	126	50.3	1.30076	178	4.60308	73	0.82417	5.2	33.336	3	3	97	5.38447	112.5	75	0	8.17202
1278	1	63	18	0	14.8008	61	0	0	1	1993	16	18	40.1	0	20	89.8	2.32223	246	6.36156	53	0.59837	4.9	30.057	1	2	99	5.49549	142.5	83	0	7.87226
13844	0	30	0	0	14.889	57.5	0	0	0	1426	16	18	36.7	1	15	44.5	1.15077	163	4.21518	56	0.63224	5.4	35.522	1	1	78	4.32978	94	58	0	7.68891
9580	0	40	1	0	14.8992	57	0	0	0	4043	9	10	33.3	0	10	54.8	1.41713	195	5.0427	94	1.06126	4.8	28.964	1	3	90	4.9959	98	64	0	8.34996
4353	0	39	1	0	14.9191	53	0	0	0	2890	11	16	32.9	0	7	41.3	1.06802	163	4.21518	75	0.84675	4.9	30.057	1	3	87	4.82937	90	61	0	8.09025
7894	0	48	154	0	14.9515	56.5	0	0	0	3944	31	38	35	0	20	78.8	2.03777	231	5.97366	128	1.44512	4.7	27.871	3	1	76	4.21876	100.5	67.5	0	8.48962
20550	0	36	12	0	15.0599	62	0	0	0	356	7	17	41.9	0	17	86	2.22396	187	4.83582	20	0.2258	5.3	34.429	1	1	96	5.32896	121	67	0	6.86693
4540	0	53	105	0	15.1909	53	0	0	0	1814	9	17	35.7	0	13	128.8	3.33077	253	6.54258	37	0.41773	5	31.15	2	1	90	4.9959	104	70.5	0	7.41758
177	0	63	0	0	15.2365	53.9	0	0	0	1836	15	20	33.6	0	8	47.6	1.23094	150	3.879	82	0.92578	5.2	33.336	1	1	86	4.77386	107.5	66	0	8.16792
20555	0	35	90	0	15.2689	59	0	0	0	334	8	13	36.4	0	18	73	1.88778	160	4.1376	30	0.3387	5.2	33.336	2	1	84	4.66284	115.5	73.5	0	7.13887
2089	1	44	2.8	0	15.277	66	0	0	1	3956	21	21	47	0	16	47.4	1.22576	158	4.08588	38	0.42902	4.9	30.057	1	1	78	4.32978	101	71.5	0	7.30115
8176	1	43	0	0	15.2793	67	0	0	1	1833	12	14	46.9	1	11	46.6	1.20508	188	4.86168	44	0.49676	4.8	28.964	1	2	97	5.38447	106.5	63.5	0	7.66575
2894	0	56	1	0	15.2978	55.5	0	0	0	2089	14	24	37.9	0	10	71.1	1.83865	181	4.68066	27	0.30483	5.758	39.4349	1	1	89	4.94039	107.5	67	0	7.09133
1770	0	58	0	0	15.3128	64.5	0	0	0	2729	13	21	35.1	0	15	69.7	1.80244	272	7.03392	32	0.36128	5.2	33.336	1	1	82	4.55182	110.5	70.5	0	7.17931
20670	0	39	0	0	15.3175	67	0	0	0	361	13	11	43.8	0	13	61	1.57746	153	3.95658	26	0.29354	5.3	34.429	1	1	94	5.21794	117	78	0	7.10824
16953	0	38	1	0	15.3371	59	0	0	0	1086	16	21	41.1	0	12	69	1.78434	221	5.71506	18	0.20322	5.5	36.615	1	1	81	4.49631	84.5	54.5	0	6.59167
16533	0	55	2.8	0	15.3372	57	0	0	0	1759	13	24	36.8	0	23	89	2.30154	278	7.18908	34	0.38386	5.5	36.615	1	1	101	5.60651	122	77.5	0	7.44833
15652	0	55	10.9667	0	15.3557	62	0	0	0	2227	19	23	41.2	0	18	102.7	2.65582	267	6.90462	60	0.6774	5.7	38.801	1	2	101	5.60651	156	87.5	0	8.01632
20598	1	41	126	0	15.3564	59.5	0	0	1	362	11	10	46.6	0	15	60	1.5516	187	4.83582	78	0.88062	5.4	35.522	2	2	102	5.66202	99	67	0	8.28853
11343	0	27	0	0	15.3638	59.5	0	0	0	3680	11	15	38.5	0	7	62.8	1.62401	132	3.41352	24	0.27096	4.432	24.9418	1	1	80	4.4408	96.5	62.5	0	6.86693
17135	0	28	0	0	15.3862	59.5	0	0	0	714	16	17	38.8	0	12	58	1.49988	156	4.03416	43	0.48547	4.8	28.964	1	1	71	3.94121	96	60.5	0	7.33073
20478	0	34	0	0	15.4161	71	0	0	0	340	13	13	44.5	0	9	92	2.37912	199	5.14614	20	0.2258	5.3	34.429	1	1	82	4.55182	116.5	68.5	0	6.7093
1149	0	45	0	0	15.4214	60	0	0	0	2604	15	16	36.1	0	10	63.6	1.6447	162	4.18932	24	0.27096	5	31.15	1	1	81	4.49631	95	64.5	0	6.87936
9555	0	40	0	0	15.4306	57	0	0	0	2548	14	15	37.6	0	9	75.1	1.94209	217	5.61162	83	0.93707	5	31.15	1	1	99	5.49549	105	71	0	8.32081
15862	0	45	27.3	0	15.4317	65	0	0	0	1565	13	17	40.9	0	14	65.6	1.69642	191	4.93926	48	0.54192	5.1	32.243	1	1	68	3.77468	128	75	0	7.39756
8865	0	27	0	0	15.4692	65	0	0	0	731	12	24	41.1	0	11	63	1.62918	215	5.5599	47	0.53063	4.9	30.057	1	2	83	4.60733	75.5	52.5	0	7.57584
3001	0	41	0	0	15.4864	56	0	0	0	1460	22	15	41.5	0	11	93.8	2.42567	217	5.61162	72	0.81288	4.9	30.057	1	1	88	4.88488	86	49	0	8.06086
14129	0	37	0	0	15.4874	59	0	0	0	368	17	20	41.3	0	12	45	1.1637	160	4.1376	37	0.41773	5	31.15	1	1	82	4.55182	92	63	0	7.32449
3821	0	51	0	0	15.5416	58.8	0	0	0	1294	15	17	38.7	0	10	58.4	1.51022	169	4.37034	19	0.21451	5.656	38.3201	1	1	82	4.55182	98	62.5	0	6.65801
16716	0	58	0	0	15.5499	59.5	0	0	0	1826	15	25	37.6	0	17	81	2.09466	197	5.09442	42	0.47418	5.4	35.522	1	1	95	5.27345	85	53	0	7.5984
15916	0	34	12	0	15.5587	60	0	0	0	446	11	15	42	0	11	75	1.9395	176	4.55136	36	0.40644	5.1	32.243	1	1	87	4.82937	107	60.5	0	7.35628
8793	1	35	18	0	15.5774	57.3	0	0	1	4304	7	10	43.6	0	19	69.9	1.80761	189	4.88754	66	0.74514	4.7	27.871	1	1	99	5.49549	106	64	0	8.09163
9927	0	38	1	0	15.5858	60	0	0	0	1135	22	23	39.8	0	16	73.6	1.9033	195	5.0427	47	0.53063	5.1	32.243	1	1	90	4.9959	138.5	90	0	7.65681
20502	0	34	0	0	15.5901	59	0	0	0	406	17	19	35.5	0	11	86	2.22396	168	4.34448	28	0.31612	5.1	32.243	1	1	95	5.27345	115.5	60.5	0	7.19293
1850	0	50	240.66	0	15.5936	58	0	0	0	237	18	12	37.9	0	29	89.1	2.30413	207	5.35302	44	0.49676	4.9	30.057	3	1	109	6.05059	91	57.5	0	7.78239
12529	0	34	1	0	15.5958	60	0	0	0	3298	13	17	38.1	0	10	59.2	1.53091	177	4.57722	23	0.25967	5	31.15	1	1	80	4.4408	90.5	61.5	0	6.82437
6197	1	40	126	0	15.6098	60	0	0	1	3171	12	18	43.9	1	14	59.4	1.53608	192	4.96512	52	0.58708	4.5	25.685	2	3	92	5.10692	101	68	0	7.77989
17298	0	43	1	0	15.6125	60	0	0	0	1546	38	40	37.8	0	17	135	3.4911	272	7.03392	30	0.3387	5.4	35.522	1	1	89	4.94039	86.5	57.5	0	7.19669
10981	0	40	1	0	15.6197	63	0	0	0	673	17	21	41.5	0	8	52.8	1.36541	152	3.93072	41	0.46289	5.35	34.9755	1	1	105	5.82855	122	76.5	0	7.67439
11272	1	51	1	0	15.627	64	0	0	1	2310	21	20	46.5	0	10	85.8	2.21879	218	5.63748	19	0.21451	5.044	31.6309	1	1	93	5.16243	106	68.5	0	6.78389
14032	0	44	0	0	15.6396	61	0	0	0	2946	11	16	41.4	0	11	70.6	1.82572	192	4.96512	40	0.4516	5.1	32.243	1	1	91	5.05141	125	70	0	7.50659
7096	1	34	1	0	15.6426	66	0	0	1	4368	10	13	52.5	0	11	59	1.52574	157	4.06002	27	0.30483	5.2	33.336	1	1	86	4.77386	89	55.5	0	7.05704
7541	0	33	17.5	0	15.6703	58.1	0	0	0	4454	13	16	36.3	0	9	67.1	1.73521	139	3.59454	40	0.4516	5.1	32.243	1	3	94	5.21794	88	54	0	7.53903
19887	0	60	90	0	15.6706	57	0	0	0	323	22	26	37.6	1	36	91	2.35326	210	5.4306	53	0.59837	5.9	40.987	2	1	102	5.66202	111.5	71.5	0	7.90212
14778	1	34	11	0	15.6786	60	0	0	1	1820	17	21	43.1	0	17	70.7	1.8283	215	5.5599	65	0.73385	5.5	36.615	1	1	84	4.66284	122	77	0	7.91206
683	0	52	12	0	15.6831	64	0	0	0	1978	14	24	40.4	0	13	72	1.86192	231	5.97366	63	0.71127	5.4	35.522	1	1	88	4.88488	90.5	56	0	7.92732
10846	0	36	60	0	15.689	63.2	0	0	0	3741	11	17	42.3	0	9	70.6	1.82572	170	4.3962	27	0.30483	4.636	27.1715	1	1	85	4.71835	95.5	57	0	7.04534
6830	0	59	22	0	15.6931	61	0	0	0	2687	18	27	37.8	0	48	115.9	2.99717	232	5.99952	54	0.60966	5.4	35.522	1	1	104	5.77304	104.5	67	0	7.94023
14605	0	40	1	0	15.7029	60.5	0	0	0	2187	16	17	39.3	0	22	70.8	1.83089	175	4.5255	28	0.31612	5.2	33.336	1	1	97	5.38447	109	69	0	7.21377
4852	0	52	154	0	15.7325	64	0	0	0	4357	26	30	45.2	0	55	91.3	2.36102	226	5.84436	58	0.65482	4.5	25.685	3	1	89	4.94039	123.5	78.5	0	7.85593
18991	0	31	0	0	15.7571	61	0	0	0	973	8	9	41.2	0	10	61	1.57746	143	3.69798	43	0.48547	4.9	30.057	1	1	89	4.94039	92.5	56.5	0	7.55669
664	0	53	0	0	15.7618	56.4	0	0	0	1705	20	26	39	0	14	65.9	1.70417	197	5.09442	70	0.7903	5.2	33.336	1	1	90	4.9959	125	68	0	8.05516
16007	0	38	0	0	15.7624	63	0	0	0	586	13	20	39.2	0	12	85	2.1981	184	4.75824	24	0.27096	5.1	32.243	1	1	81	4.49631	83	55.5	0	6.87936
1168	0	37	0	0	15.7946	63	0	0	0	3024	12	18	45.7	0	9	44.1	1.14043	139	3.59454	61	0.68869	5.044	31.6309	1	1	86	4.77386	97	60	0	7.87207
6007	0	56	110	0	15.8244	60	0	0	0	1098	18	21	35.7	1	42	102.8	2.65841	195	5.0427	77	0.86933	5.6	37.708	2	1	84	4.66284	128.5	80.5	0	8.08148
15703	0	30	0	0	15.8337	63	0	0	0	2177	17	17	44	0	15	49	1.26714	128	3.31008	14	0.15806	4.9	30.057	1	1	93	5.16243	113	75	0	6.47851
19275	0	41	84	0	15.8756	62	0	0	0	1093	11	18	41.1	0	18	92	2.37912	157	4.06002	30	0.3387	5.2	33.336	2	1	99	5.49549	132.5	82	0	7.30317
13304	0	60	0	0	15.8808	62.3	0	0	0	2849	20	28	40.3	1	10	66.4	1.7171	201	5.19786	38	0.42902	5.9	40.987	1	1	91	5.05141	103.5	60.5	0	7.4553
4665	0	47	1	0	15.8823	57.4	0	0	0	4542	21	17	38.8	0	15	74.9	1.93691	180	4.6548	37	0.41773	4.9	30.057	1	1	89	4.94039	97.5	64	0	7.40641
15160	0	24	1	0	15.8828	63.5	0	0	0	427	18	16	39	0	13	74.3	1.9214	217	5.61162	59	0.66611	5.4	35.522	1	1	81	4.49631	109.5	69.5	0	7.77884
4364	1	58	0	0	15.8829	61.9	0	0	1	1793	35	24	39.6	0	11	77.8	2.01191	174	4.49964	66	0.74514	6	42.08	1	1	101	5.60651	75.5	48	0	8.11163
10491	0	35	0	0	15.9029	58.5	0	0	0	2894	14	14	39.7	0	8	44.5	1.15077	145	3.7497	27	0.30483	5.2	33.336	1	1	98	5.43998	86.5	55	0	7.18766
17656	0	35	1	0	15.9031	57	0	0	0	1625	12	19	39.6	0	7	63	1.62918	241	6.23226	60	0.6774	4.6	26.778	1	3	95	5.27345	110.5	65	0	7.95507
13732	1	39	1	0	15.9056	62.5	0	0	1	3011	16	20	44.2	0	19	49.9	1.29041	176	4.55136	63	0.71127	5.5	36.615	1	1	87	4.82937	98.5	70.5	0	7.9159
6682	1	42	36	0	15.918	65.9	0	0	1	4265	14	8	44.5	0	11	62	1.60332	194	5.01684	40	0.4516	4.8	28.964	1	2	94	5.21794	103	65	0	7.53903
8261	0	55	1	0	15.9202	60.5	0	0	0	4582	13	14	40.4	0	8	94	2.43084	225	5.8185	44	0.49676	5.4	35.522	1	1	93	5.16243	99.5	62	0	7.62364
5203	0	41	1	0	15.9262	58.5	0	0	0	3983	8	9	41.9	0	10	61.1	1.58005	198	5.12028	36	0.40644	5.6	37.708	1	1	80	4.4408	128	82	0	7.2724
5790	0	31	1	0	15.9298	62.2	0	0	0	2193	17	20	41.6	0	9	51.9	1.34213	151	3.90486	34	0.38386	4.9	30.057	1	1	85	4.71835	81	53.5	0	7.27586
19853	0	36	1	0	15.933	59	0	0	0	644	11	17	41.3	0	13	93	2.40498	183	4.73238	32	0.36128	5	31.15	1	1	86	4.77386	99.5	63	0	7.22694
1636	0	48	0	0	15.9396	60	0	0	0	702	18	18	40.5	1	20	50.2	1.29817	183	4.73238	45	0.50805	5	31.15	1	1	71	3.94121	101	63.5	0	7.3762
1800	0	58	27.3	0	15.9426	61	0	0	0	689	12	14	39.9	0	11	63.6	1.6447	193	4.99098	46	0.51934	5.7	38.801	1	1	98	5.43998	114	71	0	7.72046
9099	0	22	1	0	15.9435	57.8	0	0	0	1079	7	14	39.6	0	5	59.1	1.52833	134	3.46524	40	0.4516	4.8	28.964	1	1	76	4.21876	91.5	59	0	7.32647
17400	0	40	1	0	15.9438	57	0	0	0	1381	18	21	39	0	11	58	1.49988	177	4.57722	30	0.3387	5.1	32.243	1	1	83	4.60733	115	57	0	7.12689
19461	0	35	1	0	15.9495	69	0	0	0	732	14	25	41.6	0	9	113	2.92218	252	6.51672	21	0.23709	5.2	33.336	1	1	91	5.05141	84	50.5	0	6.86223
20360	0	36	0	0	15.9566	61	0	0	0	378	12	17	40.9	0	10	56	1.44816	153	3.95658	54	0.60966	5.2	33.336	1	1	91	5.05141	111.5	66	0	7.8067
7124	0	44	12	0	15.9635	50.8	0	0	0	4340	14	12	39.7	0	9	84.8	2.19293	223	5.76678	57	0.64353	5.2	33.336	1	1	83	4.60733	92.5	59	0	7.76874
11281	0	21	1	0	15.9637	63.5	0	0	0	1428	12	13	39.6	0	12	47.1	1.21801	139	3.59454	15	0.16935	4.942	30.5161	1	1	86	4.77386	107	64	0	6.46925
4955	0	44	0	0	15.9736	61.5	0	0	0	728	12	13	37.1	1	12	79.7	2.06104	217	5.61162	73	0.82417	5	31.15	1	1	76	4.21876	90	53	0	7.92805
19808	0	36	0	0	15.9819	60	0	0	0	763	14	16	45	0	13	77	1.99122	198	5.12028	86	0.97094	5.2	33.336	1	1	94	5.21794	116.5	70.5	0	8.30449
13990	0	37	0	0	15.982	61	0	0	0	2911	23	27	38.1	0	13	52.6	1.36024	158	4.08588	59	0.66611	5.5	36.615	1	1	89	4.94039	89.5	59.5	0	7.87303
20904	0	35	0	0	15.982	66	0	0	0	334	9	12	38.1	0	12	99	2.56014	251	6.49086	43	0.48547	5.5	36.615	1	1	91	5.05141	100	63	0	7.57891
20684	1	41	1	0	16.0053	68	0	0	1	336	8	11	53.6	0	13	91	2.35326	191	4.93926	48	0.54192	5.4	35.522	1	1	106	5.88406	134	72.5	0	7.84149
8631	0	46	1	0	16.0095	58.5	0	0	0	4341	16	21	36.6	1	8	71.9	1.85933	188	4.86168	45	0.50805	4.7	27.871	1	1	83	4.60733	89	60	0	7.53236
9683	0	49	0	0	16.0126	63	0	0	0	3977	6	12	43.7	0	9	50.6	1.30852	165	4.2669	74	0.83546	5	31.15	1	1	90	4.9959	98.5	61.5	0	8.11073
20321	0	25	1	0	16.0157	57	0	0	0	329	11	13	42.5	0	16	62	1.60332	156	4.03416	24	0.27096	5.5	36.615	1	1	96	5.32896	99	58.5	0	7.04925
7948	0	42	1	0	16.0166	61	0	0	0	800	12	12	40.9	0	9	48.6	1.2568	191	4.93926	66	0.74514	5	31.15	1	1	93	5.16243	73	49	0	8.02911
2944	0	56	87.5	0	16.0167	53.5	0	0	0	309	17	17	37.2	0	25	89.1	2.30413	225	5.8185	45	0.50805	5.2	33.336	2	1	89	4.94039	92.5	61	0	7.60215
16936	0	38	0	0	16.0195	57	0	0	0	796	13	20	37.5	0	7	92	2.37912	223	5.76678	10	0.1129	4.9	30.057	1	1	94	5.21794	94.5	62.5	0	6.15273
4566	0	49	0	0	16.0447	61	0	0	0	344	13	14	41.9	0	10	51.4	1.3292	157	4.06002	44	0.49676	5.5	36.615	1	1	81	4.49631	103	61	0	7.48549
8962	0	50	0	0	16.0547	58	0	0	0	2134	16	20	41.1	0	7	67	1.73262	223	5.76678	58	0.65482	5.6	37.708	1	1	91	5.05141	103	67	0	7.87816
7444	0	42	12	0	16.0557	54.2	0	0	0	380	14	11	41	0	9	64	1.65504	183	4.73238	40	0.4516	5.1	32.243	1	3	84	4.66284	91	56.5	0	7.42655
18799	1	37	168	0	16.0748	63.5	0	0	1	721	17	18	45.1	0	30	62	1.60332	196	5.06856	45	0.50805	5	31.15	3	1	96	5.32896	103	65	0	7.67786
20485	0	36	1	0	16.0872	58	0	0	0	339	12	18	38.5	0	11	77	1.99122	146	3.77556	22	0.24838	5.2	33.336	1	1	92	5.10692	116.5	74	0	6.91968
12621	1	59	0	0	16.09	64	0	0	1	1988	13	17	48.1	0	21	86.1	2.22655	214	5.53404	25	0.28225	5.4	35.522	1	2	91	5.05141	103.5	68	0	7.03659
15907	1	49	317.8	0	16.0926	65.5	0	0	1	706	28	42	43.6	0	59	51	1.31886	127	3.28422	52	0.58708	5.2	33.336	4	3	92	5.10692	107.5	74.5	0	7.77989
16989	1	35	1	0	16.0989	69	0	0	1	1455	10	22	46.8	0	12	56	1.44816	190	4.9134	65	0.73385	4.9	30.057	1	3	81	4.49631	95	60	0	7.87569
9161	1	40	0	0	16.1049	60.6	0	0	1	4436	15	16	50	0	12	43.4	1.12232	150	3.879	35	0.39515	4.7	27.871	1	3	89	4.94039	100.5	56.5	0	7.35084
19412	0	48	1	0	16.1228	63	0	0	0	669	11	10	40.3	0	9	80	2.0688	231	5.97366	18	0.20322	5.5	36.615	1	1	83	4.60733	98.5	56	0	6.61607
3674	0	47	0	0	16.1289	60	0	0	0	3206	18	19	38.5	0	16	53.9	1.39385	174	4.49964	33	0.37257	5	31.15	1	1	85	4.71835	99.5	65	0	7.24601
2311	1	40	66	0	16.1295	65.6	0	0	1	4367	14	13	44.5	0	20	74	1.91364	201	5.19786	60	0.6774	4.8	28.964	1	3	86	4.77386	97.5	62.5	0	7.85554
5571	1	50	90	0	16.1362	68.9	0	0	1	3640	12	12	49.7	0	17	59	1.52574	193	4.99098	38	0.42902	5.1	32.243	2	3	85	4.71835	102.5	64.5	0	7.38709
7741	0	20	1	0	16.1435	54	0	0	0	721	18	14	35.6	0	11	77.4	2.00156	158	4.08588	34	0.38386	4.9	30.057	1	3	85	4.71835	81.5	49	0	7.27586
19698	0	40	1	0	16.1459	58.5	0	0	0	365	15	19	37.5	1	11	87	2.24982	173	4.47378	26	0.29354	5.3	34.429	1	1	95	5.27345	106	60.5	0	7.11883
12467	0	35	54	0	16.1596	67.6	0	0	0	3222	25	23	42.2	1	19	62.7	1.62142	201	5.19786	31	0.34999	5.2	33.336	1	1	86	4.77386	81.5	52.5	0	7.19519
11340	1	37	1	0	16.1599	63	0	0	1	3619	19	21	52.3	0	15	48.9	1.26455	150	3.879	60	0.6774	4.942	30.5161	1	2	86	4.77386	83.5	51	0	7.85554
19142	0	39	1	0	16.1782	63	0	0	0	1118	15	17	40.9	0	8	66	1.70676	153	3.95658	24	0.27096	5.9	40.987	1	1	90	4.9959	106.5	62	0	6.98472
12339	0	42	0	0	16.1913	66	0	0	0	713	13	9	39	0	7	87	2.24982	209	5.40474	39	0.44031	5.3	34.429	1	1	78	4.32978	109.5	67.5	0	7.32712
19398	0	58	0	0	16.1915	62	0	0	0	377	14	19	38.9	0	16	78	2.01708	259	6.69774	30	0.3387	5.3	34.429	1	1	101	5.60651	108.5	71	0	7.32317
12224	0	35	0	0	16.1979	60	0	0	0	360	15	18	42.3	1	7	47.8	1.23611	181	4.68066	27	0.30483	5.2	33.336	1	1	84	4.66284	99.5	59.5	0	7.03351
9784	0	45	0	0	16.2102	59.6	0	0	0	4077	11	14	37.6	1	11	52	1.34472	179	4.62894	40	0.4516	5.7	38.801	1	1	92	5.10692	92	58.5	0	7.51752
7454	1	39	126	0	16.2107	65.7	0	0	1	2553	13	13	50.5	0	12	66.4	1.7171	220	5.6892	40	0.4516	5.1	32.243	2	3	97	5.38447	92.5	60.5	0	7.57044
13370	0	37	1	0	16.2127	58.5	0	0	0	524	10	13	38.6	0	12	64.6	1.67056	179	4.62894	30	0.3387	4.9	30.057	1	1	81	4.49631	94.5	59.5	0	7.1025
10036	0	47	1	0	16.2189	63	0	0	0	3466	15	17	40.9	0	7	72.2	1.86709	185	4.7841	49	0.55321	4.84	29.4012	1	1	86	4.77386	117	73	0	7.65302
18837	0	39	1	0	16.2262	68	0	0	0	1197	13	11	42.9	0	14	58	1.49988	119	3.07734	43	0.48547	5.3	34.429	1	1	87	4.82937	86.5	51.5	0	7.53396
6782	1	56	77	0	16.2273	62	0	0	1	1084	11	13	45.8	0	16	74.4	1.92398	272	7.03392	42	0.47418	5	31.15	2	1	84	4.66284	110	64	0	7.47534
10167	0	26	1	0	16.2337	57	0	0	0	357	13	16	38.6	0	8	62	1.60332	200	5.172	30	0.3387	4.9	30.057	1	2	89	4.94039	106	69.5	0	7.19669
13894	0	30	1	0	16.2394	58.5	0	0	0	2923	19	22	40.9	0	18	56.3	1.45592	146	3.77556	39	0.44031	4.5	25.685	1	1	83	4.60733	98.5	59.5	0	7.38926
19231	1	49	154	0	16.2402	65	0	0	1	1171	25	17	47.1	0	22	105	2.7153	193	4.99098	50	0.5645	5.1	32.243	3	1	99	5.49549	124	81.5	0	7.814
18636	0	45	0	0	16.2417	70	0	0	0	1066	7	10	42.1	0	17	63	1.62918	142	3.67212	51	0.57579	5.2	33.336	1	1	95	5.27345	91	57.5	0	7.79256
18705	0	49	127.4	0	16.2462	66	0	0	0	826	14	17	42.9	0	30	103	2.66358	220	5.6892	44	0.49676	5.3	34.429	2	1	99	5.49549	120.5	76	0	7.68616
13129	0	39	1	0	16.25	61	0	0	0	724	16	17	41.6	0	9	58.3	1.50764	168	4.34448	33	0.37257	5.1	32.243	1	1	86	4.77386	119.5	71.5	0	7.25771
20269	1	35	1	0	16.252	63	0	0	1	320	108	87	45	0	16	40	1.0344	132	3.41352	26	0.29354	5.2	33.336	1	2	86	4.77386	98.5	48.5	0	7.0193
10110	0	23	12.6	0	16.2685	60.5	0	0	0	1883	17	18	45.1	1	10	57.9	1.49729	160	4.1376	37	0.41773	4.7	27.871	1	3	84	4.66284	88	57	0	7.34859
2662	1	45	126	0	16.2738	65.5	0	0	1	3031	16	25	46.7	0	12	71.6	1.85158	155	4.0083	69	0.77901	5.146	32.7458	2	3	99	5.49549	113.5	70	0	8.13608
8415	0	35	21.1	0	16.2798	60	0	0	0	1830	24	31	44	0	27	73	1.88778	172	4.44792	48	0.54192	4.8	28.964	1	1	87	4.82937	97	67.5	0	7.64396
18602	0	47	88	0	16.2839	65	0	0	0	1102	29	19	42	0	35	72	1.86192	255	6.5943	69	0.77901	5.1	32.243	2	1	91	5.05141	99.5	65.5	0	8.05182
18679	0	34	4.24667	0	16.2874	60	0	0	0	1094	8	12	41.8	0	10	84	2.17224	167	4.31862	24	0.27096	5.5	36.615	1	1	92	5.10692	90.5	49.5	0	7.0067
8200	0	35	175	0	16.2891	60	0	0	0	4446	16	21	41.7	0	33	86.7	2.24206	188	4.86168	40	0.4516	4.7	27.871	3	2	82	4.55182	95.5	63	0	7.40245
16949	0	33	54.6	0	16.2909	63	0	0	0	1830	14	18	39.9	0	15	71	1.83606	216	5.58576	58	0.65482	5.4	35.522	1	1	96	5.32896	99.5	62	0	7.93164
7356	0	50	126	0	16.2926	59.2	0	0	0	4067	18	23	42.6	0	27	67.6	1.74814	167	4.31862	46	0.51934	4.6	26.778	2	1	84	4.66284	112	69.5	0	7.56631
16205	1	39	0	0	16.2931	66.5	0	0	1	1056	13	19	46.7	0	24	54	1.39644	155	4.0083	41	0.46289	4.8	28.964	1	1	88	4.88488	118.5	76.5	0	7.49776
18676	0	46	1	0	16.2941	65	0	0	0	717	8	10	44.9	0	12	74	1.91364	198	5.12028	69	0.77901	5.1	32.243	1	1	82	4.55182	92.5	56.5	0	7.94768
766	1	50	140.28	0	16.2967	73	0	0	1	4555	45	94	46.6	0	51	122.6	3.17044	284	7.34424	116	1.30964	4.9	30.057	3	3	79	4.38529	118.5	68.5	0	8.42989
6599	1	56	0	0	16.2991	67	0	0	1	1411	11	8	48.5	0	16	54.5	1.40937	191	4.93926	72	0.81288	4.9	30.057	1	3	96	5.32896	92	57	0	8.14787
18598	0	52	90	0	16.2995	66	0	0	0	357	17	17	43.2	0	29	77	1.99122	194	5.01684	78	0.88062	5.2	33.336	2	3	83	4.60733	112.5	73	0	8.0824
18138	0	22	0	0	16.2995	69	0	0	0	1134	8	11	43.2	0	12	68	1.75848	205	5.3013	74	0.83546	5.4	35.522	1	1	86	4.77386	99	69	0	8.06527
12214	0	30	1	0	16.3	53.5	0	0	0	1162	22	24	35.8	0	12	62.3	1.61108	175	4.5255	15	0.16935	4.8	28.964	1	1	90	4.9959	107	62	0	6.51471
3486	0	35	1	0	16.309	60	0	0	0	3275	31	35	40.2	0	33	71.4	1.8464	136	3.51696	25	0.28225	5.2	33.336	1	1	91	5.05141	87.5	57.5	0	7.03659
13414	0	32	1	0	16.309	65	0	0	0	728	28	22	40.2	0	13	69.6	1.79986	176	4.55136	51	0.57579	5.4	35.522	1	1	91	5.05141	104.5	67	0	7.74954
14067	0	49	0	0	16.3143	63	0	0	0	457	7	14	41.4	0	11	92.5	2.39205	283	7.31838	49	0.55321	5.6	37.708	1	1	88	4.88488	94.5	58.5	0	7.67601
15659	0	34	18	0	16.3148	63.5	0	0	0	1035	16	17	43.4	0	15	73.4	1.89812	186	4.80996	26	0.29354	4.9	30.057	1	2	81	4.49631	98	57	0	6.9594
4190	0	37	0	0	16.3175	54.6	0	0	0	1092	14	17	37.7	1	11	77.1	1.99381	193	4.99098	71	0.80159	5.1	32.243	1	1	92	5.10692	87.5	55.5	0	8.09132
18579	0	29	0	0	16.3176	55	0	0	0	1106	16	18	38.9	0	14	85	2.1981	264	6.82704	119	1.34351	5.2	33.336	1	1	91	5.05141	118.5	80.5	0	8.59684
3637	0	56	2.8	0	16.3188	59	0	0	0	2188	8	15	41.1	0	8	72.2	1.86709	229	5.92194	39	0.44031	4.9	30.057	1	1	97	5.38447	87	52.5	0	7.54513
18565	1	36	36	0	16.321	67	0	0	1	1113	16	11	45.9	0	14	101	2.61186	207	5.35302	21	0.23709	5.1	32.243	1	1	87	4.82937	104	63.5	0	6.81728
11904	1	39	168	0	16.3248	70.5	0	0	1	1833	8	21	53.6	1	21	51	1.31886	124	3.20664	61	0.68869	5.1	32.243	3	3	84	4.66284	122	84	0	7.84854
13151	0	40	60	0	16.3393	60.2	0	0	0	2927	12	18	38.7	0	22	73.6	1.9033	201	5.19786	69	0.77901	5.1	32.243	1	3	92	5.10692	105.5	61.5	0	8.06275
7632	0	31	1	0	16.3439	63.9	0	0	0	4420	11	10	45.8	0	12	61.8	1.59815	189	4.88754	33	0.37257	4.9	30.057	1	1	82	4.55182	91	57	0	7.21008
12074	0	36	36	0	16.3447	70	0	0	0	3459	11	12	43.8	0	8	40.4	1.04474	147	3.80142	68	0.76772	5.2	33.336	1	1	98	5.43998	94	62	0	8.11133
12996	0	35	1	0	16.3466	63.8	0	0	0	2423	14	22	42.9	0	10	48.6	1.2568	166	4.29276	46	0.51934	4.8	28.964	1	1	73	4.05223	90	52.5	0	7.42595
7879	0	31	0	0	16.3467	63	0	0	0	287	11	10	41.9	0	7	72.9	1.88519	157	4.06002	34	0.38386	5	31.15	1	1	93	5.16243	107	70	0	7.36581
9818	0	41	0	0	16.3484	60.2	0	0	0	4005	17	19	40.4	0	11	70.7	1.8283	197	5.09442	36	0.40644	5	31.15	1	1	84	4.66284	100	67.5	0	7.32119
10944	1	35	0	0	16.3524	61	0	0	1	3009	15	21	43.5	0	8	59.8	1.54643	182	4.70652	27	0.30483	4.534	26.0566	1	1	79	4.38529	117	69.5	0	6.97214
14493	0	45	0	0	16.356	61	0	0	0	1823	10	13	39.6	0	14	71.8	1.85675	182	4.70652	23	0.25967	5.4	35.522	1	1	84	4.66284	92.5	56.5	0	6.87316
19245	0	25	1	0	16.3569	63	0	0	0	1085	6	11	41.3	0	11	92	2.37912	210	5.4306	36	0.40644	5.2	33.336	1	1	88	4.88488	99	54	0	7.36771
8611	0	40	0	0	16.368	57	0	0	0	4402	14	18	44.4	0	9	76.1	1.96795	161	4.16346	39	0.44031	5.1	32.243	1	1	78	4.32978	89.5	56.5	0	7.32712
14514	0	64	0	0	16.3725	61	0	0	0	2812	23	35	40.1	0	33	54.5	1.40937	249	6.43914	91	1.02739	6.1	43.173	1	1	102	5.66202	121	72.5	0	8.44269
13700	0	49	1	0	16.3729	62	0	0	0	693	15	18	44.9	0	15	54.9	1.41971	178	4.60308	41	0.46289	5.5	36.615	1	1	92	5.10692	91	59.5	0	7.54221
20817	0	45	0	0	16.3759	60	0	0	0	381	8	12	41.4	0	12	66	1.70676	167	4.31862	33	0.37257	4.9	30.057	1	1	74	4.10774	113.5	71	0	7.10743
13306	0	40	1	0	16.3814	65	0	0	0	720	9	12	46.4	0	10	65.8	1.70159	194	5.01684	33	0.37257	5.5	36.615	1	1	86	4.77386	103.5	71.5	0	7.25771
7777	0	28	1	0	16.3824	57.5	0	0	0	1051	11	21	37.8	0	6	67.6	1.74814	171	4.42206	64	0.72256	4.4	24.592	1	2	71	3.94121	96.5	63	0	7.72842
4016	0	37	1	0	16.3826	58	0	0	0	4013	10	12	38	0	12	48.9	1.26455	125	3.2325	32	0.36128	5.4	35.522	1	1	79	4.38529	95	59	0	7.14204
8816	1	32	0	0	16.3853	63	0	0	1	1799	9	10	48.7	0	10	37.5	0.96975	133	3.43938	94	1.06126	4.9	30.057	1	3	90	4.9959	112	67	0	8.34996
20018	0	30	0	0	16.3864	62	0	0	0	679	10	9	45.1	0	19	99	2.56014	194	5.01684	34	0.38386	5.1	32.243	1	1	94	5.21794	107.5	68	0	7.37651
11626	0	38	22	0	16.3876	55.3	0	0	0	287	14	20	40.6	0	12	65.9	1.70417	170	4.3962	26	0.29354	5.452	36.0904	1	1	81	4.49631	124	70.5	0	6.9594
16726	0	39	1	0	16.3879	70	0	0	0	1078	11	9	44.4	0	11	85	2.1981	200	5.172	41	0.46289	5.4	35.522	1	1	85	4.71835	102	58.5	0	7.46308
16804	0	42	1	0	16.396	66	0	0	0	1832	19	26	42.5	0	20	58	1.49988	151	3.90486	37	0.41773	4.9	30.057	1	1	98	5.43998	104	66	0	7.50274
15720	0	31	1	0	16.3976	59.5	0	0	0	2373	20	19	43.3	0	23	75	1.9395	164	4.24104	26	0.29354	5.4	35.522	1	1	93	5.16243	88.5	47	0	7.09755
173	0	35	1	0	16.4002	60	0	0	0	743	11	15	42.3	0	14	69.6	1.79986	218	5.63748	25	0.28225	5.4	35.522	1	1	86	4.77386	102	63.5	0	6.98008
13751	0	41	0	0	16.402	66	0	0	0	2912	8	13	43.9	0	13	69.5	1.79727	186	4.80996	48	0.54192	4.8	28.964	1	1	80	4.4408	92	58	0	7.56008
7198	0	38	1	0	16.4035	60.5	0	0	0	3653	14	16	38.6	0	10	92	2.37912	200	5.172	30	0.3387	5.044	31.6309	1	1	89	4.94039	93	58.5	0	7.19669
17201	0	36	11	0	16.4119	61	0	0	0	1825	15	23	41.7	0	15	84	2.17224	198	5.12028	43	0.48547	4.9	30.057	1	1	98	5.43998	108.5	76.5	0	7.65302
10070	0	46	122.5	0	16.4164	64.5	0	0	0	4094	27	34	42.5	0	18	92.6	2.39464	216	5.58576	36	0.40644	5.2	33.336	2	1	89	4.94039	119	73.5	0	7.37901
5385	0	48	0	0	16.4249	59.2	0	0	0	3989	11	11	38.6	0	12	59.8	1.54643	185	4.7841	39	0.44031	5.1	32.243	1	1	84	4.66284	91.5	59.5	0	7.40123
11565	0	49	1	0	16.4254	63.5	0	0	0	3637	7	18	37.7	1	8	51.4	1.3292	202	5.22372	37	0.41773	4.942	30.5161	1	1	86	4.77386	84	50	0	7.37212
11734	0	35	1	0	16.4256	59	0	0	0	331	18	25	38.3	0	21	65.3	1.68866	207	5.35302	28	0.31612	5.2	33.336	1	1	90	4.9959	96	64.5	0	7.13887
6	1	36	8.4	0	16.4294	62.5	0	0	1	722	8	14	50.2	0	9	58.9	1.52315	163	4.21518	35	0.39515	5	31.15	1	3	98	5.43998	92	56	0	7.44717
6149	0	58	0	0	16.4444	55.8	0	0	0	1094	17	21	37	0	23	54.2	1.40161	187	4.83582	66	0.74514	5.4	35.522	1	1	91	5.05141	95.5	63	0	8.00737
5555	0	53	0	0	16.4451	58.5	0	0	0	4372	18	17	38.9	1	12	63.1	1.63177	173	4.47378	50	0.5645	4.4	24.592	1	1	89	4.94039	114	68	0	7.70751
10164	0	22	5.6	0	16.4456	63	0	0	0	350	19	18	43	0	10	28.8	0.744768	108	2.79288	37	0.41773	5.2	33.336	1	1	85	4.71835	88	55.5	0	7.36042
3851	1	47	90	0	16.4487	66.3	0	0	1	4307	17	25	49.8	0	18	59.6	1.54126	223	5.76678	90	1.0161	5.1	32.243	2	2	101	5.60651	98.5	60.5	0	8.42178
10361	0	30	0	0	16.4509	65.6	0	0	0	2485	17	16	46.1	0	7	58.7	1.51798	157	4.06002	46	0.51934	4.432	24.9418	1	2	89	4.94039	106	68.5	0	7.62413
10166	0	23	0	0	16.4516	58.5	0	0	0	2940	14	28	40.5	0	18	44.9	1.16111	150	3.879	72	0.81288	5.4	35.522	1	1	84	4.66284	97	63.5	0	8.01434
19152	0	44	0	0	16.4523	67.5	0	0	0	1049	12	12	45.5	0	23	87	2.24982	190	4.9134	39	0.44031	5.3	34.429	1	1	87	4.82937	113.5	64.5	0	7.43632
10921	0	35	1	0	16.4532	60	0	0	0	2916	8	10	41.7	1	10	43.4	1.12232	148	3.82728	58	0.65482	4.84	29.4012	1	1	86	4.77386	89	56.5	0	7.82164
19177	0	46	84	0	16.4557	59	0	0	0	593	11	11	43.4	0	10	80	2.0688	209	5.40474	41	0.46289	5.3	34.429	2	1	92	5.10692	114	73.5	0	7.54221
6831	0	56	0	0	16.4572	66	0	0	0	412	18	24	42.5	1	17	47.8	1.23611	186	4.80996	61	0.68869	4.9	30.057	1	1	85	4.71835	92.5	59	0	7.86038
10877	0	35	1	0	16.4638	67.2	0	0	0	3648	14	22	42.2	0	12	59.7	1.54384	177	4.57722	43	0.48547	4.636	27.1715	1	2	86	4.77386	94	59.5	0	7.5224
122	1	55	84	0	16.4661	69	0	0	1	4272	15	13	48.6	0	29	52.3	1.35248	192	4.96512	58	0.65482	4.6	26.778	2	3	85	4.71835	107	63	0	7.80995
4805	0	38	1	0	16.4689	59.5	0	0	0	4348	10	11	37.7	0	7	66	1.70676	157	4.06002	24	0.27096	5	31.15	1	1	81	4.49631	103	65	0	6.87936
20927	0	35	0	0	16.4731	73	0	0	0	377	14	10	42.7	0	13	61	1.57746	131	3.38766	35	0.39515	5.7	38.801	1	1	92	5.10692	118.5	65.5	0	7.38399
5191	0	41	126	0	16.4777	58.7	0	0	0	4373	20	21	42.5	0	72	75.5	1.95243	196	5.06856	47	0.53063	4.5	25.685	2	1	86	4.77386	100.5	65.5	0	7.61135
10796	0	36	0	0	16.4794	62	0	0	0	3275	14	19	46.9	0	6	53.2	1.37575	141	3.64626	36	0.40644	5.452	36.0904	1	1	85	4.71835	93.5	64.5	0	7.33302
16879	0	40	36	0	16.4799	65	0	0	0	1830	14	21	39.9	0	11	60	1.5516	200	5.172	32	0.36128	5.2	33.336	1	3	83	4.60733	100	55.5	0	7.19143
20702	0	41	84	0	16.4814	68	0	0	0	401	5	11	45.8	0	12	62	1.60332	169	4.37034	55	0.62095	5.5	36.615	2	1	91	5.05141	100	55	0	7.82505
9629	0	34	1	0	16.4873	66.7	0	0	0	1120	10	14	46.7	0	12	55.6	1.43782	160	4.1376	61	0.68869	5.1	32.243	1	1	90	4.9959	107	68	0	7.91754
11075	1	26	1	0	16.489	63.5	0	0	1	1484	17	17	51.6	0	17	41.1	1.06285	154	3.98244	52	0.58708	5.044	31.6309	1	3	90	4.9959	102	62.5	0	7.75791
15233	0	32	0	0	16.492	65	0	0	0	711	15	17	45.5	0	11	49.1	1.26973	166	4.29276	43	0.48547	4.8	28.964	1	1	86	4.77386	103	67	0	7.5224
7242	0	38	12	0	16.494	60.3	0	0	0	3645	20	22	46	0	21	65.2	1.68607	189	4.88754	32	0.36128	4.9	30.057	1	3	88	4.88488	87	56	0	7.24993
8284	0	33	0	0	16.495	57.2	0	0	0	2904	11	8	40.4	0	6	70.4	1.82054	150	3.879	39	0.44031	5.1	32.243	1	1	98	5.43998	115	75.5	0	7.55538
9632	0	33	0	0	16.4983	55	0	0	0	2828	11	11	42.5	0	9	43	1.11198	163	4.21518	64	0.72256	5.4	35.522	1	1	88	4.88488	102.5	61	0	7.94307
11217	0	53	2.8	0	16.5041	63	0	0	0	367	17	21	39.6	0	15	74	1.91364	224	5.79264	34	0.38386	5.3	34.429	1	1	102	5.66202	93	54	0	7.45819
2192	1	62	245	0	16.5047	66.7	0	0	1	4421	10	21	56	0	19	89.7	2.31964	211	5.45646	56	0.63224	4.7	27.871	3	3	88	4.88488	105	68.5	0	7.80954
17744	0	39	1	0	16.508	61	0	0	0	1426	6	10	44.4	0	12	64	1.65504	199	5.14614	39	0.44031	5.6	37.708	1	1	97	5.38447	123.5	75.5	0	7.54513
10206	0	43	0	0	16.5082	59	0	0	0	4008	10	14	39.1	0	12	49.1	1.26973	178	4.60308	47	0.53063	5	31.15	1	1	87	4.82937	99.5	63	0	7.62291
19931	0	37	1	0	16.5111	65	0	0	0	671	11	12	44.3	0	14	75	1.9395	161	4.16346	31	0.34999	5.4	35.522	1	1	94	5.21794	96.5	62.5	0	7.28413
5672	1	53	1	0	16.5113	60.7	0	0	1	356	9	14	41.9	0	12	46.3	1.19732	298	7.70628	128	1.44512	5.7	38.801	1	3	104	5.77304	91.5	63	0	8.80327
11321	0	24	1	0	16.5117	58.8	0	0	0	2170	15	19	38.4	0	8	79.6	2.05846	155	4.0083	39	0.44031	4.942	30.5161	1	2	77	4.27427	93.5	60	0	7.31422
17605	0	45	0	0	16.514	64	0	0	0	377	6	21	43.5	0	17	51	1.31886	161	4.16346	114	1.28706	6	42.08	1	2	102	5.66202	125.5	80	0	8.66802
6273	0	37	12	0	16.5165	66	0	0	0	1158	11	10	42.6	0	10	102	2.63772	212	5.48232	40	0.4516	5.4	35.522	1	1	89	4.94039	110	50.5	0	7.48437
16835	0	36	1	0	16.5173	62	0	0	0	385	14	23	41.6	0	12	94	2.43084	189	4.88754	38	0.42902	5	31.15	1	1	89	4.94039	99.5	66.5	0	7.43308
18310	0	52	36	0	16.5251	64	0	0	0	312	16	18	44.5	0	30	89	2.30154	213	5.50818	48	0.54192	5.6	37.708	1	1	100	5.551	112	72.5	0	7.78322
18849	0	40	22	0	16.5281	63	0	0	0	399	23	17	39.3	0	16	96	2.48256	164	4.24104	28	0.31612	5.2	33.336	1	1	86	4.77386	85.5	56.5	0	7.0934
17214	0	39	0	0	16.5297	62	0	0	0	1805	17	22	40.9	0	12	76	1.96536	176	4.55136	32	0.36128	5.5	36.615	1	1	91	5.05141	115	65	0	7.28345
2004	1	53	0	0	16.5301	60	0	0	1	4381	12	11	47.1	0	6	55.6	1.43782	219	5.66334	97	1.09513	5.5	36.615	1	3	101	5.60651	95	64.5	0	8.49668
2722	0	29	1	0	16.5343	55.5	0	0	0	4074	11	16	37.6	1	8	64.4	1.66538	184	4.75824	57	0.64353	5	31.15	1	1	94	5.21794	99	60	0	7.8932
17822	0	51	1	0	16.5412	62	0	0	0	363	10	14	40.1	0	10	102	2.63772	201	5.19786	27	0.30483	5.6	37.708	1	1	95	5.27345	110.5	57.5	0	7.15657
11404	1	60	1	0	16.5441	65.5	0	0	1	3594	11	17	47.7	0	11	67.2	1.73779	163	4.21518	57	0.64353	5.044	31.6309	1	1	91	5.05141	120	77.5	0	7.86076
9705	0	31	1	0	16.5529	63.3	0	0	0	1263	11	15	41.9	0	7	69.9	1.80761	176	4.55136	58	0.65482	4.7	27.871	1	3	94	5.21794	107.5	66	0	7.91059
9695	0	32	0	0	16.5625	58	0	0	0	378	10	16	40.1	0	11	54.2	1.40161	143	3.69798	31	0.34999	4.7	27.871	1	1	92	5.10692	105	66	0	7.26263
13236	0	40	1	0	16.5648	62	0	0	0	3087	5	16	42.3	0	11	73.6	1.9033	163	4.21518	23	0.25967	4.9	30.057	1	1	92	5.10692	117	72	0	6.96414
14275	0	30	0	0	16.5649	60	0	0	0	2456	12	16	39.9	0	12	98.3	2.54204	213	5.50818	32	0.36128	5.1	32.243	1	2	76	4.21876	103.5	69.5	0	7.10332
18173	0	23	12	0	16.5666	59	0	0	0	1498	6	12	43.8	1	14	73	1.88778	135	3.4911	53	0.59837	4.9	30.057	1	3	88	4.88488	105.5	60	0	7.75448
12641	0	32	0	0	16.5691	63.9	0	0	0	3094	13	18	45	0	13	37.8	0.977508	147	3.80142	33	0.37257	5.2	33.336	1	1	91	5.05141	111	72.5	0	7.31422
14489	0	42	126	0	16.5693	62	0	0	0	2558	14	19	42.1	1	16	75.8	1.96019	154	3.98244	28	0.31612	5.1	32.243	2	1	80	4.4408	111.5	76	0	7.02108
14174	0	25	0	0	16.5782	59.5	0	0	0	1701	13	12	40.5	0	13	57.6	1.48954	154	3.98244	31	0.34999	5.1	32.243	1	1	87	4.82937	92.5	61.5	0	7.20675
16099	0	40	0	0	16.5782	60.5	0	0	0	2157	19	21	40.5	0	16	61	1.57746	174	4.49964	54	0.60966	5.1	32.243	1	1	92	5.10692	116.5	58	0	7.81763
18760	0	38	18	0	16.5784	65	0	0	0	1156	14	16	42.6	0	10	81	2.09466	155	4.0083	51	0.57579	5.1	32.243	1	1	93	5.16243	116	75	0	7.77128
2415	1	58	126	0	16.5791	60.1	0	0	1	386	17	20	44.7	0	9	58.6	1.5154	173	4.47378	32	0.36128	5	31.15	2	1	93	5.16243	135	81.5	0	7.30519
3396	0	40	12	0	16.5816	59.5	0	0	0	4394	11	13	46.8	1	8	60.5	1.56453	177	4.57722	52	0.58708	5.2	33.336	1	1	96	5.32896	97.5	61	0	7.82244
2564	0	57	1	0	16.5856	64	0	0	0	365	12	14	42.3	0	11	41.1	1.06285	132	3.41352	92	1.03868	4.8	28.964	1	1	85	4.71835	117	73	0	8.27129
17258	0	41	1	0	16.5953	68	0	0	0	364	24	26	45.4	0	15	80	2.0688	181	4.68066	20	0.2258	4.9	30.057	1	1	74	4.10774	106.5	65	0	6.60665
4223	0	31	1	0	16.5982	57.5	0	0	0	2932	18	18	38.5	1	10	59.2	1.53091	169	4.37034	51	0.57579	4.9	30.057	1	3	86	4.77386	97	61	0	7.69303
9321	0	33	0	0	16.5991	61	0	0	0	4331	17	11	42.6	0	10	63.8	1.64987	173	4.47378	27	0.30483	4.6	26.778	1	1	86	4.77386	90.5	54	0	7.05704
9109	0	23	1	0	16.5997	56.6	0	0	0	1456	10	13	37.2	0	5	49.5	1.28007	251	6.49086	43	0.48547	4.9	30.057	1	1	82	4.55182	98.5	61	0	7.47477
644	1	35	0	0	16.6016	63.5	0	0	1	4337	11	12	49.4	0	12	48.7	1.25938	186	4.80996	58	0.65482	4.9	30.057	1	3	95	5.27345	102.5	64	0	7.92117
11465	0	41	177.5	0	16.6024	58.8	0	0	0	3661	12	21	40.3	0	10	65.7	1.699	174	4.49964	52	0.58708	4.738	28.2863	3	1	84	4.66284	95	58.5	0	7.68891
18606	0	35	0	0	16.6074	63.5	0	0	0	1113	22	17	43.8	0	17	84	2.17224	201	5.19786	25	0.28225	5.3	34.429	1	3	97	5.38447	102	57	0	7.10044
9931	0	38	0	0	16.6092	59.5	0	0	0	2490	19	19	44.4	0	16	54.1	1.39903	142	3.67212	20	0.2258	4.8	28.964	1	1	88	4.88488	109	65	0	6.77992
12477	1	33	1	0	16.611	67	0	0	1	3277	19	25	54.6	0	16	58.1	1.50247	158	4.08588	19	0.21451	5.2	33.336	1	1	83	4.60733	99	65.5	0	6.67013
14162	0	44	1	0	16.6158	61.5	0	0	0	678	14	15	40.8	0	15	64.8	1.67573	217	5.61162	91	1.02739	5.2	33.336	1	1	92	5.10692	87.5	55	0	8.3395
2773	0	44	0	0	16.6173	63.8	0	0	0	373	13	20	42.7	1	8	65.9	1.70417	197	5.09442	32	0.36128	5.4	35.522	1	1	81	4.49631	105	63	0	7.16704
12635	0	33	0	0	16.6182	60.5	0	0	0	1092	13	17	38.8	0	8	65.9	1.70417	148	3.82728	39	0.44031	4.9	30.057	1	3	94	5.21794	89	58	0	7.51371
8106	0	45	12	0	16.6191	58	0	0	0	820	14	15	43.4	0	7	51.6	1.33438	162	4.18932	90	1.0161	4.4	24.592	1	1	89	4.94039	88	57.5	0	8.2953
7947	0	41	1	0	16.6191	68.5	0	0	0	3987	14	19	43.4	0	8	59.4	1.53608	156	4.03416	25	0.28225	5	31.15	1	1	83	4.60733	108.5	68	0	6.94457
16900	0	33	0	0	16.6195	63	0	0	0	1876	9	18	48.2	0	10	54	1.39644	182	4.70652	38	0.42902	5.2	33.336	1	1	88	4.88488	107.5	68.5	0	7.42178
3775	1	55	0	0	16.624	60.5	0	0	1	4386	12	16	48.1	0	10	57.1	1.47661	135	3.4911	28	0.31612	5	31.15	1	1	91	5.05141	109	78	0	7.14992
16904	0	34	1	0	16.6262	64.5	0	0	0	1688	12	16	44.5	0	14	50	1.293	156	4.03416	33	0.37257	5.7	38.801	1	1	92	5.10692	79	53	0	7.32515
14236	0	47	1	0	16.631	67.5	0	0	0	816	18	15	50.7	0	21	76	1.96536	188	4.86168	53	0.59837	5.2	33.336	1	1	93	5.16243	94.5	52	0	7.80974
20255	0	61	0	0	16.6327	55	0	0	0	733	20	23	39.6	0	18	98	2.53428	230	5.9478	56	0.63224	5.5	36.615	1	1	100	5.551	111.5	72.5	0	7.93737
6381	0	39	1	0	16.6381	67	0	0	0	1804	10	16	42.7	0	13	56.2	1.45333	164	4.24104	75	0.84675	4.9	30.057	1	1	83	4.60733	101	64	0	8.04318
17793	0	58	0	0	16.6388	63	0	0	0	383	55	51	40.7	0	17	45	1.1637	172	4.44792	118	1.33222	5.4	35.522	1	1	103	5.71753	114	64	0	8.71227
13865	0	35	0	0	16.64	62.5	0	0	0	2967	14	20	38.8	0	19	62.3	1.61108	140	3.6204	20	0.2258	5.4	35.522	1	1	88	4.88488	92	50	0	6.77992
7634	0	33	0	0	16.6425	64.5	0	0	0	2863	10	18	43.3	0	12	70	1.8102	205	5.3013	73	0.82417	5.5	36.615	1	1	83	4.60733	97.5	60	0	8.01615
2031	1	45	0	0	16.6431	68.2	0	0	1	2923	10	22	52.2	0	14	45.3	1.17146	235	6.0771	101	1.14029	5.4	35.522	1	3	85	4.71835	107.5	73	0	8.36462
20910	0	39	0	0	16.6453	65	0	0	0	259	74	42	43.2	0	21	80	2.0688	205	5.3013	34	0.38386	5.6	37.708	1	1	80	4.4408	99.5	58	0	7.21524
13089	0	40	0	0	16.6519	61.8	0	0	0	2961	10	13	39.8	0	13	56.5	1.46109	158	4.08588	40	0.4516	5.5	36.615	1	1	86	4.77386	101.5	56	0	7.45008
2110	0	34	0	0	16.6611	54	0	0	0	1840	18	22	38.9	1	12	52.7	1.36282	189	4.88754	48	0.54192	5	31.15	1	1	85	4.71835	83	53.5	0	7.62071
14570	0	29	0	0	16.666	62	0	0	0	2555	16	20	43.2	0	13	43.4	1.12232	145	3.7497	24	0.27096	5	31.15	1	1	88	4.88488	96.5	63	0	6.96224
15059	0	45	0	0	16.6688	62.5	0	0	0	1673	14	20	43.1	0	12	66.9	1.73003	169	4.37034	29	0.32741	5	31.15	1	1	83	4.60733	102.5	63	0	7.09299
12220	0	44	1	0	16.6689	64	0	0	0	3501	8	16	43.8	0	12	67.7	1.75072	214	5.53404	42	0.47418	5.4	35.522	1	1	86	4.77386	98.5	67.5	0	7.49887
5451	0	63	60	0	16.6702	61.5	0	0	0	3261	19	26	41.3	0	18	91.8	2.37395	256	6.62016	93	1.04997	5.7	38.801	1	1	91	5.05141	130.5	81	0	8.35031
19795	0	60	0	0	16.6708	61	0	0	0	404	10	16	40	1	13	72	1.86192	209	5.40474	31	0.34999	5.5	36.615	1	1	79	4.38529	112.5	64.5	0	7.11029
8237	0	31	1	0	16.6743	60.3	0	0	0	4343	14	13	42.9	0	10	84.1	2.17483	179	4.62894	39	0.44031	5	31.15	1	1	81	4.49631	92.5	59	0	7.36486
20626	0	50	0	0	16.6765	60	0	0	0	397	14	16	50.2	0	15	99	2.56014	231	5.97366	39	0.44031	5.5	36.615	1	1	87	4.82937	101.5	59.5	0	7.43632
12759	0	32	126	0	16.6807	68.4	0	0	0	981	10	12	41.8	0	15	55.8	1.44299	157	4.06002	55	0.62095	4.7	27.871	2	2	80	4.4408	108	64	0	7.69621
13648	1	35	1	0	16.6868	61.5	0	0	1	385	12	17	45.1	0	20	47	1.21542	156	4.03416	69	0.77901	5.4	35.522	1	1	101	5.60651	111	71	0	8.15608
12207	0	30	1	0	16.6921	66.5	0	0	0	3245	9	17	49.9	0	11	90.9	2.35067	171	4.42206	34	0.38386	5.1	32.243	1	1	94	5.21794	103.5	63.5	0	7.37651
8423	0	54	76.95	0	16.6924	60	0	0	0	4404	19	17	42.2	0	20	67.7	1.75072	162	4.18932	69	0.77901	5.1	32.243	2	1	109	6.05059	127.5	77	0	8.23231
7180	0	53	0	0	16.6973	55.8	0	0	0	4185	13	16	41	0	10	82.3	2.12828	197	5.09442	47	0.53063	5.4	35.522	1	1	73	4.05223	99.5	65	0	7.44746
12036	0	35	1	0	16.7006	67	0	0	0	3364	7	11	44.1	0	9	68.9	1.78175	214	5.53404	39	0.44031	4.7	27.871	1	1	77	4.27427	107.5	71	0	7.31422
1583	0	37	0	0	16.7089	57	0	0	0	1189	11	16	38.3	0	9	68	1.75848	234	6.05124	65	0.73385	5.2	33.336	1	1	86	4.77386	118.5	73.5	0	7.93559
17157	0	55	0	0	16.7166	71	0	0	0	1832	19	23	49.8	1	32	67	1.73262	220	5.6892	54	0.60966	5.7	38.801	1	2	92	5.10692	90.5	51.5	0	7.81763
20247	0	35	0	0	16.7174	61	0	0	0	317	7	14	46.4	0	13	85	2.1981	191	4.93926	33	0.37257	5.3	34.429	1	1	89	4.94039	94.5	58	0	7.292
14352	1	35	1	0	16.7213	63.5	0	0	1	2527	14	25	50.8	0	15	49.3	1.2749	145	3.7497	26	0.29354	5.2	33.336	1	1	87	4.82937	106	65	0	7.03086
10545	1	33	0	0	16.7237	64	0	0	1	1814	19	13	50.4	0	14	50.9	1.31627	163	4.21518	51	0.57579	4.9	30.057	1	3	87	4.82937	93	59	0	7.70459
18400	0	35	1	0	16.7283	59	0	0	0	1454	15	22	43.2	0	13	116	2.99976	239	6.18054	66	0.74514	5.1	32.243	1	1	76	4.21876	126	74	0	7.82724
17762	1	38	0	0	16.7361	61.5	0	0	1	1358	9	8	47.8	0	25	83	2.14638	215	5.5599	62	0.69998	5.4	35.522	1	1	93	5.16243	100	57.5	0	7.96659
14205	0	36	1	0	16.7367	65	0	0	0	658	10	16	45.4	0	11	57.8	1.49471	141	3.64626	26	0.29354	4.9	30.057	1	1	74	4.10774	94	50	0	6.86901
9696	0	37	0	0	16.7401	59	0	0	0	1098	11	12	43.5	0	12	49.4	1.27748	122	3.15492	15	0.16935	4.6	26.778	1	1	83	4.60733	113.5	68	0	6.43374
2355	0	41	0	0	16.7467	56	0	0	0	4378	22	18	39.1	1	9	76.4	1.9757	210	5.4306	65	0.73385	5.7	38.801	1	1	86	4.77386	116	73	0	7.93559
20100	0	43	1	0	16.755	62	0	0	0	639	9	10	43	0	16	110	2.8446	200	5.172	27	0.30483	5.2	33.336	1	1	86	4.77386	105.5	66.5	0	7.05704
17997	1	50	245	0	16.7554	70	0	0	1	1093	20	25	49.8	0	39	69	1.78434	155	4.0083	32	0.36128	5.2	33.336	3	3	85	4.71835	109.5	57	0	7.21524
15022	0	35	1	0	16.7564	67	0	0	0	2550	17	18	46.9	0	14	60	1.5516	158	4.08588	22	0.24838	5.1	32.243	1	1	79	4.38529	97	63	0	6.76734
18682	0	34	12.6	0	16.7594	66	0	0	0	665	9	10	41.1	0	8	84	2.17224	208	5.37888	33	0.37257	5.3	34.429	1	1	85	4.71835	103	64	0	7.24601
11407	0	46	0	0	16.7609	57.5	0	0	0	2273	15	19	43.5	0	12	54	1.39644	184	4.75824	57	0.64353	5.35	34.9755	1	1	77	4.27427	90	53	0	7.69371
15989	0	47	0	0	16.764	66	0	0	0	727	10	22	43.4	1	12	75	1.9395	225	5.8185	112	1.26448	5.8	39.894	1	1	100	5.551	129.5	79	0	8.63052
20063	1	30	54	0	16.7646	67	0	0	1	320	28	19	52.7	1	18	70	1.8102	192	4.96512	51	0.57579	5.4	35.522	1	1	89	4.94039	116	69	0	7.72731
12049	0	37	0	0	16.7657	58.9	0	0	0	3262	32	25	44	0	13	67.6	1.74814	158	4.08588	20	0.2258	5.2	33.336	1	1	88	4.88488	123	76.5	0	6.77992
19533	1	35	84	0	16.766	67.5	0	0	1	708	10	10	53.9	1	12	67	1.73262	187	4.83582	33	0.37257	5.1	32.243	2	2	89	4.94039	109.5	65.5	0	7.292
19703	0	48	1	0	16.7723	62	0	0	0	729	18	14	43.8	0	12	119	3.07734	245	6.3357	57	0.64353	5.6	37.708	1	1	84	4.66284	108	60.5	0	7.78072
10694	0	48	0	0	16.7758	58.8	0	0	0	2474	21	21	40.2	0	8	86.2	2.22913	206	5.32716	46	0.51934	5.044	31.6309	1	1	88	4.88488	104.5	55	0	7.61283
16359	0	35	36	0	16.7766	62.5	0	0	0	1039	11	19	41.3	0	11	57	1.47402	168	4.34448	42	0.47418	5	31.15	1	2	93	5.16243	101	64.5	0	7.57712
10952	0	48	0	0	16.7887	58.3	0	0	0	2650	18	23	40.7	0	26	51.8	1.33955	165	4.2669	39	0.44031	5.35	34.9755	1	1	80	4.4408	101	67	0	7.35244
17900	1	40	1	0	16.7914	68	0	0	1	626	10	12	51.6	0	16	57	1.47402	286	7.39596	120	1.3548	5.2	33.336	1	3	94	5.21794	96.5	56	0	8.63764
10743	0	35	1	0	16.7936	62.5	0	0	0	3630	10	13	41.5	0	11	67.2	1.73779	171	4.42206	32	0.36128	4.432	24.9418	1	1	90	4.9959	109	74.5	0	7.2724
19551	1	35	1	0	16.7957	64	0	0	1	749	10	11	47.8	0	11	54	1.39644	141	3.64626	31	0.34999	5.1	32.243	1	3	81	4.49631	107	60.5	0	7.13529
9103	0	23	1	0	16.7968	56.8	0	0	0	385	14	16	38.4	0	10	63.8	1.64987	172	4.44792	31	0.34999	4.8	28.964	1	2	82	4.55182	114	68.5	0	7.14756
15649	0	51	0	0	16.8004	61	0	0	0	770	18	27	42.1	0	13	74.9	1.93691	233	6.02538	64	0.72256	5.7	38.801	1	3	89	4.94039	106	65.5	0	7.95437
7806	1	63	1	0	16.8009	70	0	0	1	1180	14	19	46.8	0	16	48	1.24128	244	6.30984	133	1.50157	5.2	33.336	1	2	107	5.93957	119.5	73	0	8.87003
17091	0	40	1	0	16.8023	66.5	0	0	0	1763	14	18	41.1	0	12	59	1.52574	162	4.18932	36	0.40644	5.1	32.243	1	1	86	4.77386	90	56.5	0	7.34472
15683	0	38	0	0	16.8083	62	0	0	0	868	16	13	42.6	0	13	66	1.70676	183	4.73238	37	0.41773	5.1	32.243	1	1	88	4.88488	120.5	71.5	0	7.39511
12696	0	33	0	0	16.8103	62	0	0	0	3274	10	14	40.7	0	10	50.1	1.29559	133	3.43938	15	0.16935	4.8	28.964	1	1	82	4.55182	91	54	0	6.42162
6063	0	48	0	0	16.8104	65.5	0	0	0	1946	21	20	45.6	0	14	80.7	2.0869	206	5.32716	51	0.57579	5.9	40.987	1	1	89	4.94039	119.5	74	0	7.72731
11107	0	41	0	0	16.8107	66	0	0	0	3738	10	11	44.5	0	10	75.1	1.94209	176	4.55136	31	0.34999	5.146	32.7458	1	3	100	5.551	111	74	0	7.34601
9260	1	47	1	0	16.8116	70.2	0	0	1	4340	24	16	48.7	1	14	52.8	1.36541	164	4.24104	86	0.97094	4.9	30.057	1	2	89	4.94039	110	76.5	0	8.24984
16478	0	25	0	0	16.8143	64.5	0	0	0	1757	9	20	45.5	0	28	62	1.60332	180	4.6548	48	0.54192	5.2	33.336	1	3	85	4.71835	97	64.5	0	7.62071
20545	0	45	0	0	16.8188	71	0	0	0	365	15	18	47.3	0	17	103	2.66358	229	5.92194	33	0.37257	5.4	35.522	1	1	95	5.27345	109	64	0	7.35724
9107	0	27	0	0	16.8203	62.4	0	0	0	1127	7	12	43.6	0	8	59.2	1.53091	167	4.31862	40	0.4516	4.6	26.778	1	2	83	4.60733	96.5	59	0	7.41457
14297	0	35	0	0	16.8208	64	0	0	0	2898	16	22	42.9	0	12	86.3	2.23172	204	5.27544	26	0.29354	5.8	39.894	1	2	94	5.21794	115.5	70.5	0	7.10824
20584	0	35	12	0	16.8241	65	0	0	0	379	11	16	44.7	0	18	63	1.62918	150	3.879	26	0.29354	5	31.15	1	1	80	4.4408	86	49.5	0	6.94698
5214	1	34	126	0	16.8287	66.3	0	0	1	4421	35	26	53.5	0	33	48.5	1.25421	134	3.46524	52	0.58708	4.7	27.871	2	3	81	4.49631	130	75	0	7.65255
18435	0	39	0	0	16.8296	66	0	0	0	1098	16	11	47.5	0	8	45	1.1637	129	3.33594	82	0.92578	5.1	32.243	1	1	91	5.05141	107	62	0	8.22443
5882	0	38	0	0	16.83	58	0	0	0	3605	13	10	40.8	0	9	46	1.18956	161	4.16346	64	0.72256	4.8	28.964	1	1	92	5.10692	113	70	0	7.98752
18649	0	33	1	0	16.8336	66	0	0	0	1234	14	15	39.2	0	11	89	2.30154	196	5.06856	59	0.66611	5.1	32.243	1	1	83	4.60733	115	78.5	0	7.80323
17490	0	35	0	0	16.8368	62.5	0	0	0	1792	12	19	46.9	0	8	83	2.14638	228	5.89608	76	0.85804	5.2	33.336	1	1	83	4.60733	106.5	62.5	0	8.05643
8073	1	51	220	0	16.8411	69.5	0	0	1	4339	18	20	48.9	0	47	61.9	1.60073	169	4.37034	46	0.51934	5.1	32.243	3	3	82	4.55182	98	61	0	7.54221
10870	0	37	0	0	16.8432	57.5	0	0	0	3696	15	15	41.2	0	17	61.9	1.60073	191	4.93926	49	0.55321	5.044	31.6309	1	1	81	4.49631	120	67.5	0	7.59312
5433	0	39	0	0	16.8455	65	0	0	0	3617	20	20	42	0	7	42.6	1.10164	268	6.93048	36	0.40644	5.656	38.3201	1	1	83	4.60733	113	64	0	7.30921
20710	0	35	0	0	16.8475	65	0	0	0	449	8	9	41	0	19	77	1.99122	212	5.48232	82	0.92578	5.3	34.429	1	1	95	5.27345	92.5	52.5	0	8.26745
1639	1	46	60	0	16.8476	63	0	0	1	3648	21	19	49.9	0	12	72.6	1.87744	184	4.75824	55	0.62095	4.8	28.964	1	3	92	5.10692	86	57.5	0	7.83597
17645	0	29	35	0	16.8496	62	0	0	0	790	10	14	40.9	0	28	71	1.83606	160	4.1376	74	0.83546	5.1	32.243	1	1	82	4.55182	100.5	62.5	0	8.01764
7813	0	49	175	0	16.8544	54	0	0	0	4379	24	25	39.3	0	15	94.2	2.43601	236	6.10296	82	0.92578	5.4	35.522	3	1	97	5.38447	139	84	0	8.28828
11429	1	58	1	0	16.8593	64.2	0	0	1	756	17	21	45.4	0	21	64.2	1.66021	174	4.49964	55	0.62095	4.942	30.5161	1	1	87	4.82937	88	58	0	7.78009
17021	1	30	90	0	16.8594	74	0	0	1	2017	14	19	55.6	0	20	80	2.0688	214	5.53404	43	0.48547	5.5	36.615	2	1	93	5.16243	112	70	0	7.60065
12447	0	40	122.5	0	16.866	63.7	0	0	0	3404	12	23	48	1	14	70.8	1.83089	170	4.3962	43	0.48547	5.1	32.243	2	1	92	5.10692	99.5	69.5	0	7.58984
20376	0	35	1	0	16.8719	62	0	0	0	364	8	11	43.3	0	10	54	1.39644	141	3.64626	54	0.60966	5	31.15	1	1	90	4.9959	104.5	59	0	7.79565
6136	0	37	0	0	16.8728	58.7	0	0	0	4465	14	16	44.5	0	15	40.4	1.04474	145	3.7497	64	0.72256	5.2	33.336	1	1	86	4.77386	75	46.5	0	7.92008
8670	0	46	0	0	16.8787	61	0	0	0	2128	12	14	44.9	0	11	61.1	1.58005	190	4.9134	86	0.97094	5.1	32.243	1	1	98	5.43998	87.5	57.5	0	8.34617
16802	0	50	1	0	16.8794	62.5	0	0	0	1826	16	20	41.5	0	13	79	2.04294	211	5.45646	36	0.40644	5.6	37.708	1	1	88	4.88488	117	73.5	0	7.36771
14777	0	42	0	0	16.8882	65	0	0	0	1552	12	15	40	0	12	55	1.4223	149	3.85314	21	0.23709	5.2	33.336	1	1	93	5.16243	98.5	56	0	6.88397
2104	1	50	66	0	16.8916	65.5	0	0	1	3818	15	16	53.7	0	13	87.6	2.26534	198	5.12028	64	0.72256	5	31.15	1	1	91	5.05141	100.5	67.5	0	7.9766
10524	1	48	1	0	16.8928	63.6	0	0	1	3583	13	15	50.5	0	22	52.6	1.36024	203	5.24958	53	0.59837	4.8	28.964	1	1	96	5.32896	127	82	0	7.84149
2574	0	47	12	0	16.8929	59	0	0	0	467	15	31	43.3	1	13	90.2	2.33257	193	4.99098	27	0.30483	5.8	39.894	1	1	91	5.05141	111.5	74	0	7.11355
1558	0	42	0	0	16.8957	62.5	0	0	0	814	13	12	47.8	1	10	66.5	1.71969	215	5.5599	41	0.46289	5.2	33.336	1	1	91	5.05141	113.5	71.5	0	7.53128
16341	0	45	0	0	16.896	60.5	0	0	0	1875	16	25	41.7	0	12	71	1.83606	235	6.0771	33	0.37257	5.1	32.243	1	1	88	4.88488	94.5	61	0	7.2807
11865	0	38	1	0	16.8988	62	0	0	0	383	21	22	42.4	1	10	81.1	2.09725	206	5.32716	20	0.2258	5	31.15	1	1	70	3.8857	98	67	0	6.55108
11418	0	47	0	0	16.8993	59.4	0	0	0	651	22	19	43.1	0	10	61.3	1.58522	151	3.90486	41	0.46289	4.942	30.5161	1	1	87	4.82937	91.5	58	0	7.48633
14017	0	51	1	0	16.901	63	0	0	0	1164	21	23	40.5	0	16	90.9	2.35067	236	6.10296	45	0.50805	5.2	33.336	1	1	87	4.82937	114.5	74.5	0	7.57942
16283	0	36	0	0	16.9086	65	0	0	0	329	23	25	47.1	0	16	74	1.91364	190	4.9134	22	0.24838	5.1	32.243	1	1	84	4.66284	89.5	54.5	0	6.82871
16248	1	43	0	0	16.9108	65	0	0	1	2312	17	20	48.7	1	23	60	1.5516	150	3.879	38	0.42902	5.1	32.243	1	1	92	5.10692	113	68.5	0	7.46623
20270	0	35	0	0	16.9145	64	0	0	0	350	12	15	44.5	0	14	77	1.99122	172	4.44792	42	0.47418	5.3	34.429	1	1	83	4.60733	99	56	0	7.46336
15229	0	31	0	0	16.915	64.5	0	0	0	679	11	24	41.8	0	14	60	1.5516	141	3.64626	58	0.65482	5.1	32.243	1	1	88	4.88488	87	55	0	7.84463
20421	0	40	0	0	16.917	71	0	0	0	397	9	16	45.5	0	13	50	1.293	227	5.87022	91	1.02739	5.2	33.336	1	3	93	5.16243	100.5	67.5	0	8.35031
20104	0	66	1	0	16.9175	71	0	0	0	745	14	20	41.7	0	12	67	1.73262	145	3.7497	48	0.54192	5.6	37.708	1	1	101	5.60651	136.5	78.5	0	7.79317
15580	1	35	84	0	16.9224	65	0	0	1	2197	36	30	54.1	0	63	33.6	0.868896	99	2.56014	47	0.53063	4.2	22.406	2	2	88	4.88488	111	65	0	7.63434
19116	0	40	90	0	16.9225	61	0	0	0	1110	11	12	41.5	1	13	89	2.30154	257	6.64602	43	0.48547	5.5	36.615	2	1	102	5.66202	115	81.5	0	7.69303
14912	0	35	1	0	16.924	68	0	0	0	2559	18	18	44.8	0	12	68.9	1.78175	181	4.68066	19	0.21451	4.9	30.057	1	1	87	4.82937	103	72.5	0	6.7172
20509	0	36	0	0	16.9254	66	0	0	0	322	6	13	44.2	0	7	64	1.65504	134	3.46524	30	0.3387	5.5	36.615	1	1	84	4.66284	90	56.5	0	7.13887
9055	1	41	308	0	16.9283	63	0	0	1	4359	15	13	49.5	0	13	52.6	1.36024	175	4.5255	78	0.88062	4.6	26.778	4	3	88	4.88488	85.5	52	0	8.1409
6475	0	40	1	0	16.9304	60.6	0	0	0	4443	10	13	40.1	0	15	51.4	1.3292	185	4.7841	96	1.08384	5	31.15	1	1	88	4.88488	96.5	59	0	8.34854
5108	0	40	0	0	16.9319	64	0	0	0	3652	15	18	41.1	0	9	63.3	1.63694	204	5.27544	64	0.72256	4.84	29.4012	1	1	88	4.88488	109	70	0	7.94307
11912	1	57	154	0	16.9322	71.7	0	0	1	1084	16	16	51.5	0	12	48.8	1.26197	167	4.31862	66	0.74514	5.4	35.522	3	3	90	4.9959	108.5	68	0	7.99632
16057	0	21	1	0	16.9361	63	0	0	0	1834	13	20	43.9	0	16	59	1.52574	156	4.03416	45	0.50805	4.7	27.871	1	3	97	5.38447	103.5	64	0	7.68823
13763	0	29	1	0	16.9385	68	0	0	0	2798	7	12	43.2	0	14	67.1	1.73521	216	5.58576	28	0.31612	5.4	35.522	1	1	85	4.71835	92.5	62.5	0	7.08171
5369	0	25	1	0	16.9396	57.5	0	0	0	1799	21	18	43.8	0	9	78.4	2.02742	177	4.57722	30	0.3387	5.044	31.6309	1	3	89	4.94039	108	47	0	7.19669
7747	0	23	54	0	16.9448	61.2	0	0	0	693	18	14	43	0	8	46.5	1.20249	186	4.80996	99	1.11771	4.6	26.778	1	3	87	4.82937	87.5	53.5	0	8.36788
10156	1	42	2.8	0	16.9458	68.5	0	0	1	4040	9	8	50.6	0	11	42.5	1.09905	159	4.11174	77	0.86933	4.8	28.964	1	3	93	5.16243	82.5	54.5	0	8.18326
16	0	53	18	0	16.95	61.3	0	0	0	4377	19	20	45.7	1	16	63.2	1.63435	194	5.01684	70	0.7903	4.6	26.778	1	1	82	4.55182	111	72	0	7.96207
8324	0	49	21.1	1	16.9531	61.6	0	0	10	392	15	13	43.4	0	14	89.2	2.30671	251	6.49086	106	1.19674	4.7	27.871	1	1	100	5.551	105	73.5	0	8.57546
2025	0	40	0	0	16.9537	58	0	0	0	4355	16	13	41.1	0	6	81.7	2.11276	171	4.42206	53	0.59837	5.6	37.708	1	1	89	4.94039	97.5	65	0	7.76578
5681	1	36	12	0	16.9578	61.8	0	0	1	3312	20	18	46	0	19	55.2	1.42747	204	5.27544	120	1.3548	5.4	35.522	1	3	85	4.71835	94.5	63	0	8.537
5323	1	58	105.5	0	16.9614	64.5	0	0	1	3983	18	16	48.1	1	11	43.2	1.11715	156	4.03416	54	0.60966	5.6	37.708	2	3	92	5.10692	94.5	59.5	0	7.81763
19864	0	42	154	0	16.9629	69	0	0	0	686	9	13	43.1	1	16	85	2.1981	179	4.62894	69	0.77901	5.1	32.243	3	2	87	4.82937	115.5	76	0	8.00687
18688	0	33	0	0	16.9641	62	0	0	0	968	11	9	43.7	0	14	54	1.39644	197	5.09442	84	0.94836	5.9	40.987	1	1	99	5.49549	95	55	0	8.33279
15350	0	34	1	0	16.9668	64	0	0	0	2226	22	25	39.2	0	11	34	0.87924	139	3.59454	56	0.63224	5.1	32.243	1	1	89	4.94039	98.5	63.5	0	7.82084
14537	1	39	0	0	16.967	67	0	0	1	2526	17	21	54	0	19	76.7	1.98346	170	4.3962	34	0.38386	5.5	36.615	1	1	91	5.05141	92	54	0	7.34407
19805	0	34	110	0	16.9676	74	0	0	0	742	8	9	43.6	0	11	83	2.14638	171	4.42206	37	0.41773	5	31.15	2	2	89	4.94039	122	59	0	7.40641
1420	0	50	0	0	16.9718	61	0	0	0	3304	17	24	38.8	0	9	69.9	1.80761	211	5.45646	15	0.16935	5.7	38.801	1	1	95	5.27345	99.5	57.5	0	6.56878
19247	0	46	0	0	16.9726	57	0	0	0	365	9	9	40.2	0	12	106	2.74116	204	5.27544	37	0.41773	5.3	34.429	1	1	83	4.60733	109.5	59.5	0	7.33661
6891	1	50	359.8	0	16.9734	66.3	0	0	1	4329	8	16	52.1	0	36	84.5	2.18517	186	4.80996	168	1.89672	4.5	25.685	4	3	86	4.77386	135	80	0	8.88516
10883	0	26	1	0	16.9815	60.8	0	0	0	728	11	15	42.5	0	14	75	1.9395	176	4.55136	37	0.41773	4.738	28.2863	1	1	87	4.82937	110.5	73	0	7.38368
11820	0	32	36	0	16.9815	65	0	0	0	1857	13	18	42.5	0	12	58.1	1.50247	155	4.0083	43	0.48547	4.8	28.964	1	3	82	4.55182	91	58.5	0	7.47477
4396	0	40	0	0	16.9818	65.2	0	0	0	3668	10	15	43.8	0	9	73.8	1.90847	215	5.5599	55	0.62095	5.248	33.8606	1	1	87	4.82937	111	67	0	7.78009
13133	0	40	1	0	16.9824	64	0	0	0	2918	17	23	41.7	1	17	90.8	2.34809	222	5.74092	22	0.24838	5.2	33.336	1	1	78	4.32978	109	67.5	0	6.7546
7368	0	52	0	0	16.9862	56	0	0	0	3255	20	21	39.4	1	13	71.5	1.84899	201	5.19786	37	0.41773	5.5	36.615	1	1	96	5.32896	121	75	0	7.48212
17756	0	40	2.8	0	16.9947	64	0	0	0	1463	17	15	47	0	16	81	2.09466	150	3.879	34	0.38386	5.6	37.708	1	1	90	4.9959	106	66.5	0	7.33302
19778	0	40	0	0	16.9947	70	0	0	0	784	21	23	47	0	17	104	2.68944	197	5.09442	43	0.48547	4.8	28.964	1	1	88	4.88488	93.5	53.5	0	7.54539
16843	0	39	1	0	16.9958	64	0	0	0	726	11	20	44	0	19	86	2.22396	234	6.05124	35	0.39515	5.1	32.243	1	1	86	4.77386	92.5	60	0	7.31655
12642	0	21	1	0	16.9973	60.5	0	0	0	1960	14	16	41.1	0	11	47.9	1.23869	143	3.69798	35	0.39515	5.1	32.243	1	1	85	4.71835	81.5	52.5	0	7.30485
16670	0	64	0	0	16.9982	81	1	0	100	353	13	23	44.5	0	22	81	2.09466	237	6.12882	61	0.68869	5.5	36.615	1	1	90	4.9959	114	72.5	0	7.91754
2413	1	58	54	0	17.0022	65	0	0	1	412	18	21	49.6	0	20	53.1	1.37317	178	4.60308	68	0.76772	5	31.15	1	1	84	4.66284	107	61.5	0	7.95718
12522	0	38	0	0	17.0029	62.3	0	0	0	3244	14	20	43.8	0	11	56.1	1.45075	224	5.79264	65	0.73385	5.7	38.801	1	1	91	5.05141	100.5	60	0	7.9921
9464	0	25	1	0	17.0065	58	0	0	0	4025	11	13	40.7	0	9	48.9	1.26455	171	4.42206	31	0.34999	4.7	27.871	1	2	94	5.21794	97	66.5	0	7.28413
14863	0	39	84	0	17.0087	61	0	0	0	2641	17	18	46.7	0	17	73.5	1.90071	201	5.19786	73	0.82417	5	31.15	2	1	91	5.05141	120	70	0	8.10817
19332	0	45	0	0	17.0087	68	0	0	0	1070	9	12	46.7	0	13	82	2.12052	268	6.93048	38	0.42902	5.4	35.522	1	1	107	5.93957	130	75	0	7.61727
17168	0	39	0	0	17.0093	63	0	0	0	1836	14	21	41.5	0	13	81	2.09466	213	5.50818	60	0.6774	5.2	33.336	1	1	86	4.77386	92.5	58.5	0	7.85554
5111	0	44	126	0	17.012	63.5	0	0	0	4364	8	16	42.9	0	13	77.3	1.99898	211	5.45646	90	1.0161	4.6	26.778	2	1	85	4.71835	99	59.5	0	8.24931
8299	0	54	0	0	17.0143	56.3	0	0	0	1461	17	16	41.3	0	12	69.6	1.79986	249	6.43914	55	0.62095	5.2	33.336	1	3	80	4.4408	132	79	0	7.69621
13377	1	39	22	0	17.0147	65.5	0	0	1	3128	11	17	51.1	0	14	91	2.35326	195	5.0427	70	0.7903	5.4	35.522	1	3	91	5.05141	100.5	65.5	0	8.06621
16656	0	47	7.7875	0	17.0203	64	0	0	0	1764	23	31	43.3	0	12	77	1.99122	220	5.6892	48	0.54192	5.4	35.522	1	3	85	4.71835	89	60	0	7.62071
10823	0	39	1	0	17.0203	58.8	0	0	0	742	29	27	41.9	0	23	63.9	1.65245	215	5.5599	28	0.31612	5.248	33.8606	1	1	90	4.9959	102.5	68	0	7.13887
16857	0	32	84	0	17.0249	66	0	0	0	1806	7	20	45.4	0	14	60	1.5516	199	5.14614	71	0.80159	4.9	30.057	2	3	94	5.21794	90	56	0	8.11283
8570	0	40	0	0	17.028	62	0	0	0	3364	9	11	37.5	0	15	51.7	1.33696	173	4.47378	70	0.7903	5.5	36.615	1	1	90	4.9959	88.5	56.5	0	8.05516
19014	0	30	1	0	17.0309	66	0	0	0	714	16	15	47.1	0	14	76	1.96536	213	5.50818	95	1.07255	5.3	34.429	1	1	80	4.4408	94.5	61.5	0	8.24276
20666	0	40	0	0	17.0335	63	0	0	0	509	17	18	42.2	0	9	74	1.91364	196	5.06856	30	0.3387	5.3	34.429	1	1	86	4.77386	101	54	0	7.1624
5986	1	50	36	0	17.0343	66	0	0	1	3267	9	17	51.1	0	16	72.7	1.88002	150	3.879	17	0.19193	5.2	33.336	1	3	91	5.05141	130	86	0	6.65093
1377	0	66	0	0	17.0349	62.6	0	0	0	2410	12	20	40.4	0	6	88.2	2.28085	179	4.62894	59	0.66611	5.452	36.0904	1	1	93	5.16243	108.5	60.5	0	7.91699
4071	0	38	84	0	17.0361	64	0	0	0	4365	10	15	46.1	0	13	52.1	1.34731	211	5.45646	52	0.58708	4.9	30.057	2	1	96	5.32896	83.5	54.5	0	7.82244
4696	0	45	0	0	17.0364	61.2	0	0	0	2200	18	15	44.6	0	11	56	1.44816	223	5.76678	66	0.74514	5.1	32.243	1	1	93	5.16243	118	74	0	8.02911
6412	0	36	0	0	17.043	64.9	0	0	0	2434	14	13	42.6	0	9	53.6	1.3861	157	4.06002	39	0.44031	5.1	32.243	1	1	80	4.4408	82.5	51	0	7.35244
5570	0	45	0	0	17.0448	67	0	0	0	3991	13	13	41.8	0	11	72.9	1.88519	219	5.66334	62	0.69998	5.2	33.336	1	1	89	4.94039	95	60	0	7.92262
15653	0	53	40.95	0	17.0517	63	0	0	0	1848	21	24	39.5	1	12	94.2	2.43601	292	7.55112	60	0.6774	5.4	35.522	1	1	83	4.60733	116.5	70.5	0	7.82004
7245	0	39	0	0	17.0522	61	0	0	0	2916	19	22	42.3	1	31	65	1.6809	204	5.27544	52	0.58708	5.1	32.243	1	1	101	5.60651	93	54	0	7.87322
17881	0	53	0	0	17.0549	62	0	0	0	1447	23	18	40.5	0	14	81	2.09466	169	4.37034	61	0.68869	5.2	33.336	1	1	98	5.43998	127.5	79.5	0	8.00269
19421	0	38	0	0	17.0582	65	0	0	0	1073	12	15	42.8	0	15	107	2.76702	217	5.61162	34	0.38386	5.5	36.615	1	1	96	5.32896	107.5	65	0	7.39756
17380	0	35	0	0	17.0631	65	0	0	0	1573	9	18	41.1	0	5	79	2.04294	228	5.89608	26	0.29354	5.2	33.336	1	2	86	4.77386	106.5	62.5	0	7.0193
9270	0	50	0	0	17.0631	65.5	0	0	0	1461	15	20	41.1	1	14	78	2.01708	228	5.89608	41	0.46289	5.4	35.522	1	1	82	4.55182	105.5	66	0	7.42714
5109	0	34	1	0	17.0651	62.5	0	0	0	4350	13	17	49.9	1	9	68	1.75848	198	5.12028	60	0.6774	4.9	30.057	1	1	82	4.55182	96.5	67.5	0	7.80792
19865	0	45	0	0	17.0666	66	0	0	0	794	13	12	41.8	0	22	73	1.88778	223	5.76678	74	0.83546	5.1	32.243	1	3	95	5.27345	96.5	60	0	8.16479
12544	0	40	1	0	17.0708	63.8	0	0	0	3214	10	15	42.4	0	8	44.4	1.14818	153	3.95658	60	0.6774	4.8	28.964	1	1	95	5.27345	112.5	74.5	0	7.95507
321	0	48	0	0	17.0721	58	0	0	0	3652	12	14	41.6	0	8	112.9	2.91959	255	6.5943	40	0.4516	5.2	33.336	1	1	93	5.16243	110.5	66.5	0	7.52833
3898	0	43	0	0	17.0721	66.5	0	0	0	4353	19	19	41.6	1	20	88	2.27568	203	5.24958	40	0.4516	5	31.15	1	1	88	4.88488	96	66	0	7.47307
18517	0	55	136.5	0	17.0775	67	0	0	0	334	16	15	43.5	0	17	109	2.81874	254	6.56844	43	0.48547	5.2	33.336	2	1	89	4.94039	98	63.5	0	7.55669
15828	0	45	0	0	17.0786	62	0	0	0	2170	16	21	44.6	0	12	49	1.26714	168	4.34448	77	0.86933	5.1	32.243	1	1	89	4.94039	103	66	0	8.13929
8857	0	33	1	0	17.0833	58	0	0	0	4347	16	11	38.9	0	21	50.5	1.30593	179	4.62894	33	0.37257	4.9	30.057	1	1	86	4.77386	84	50.5	0	7.25771
9747	0	35	0	0	17.0879	59.5	0	0	0	3983	16	19	43.2	0	9	62.4	1.61366	173	4.47378	22	0.24838	4.9	30.057	1	1	91	5.05141	115.5	74.5	0	6.90875
10920	0	36	1	0	17.0885	65	0	0	0	3444	12	14	41.8	0	16	77.4	2.00156	208	5.37888	34	0.38386	4.942	30.5161	1	1	83	4.60733	117.5	68.5	0	7.25205
13688	1	35	0	0	17.0919	62	0	0	1	449	14	20	45.3	0	17	70.4	1.82054	170	4.3962	22	0.24838	5	31.15	1	1	75	4.16325	89.5	56.5	0	6.71538
13108	0	54	0	0	17.0925	67.5	0	0	0	1426	5	15	42.4	0	10	54.3	1.4042	153	3.95658	43	0.48547	5.7	38.801	1	1	90	4.9959	109	62	0	7.56786
8146	0	40	0	0	17.0934	56	0	0	0	4699	11	13	38	0	14	48	1.24128	167	4.31862	71	0.80159	5.1	32.243	1	1	90	4.9959	108.5	68.5	0	8.06934
7852	0	42	0	0	17.0985	54	0	0	0	368	10	13	37.2	0	9	51.9	1.34213	185	4.7841	50	0.5645	4.8	28.964	1	1	91	5.05141	99	62	0	7.72974
10441	0	54	1	0	17.0994	64.5	0	0	0	1508	14	17	41.4	0	8	65.5	1.69383	216	5.58576	77	0.86933	5.248	33.8606	1	1	83	4.60733	127.5	81.5	0	8.0695
9176	0	39	2.8	0	17.1014	57.5	0	0	0	1868	10	13	42.8	1	8	67.8	1.75331	193	4.99098	36	0.40644	4.6	26.778	1	1	89	4.94039	100	66.5	0	7.37901
7033	0	53	0	0	17.1016	68	0	0	0	737	21	27	42.1	0	16	99	2.56014	241	6.23226	46	0.51934	5.6	37.708	1	2	108	5.99508	127	73.5	0	7.81763
11317	1	37	1	0	17.1045	60.2	0	0	1	369	12	23	45	1	14	72.3	1.86968	232	5.99952	18	0.20322	5	31.15	1	1	96	5.32896	113	71	0	6.76157
17697	0	41	0	0	17.1056	60	0	0	0	1485	12	12	43.9	0	11	78	2.01708	156	4.03416	107	1.20803	5.2	33.336	1	1	82	4.55182	111.5	58.5	0	8.3864
1056	0	44	0	0	17.1078	55.8	0	0	0	2192	29	37	40.1	0	48	60.1	1.55419	187	4.83582	37	0.41773	4.8	28.964	1	1	88	4.88488	94	58	0	7.39511
6758	0	43	0	0	17.1085	59.5	0	0	0	4544	11	10	48	0	7	64.3	1.6628	173	4.47378	69	0.77901	5.1	32.243	1	1	95	5.27345	92.5	56	0	8.09484
17446	0	45	40.95	0	17.1142	61	0	0	0	1787	18	24	42.4	0	11	78	2.01708	191	4.93926	28	0.31612	4.8	28.964	1	1	86	4.77386	114.5	72.5	0	7.0934
11583	0	34	12	0	17.1166	69	0	0	0	2237	10	12	46.6	0	8	50.3	1.30076	168	4.34448	45	0.50805	5.35	34.9755	1	1	89	4.94039	111	70.5	0	7.60215
14924	0	40	1	0	17.1169	66	0	0	0	2559	21	19	44.7	0	16	74.3	1.9214	186	4.80996	25	0.28225	5.2	33.336	1	1	93	5.16243	123	78	0	7.05833
13282	0	58	0	0	17.1173	77.5	0	0	0	770	15	16	48.6	1	13	71.5	1.84899	278	7.18908	62	0.69998	5.7	38.801	1	1	93	5.16243	99	66.5	0	7.96659
830	0	59	0	0	17.1191	57	0	0	0	815	14	12	39.5	0	27	60	1.5516	221	5.71506	91	1.02739	5	31.15	1	1	100	5.551	112	72	0	8.42288
3668	1	33	168	0	17.1201	67	0	0	1	637	12	17	55.1	0	21	85.3	2.20586	169	4.37034	73	0.82417	5.1	32.243	3	3	97	5.38447	121	77.5	0	8.17202
20086	0	35	1	0	17.1209	67	0	0	0	693	14	12	44.6	0	14	77	1.99122	179	4.62894	34	0.38386	5.3	34.429	1	1	85	4.71835	112	66.5	0	7.27586
8007	0	41	12	0	17.1275	60.6	0	0	0	3987	16	15	43.3	0	11	61.4	1.5878	188	4.86168	21	0.23709	5	31.15	1	1	84	4.66284	89.5	59.5	0	6.78219
19817	0	40	5.13333	0	17.1277	64	0	0	0	734	11	19	46.8	1	5	65	1.6809	165	4.2669	30	0.3387	5.4	35.522	1	1	95	5.27345	109	72.5	0	7.26193
8414	0	35	0	0	17.1293	65	0	0	0	1819	12	19	41.1	0	12	65	1.6809	178	4.60308	72	0.81288	5.2	33.336	1	1	85	4.71835	111	74	0	8.02617
7678	0	40	0	0	17.1296	65.3	0	0	0	4038	16	14	45.4	0	11	70.1	1.81279	184	4.75824	33	0.37257	4.9	30.057	1	1	78	4.32978	104.5	68	0	7.16007
15973	0	43	0	0	17.1308	60	0	0	0	805	12	15	46.3	0	14	65	1.6809	256	6.62016	53	0.59837	5.5	36.615	1	1	83	4.60733	106.5	72	0	7.69599
387	1	56	0	0	17.1316	71.6	0	0	1	3336	9	15	50.8	0	16	46.6	1.20508	235	6.0771	169	1.90801	5.4	35.522	1	3	87	4.82937	101	66	0	8.90266
15384	0	51	1	0	17.1326	61	0	0	0	2529	15	19	46.7	0	17	40.2	1.03957	131	3.38766	15	0.16935	5.7	38.801	1	1	103	5.71753	125	81	0	6.64963
14326	0	30	1	0	17.1335	61	0	0	0	1848	19	26	48.3	1	19	82.8	2.14121	228	5.89608	34	0.38386	5.2	33.336	1	1	81	4.49631	83.5	52.5	0	7.22766
13253	1	61	0	0	17.1345	66	0	0	1	2988	13	18	43.7	0	19	58	1.49988	198	5.12028	34	0.38386	5.5	36.615	1	3	95	5.27345	125.5	77.5	0	7.38709
11863	0	28	1	0	17.1355	68	0	0	0	2927	11	14	46.2	0	11	62.1	1.60591	156	4.03416	37	0.41773	4.8	28.964	1	1	89	4.94039	94.5	56	0	7.40641
14913	0	37	1	0	17.1382	63	0	0	0	2311	12	17	43.6	0	10	85	2.1981	191	4.93926	24	0.27096	4.9	30.057	1	1	83	4.60733	90	63	0	6.90375
7766	0	27	1	0	17.1401	65.5	0	0	0	1120	15	18	46.1	0	16	64.3	1.6628	165	4.2669	35	0.39515	5	31.15	1	1	89	4.94039	88.5	57	0	7.35084
85	1	46	308	0	17.1439	69	0	0	1	1491	20	21	57.1	0	14	62.6	1.61884	174	4.49964	83	0.93707	5.5	36.615	4	3	93	5.16243	97	63.5	0	8.25829
15351	0	44	0	0	17.1446	63.5	0	0	0	2033	16	18	44	0	11	79.9	2.06621	163	4.21518	14	0.15806	4.9	30.057	1	1	76	4.21876	105	70.5	0	6.27664
19720	0	33	18.2	0	17.1461	62	0	0	0	734	11	14	40.4	0	16	69	1.78434	198	5.12028	56	0.63224	5.2	33.336	1	1	83	4.60733	96.5	66.5	0	7.75105
20872	1	34	0	0	17.1497	63	0	0	1	347	2	10	47.6	0	16	59	1.52574	188	4.86168	63	0.71127	5.2	33.336	1	3	98	5.43998	103.5	60.5	0	8.03496
13504	1	40	105	0	17.1507	70	0	0	1	2870	11	12	49.1	1	15	61.2	1.58263	142	3.67212	36	0.40644	5.2	33.336	2	3	94	5.21794	99	60.5	0	7.43367
17456	0	36	1	0	17.151	69	0	0	0	1821	23	25	44.9	0	9	59	1.52574	149	3.85314	37	0.41773	4.9	30.057	1	1	103	5.71753	128	63	0	7.5525
15036	0	35	0	0	17.1561	67.5	0	0	0	451	15	16	43.1	0	15	82.9	2.14379	192	4.96512	24	0.27096	5.5	36.615	1	1	91	5.05141	105	71	0	6.99577
13364	0	41	168	0	17.1563	63.5	0	0	0	2618	15	18	46.2	0	15	69.4	1.79468	180	4.6548	38	0.42902	4.9	30.057	3	1	91	5.05141	103	63	0	7.4553
10917	0	38	0	0	17.1571	61.5	0	0	0	3683	12	13	41.7	0	17	58.7	1.51798	158	4.08588	71	0.80159	5.044	31.6309	1	1	91	5.05141	92.5	59	0	8.08039
8838	0	31	90	0	17.1578	61.5	0	0	0	4373	8	18	42.4	0	21	64.4	1.66538	182	4.70652	43	0.48547	4.7	27.871	2	1	88	4.88488	107	74.5	0	7.54539
19043	0	77	0	0	17.1592	64	0	0	0	1228	15	23	38.3	1	11	92	2.37912	227	5.87022	40	0.4516	5.3	34.429	1	1	97	5.38447	126.5	65.5	0	7.57044
18571	0	42	0	0	17.1594	63.5	0	0	0	1141	14	12	45.2	0	10	87	2.24982	200	5.172	29	0.32741	5.4	35.522	1	1	100	5.551	98	58.5	0	7.27932
10916	0	38	0	0	17.1596	63	0	0	0	3613	17	19	43	0	16	63.2	1.63435	153	3.95658	46	0.51934	4.84	29.4012	1	1	84	4.66284	96.5	59.5	0	7.56631
9988	1	45	245	0	17.1606	66.3	0	0	1	3664	17	21	54.8	0	13	51	1.31886	171	4.42206	44	0.49676	5.4	35.522	3	3	90	4.9959	111.5	71.5	0	7.59085
11127	0	35	0	0	17.1643	62.2	0	0	0	3626	11	17	46.9	0	10	82.1	2.12311	214	5.53404	49	0.55321	5.044	31.6309	1	1	80	4.4408	106	50.5	0	7.5807
7743	0	23	1	0	17.1664	58.7	0	0	0	1092	13	15	42.8	1	11	62.9	1.62659	173	4.47378	23	0.25967	4.8	28.964	1	1	80	4.4408	93	60.5	0	6.82437
15884	1	35	0	0	17.1674	64	0	0	1	2240	36	26	48.8	0	20	61	1.57746	172	4.44792	62	0.69998	5.2	33.336	1	1	92	5.10692	119	72.5	0	7.95578
17708	0	39	1	0	17.168	61	0	0	0	581	10	7	45	0	10	87	2.24982	166	4.29276	27	0.30483	5.2	33.336	1	1	87	4.82937	107	69.5	0	7.0686
10615	1	42	12	0	17.1689	65.5	0	0	1	3950	11	12	52.1	0	11	52.1	1.34731	192	4.96512	67	0.75643	5.35	34.9755	1	3	87	4.82937	119	71.5	0	7.97745
18885	0	34	1	0	17.1729	69	0	0	0	839	24	11	48.7	0	15	65	1.6809	195	5.0427	138	1.55802	5.1	32.243	1	1	92	5.10692	107.5	68.5	0	8.7559
14539	0	31	1	0	17.1742	70	0	0	0	2725	25	18	49.4	0	14	64.5	1.66797	140	3.6204	25	0.28225	5.5	36.615	1	1	83	4.60733	79.5	52.5	0	6.94457
5754	0	38	84	0	17.1764	63.8	0	0	0	252	10	16	42.5	0	13	63.6	1.6447	157	4.06002	44	0.49676	4.8	28.964	2	1	90	4.9959	88	56.5	0	7.59085
15329	0	51	36	0	17.1773	61.5	0	0	0	2199	11	18	46.2	0	15	72	1.86192	203	5.24958	38	0.42902	5.5	36.615	1	1	85	4.71835	108	75.5	0	7.38709
9681	0	40	0	0	17.1778	58.5	0	0	0	4066	15	17	43.1	0	18	71.2	1.84123	194	5.01684	38	0.42902	4.8	28.964	1	1	86	4.77386	107.5	69	0	7.39879
4759	0	45	0	0	17.1778	64	0	0	0	4137	14	15	43.1	0	8	48.8	1.26197	229	5.92194	67	0.75643	5.6	37.708	1	1	89	4.94039	98.5	60	0	8.00018
5437	1	40	36	0	17.1805	67	0	0	1	4342	17	12	53.4	0	12	52.9	1.36799	157	4.06002	45	0.50805	5.2	33.336	1	1	91	5.05141	101	67.5	0	7.62437
8035	0	40	1	0	17.1837	63.7	0	0	0	3506	9	15	40.7	0	10	41	1.06026	164	4.24104	42	0.47418	5.7	38.801	1	1	92	5.10692	108.5	65.5	0	7.56631
13932	0	36	0	0	17.1916	63	0	0	0	2927	9	13	42.7	0	14	56.9	1.47143	214	5.53404	45	0.50805	4.9	30.057	1	1	80	4.4408	98	51	0	7.49554
7259	0	54	0	0	17.1931	55.8	0	0	0	4324	18	21	41.2	1	15	65.7	1.699	240	6.2064	54	0.60966	5.1	32.243	1	1	68	3.77468	77	46	0	7.51534
7856	0	57	220	0	17.1939	59	0	0	0	2524	18	20	39.1	0	15	87.1	2.25241	229	5.92194	275	3.10475	4.9	30.057	3	3	85	4.71835	86	58.5	0	9.36628
14294	0	35	0	0	17.1954	60	0	0	0	2916	16	19	40.2	0	13	62.5	1.61625	167	4.31862	30	0.3387	5.1	32.243	1	1	83	4.60733	90.5	58.5	0	7.12689
17907	0	42	0	0	17.1999	62	0	0	0	657	9	14	46.6	0	8	59	1.52574	145	3.7497	31	0.34999	5.2	33.336	1	3	98	5.43998	104	58	0	7.32581
12051	0	35	0	0	17.2028	66.4	0	0	0	3412	12	14	43.6	1	11	59	1.52574	183	4.73238	50	0.5645	5.1	32.243	1	1	78	4.32978	103	63.5	0	7.57558
16708	1	37	126	0	17.2059	65	0	0	1	1808	20	23	49.2	0	16	60	1.5516	159	4.11174	19	0.21451	5.1	32.243	2	1	94	5.21794	98	64.5	0	6.79459
15951	0	39	0	0	17.2064	62	0	0	0	1834	15	25	38.2	0	18	61	1.57746	172	4.44792	14	0.15806	5.2	33.336	1	1	85	4.71835	100	60	0	6.38856
8830	0	43	36	0	17.209	62.2	0	0	0	4457	15	17	44	0	8	57.5	1.48695	141	3.64626	39	0.44031	5.8	39.894	1	1	89	4.94039	102.5	64	0	7.45905
7825	0	48	0	0	17.2098	61.4	0	0	0	1477	24	24	41.4	0	7	73.6	1.9033	212	5.48232	28	0.31612	4.8	28.964	1	1	84	4.66284	113.5	71	0	7.06987
20562	0	43	126	0	17.2115	60.5	0	0	0	371	8	17	39.4	0	13	94	2.43084	209	5.40474	19	0.21451	5.3	34.429	2	1	85	4.71835	106	61.5	0	6.69394
15190	0	30	12	0	17.2156	65	0	0	0	761	18	19	40.3	0	18	71.9	1.85933	168	4.34448	31	0.34999	4.9	30.057	1	2	80	4.4408	103.5	64	0	7.12287
4732	1	43	1	0	17.2173	83.5	0	0	1	4375	27	21	49	0	56	70.9	1.83347	236	6.10296	50	0.5645	5.2	33.336	1	1	95	5.27345	107.5	70	0	7.77275
135	1	55	36	0	17.2191	65	0	0	1	2183	19	17	44.8	0	11	49.8	1.28783	196	5.06856	53	0.59837	5.7	38.801	1	3	95	5.27345	110.5	76.5	0	7.83102
4376	1	51	0	0	17.224	68.6	0	0	1	2915	19	20	46.1	0	12	34.1	0.881826	191	4.93926	82	0.92578	4.6	26.778	1	1	90	4.9959	103	66.5	0	8.21338
11262	0	51	81.3	0	17.2263	64.5	0	0	0	1091	13	25	41.6	1	16	87.5	2.26275	200	5.172	25	0.28225	5.248	33.8606	2	1	95	5.27345	104.5	68.5	0	7.07961
15635	1	33	90	0	17.2281	72	0	0	1	372	21	21	52.4	0	16	48.7	1.25938	160	4.1376	40	0.4516	5	31.15	2	3	90	4.9959	86	55	0	7.49554
20022	0	30	0	0	17.2317	64	0	0	0	697	16	12	44.5	0	10	64	1.65504	174	4.49964	76	0.85804	5.2	33.336	1	1	96	5.32896	126	75	0	8.20193
8047	1	58	0	0	17.2343	64	0	0	1	4317	15	16	48.7	1	15	63.9	1.65245	214	5.53404	78	0.88062	5.2	33.336	1	3	91	5.05141	100	67.5	0	8.17442
12956	0	55	68.25	0	17.2351	67.2	0	0	0	2640	15	25	49.4	1	11	67.3	1.74038	205	5.3013	32	0.36128	5.1	32.243	1	1	108	5.99508	142	79.5	0	7.45472
930	0	48	0	0	17.2376	60.4	0	0	0	4391	13	21	47.5	0	7	69.4	1.79468	192	4.96512	48	0.54192	5.6	37.708	1	1	97	5.38447	103.5	69	0	7.75276
13416	0	38	168	0	17.2377	62	0	0	0	2442	8	19	41.2	0	12	71.3	1.84382	153	3.95658	80	0.9032	5.2	33.336	3	1	92	5.10692	95	62	0	8.21067
8818	0	31	0	0	17.2384	57	0	0	0	729	6	12	43.8	0	12	62	1.60332	158	4.08588	59	0.66611	5.4	35.522	1	1	92	5.10692	97.5	61	0	7.90618
1677	1	56	8.4	0	17.2412	72.1	0	0	1	1503	13	13	52.5	0	8	43.1	1.11457	215	5.5599	61	0.68869	5.2	33.336	1	3	99	5.49549	115.5	69.5	0	8.01285
14206	0	34	0	0	17.2425	66	0	0	0	2753	15	19	41.8	0	16	63.1	1.63177	148	3.82728	33	0.37257	5.4	35.522	1	1	92	5.10692	94	61	0	7.32515
19630	0	30	0	0	17.243	64	0	0	0	925	9	8	43.1	0	11	86	2.22396	186	4.80996	54	0.60966	5.6	37.708	1	1	90	4.9959	126.5	70	0	7.79565
6328	0	43	36	0	17.2447	58.2	0	0	0	4377	13	19	44.7	0	11	67.9	1.75589	146	3.77556	57	0.64353	4.9	30.057	1	1	83	4.60733	106.5	67	0	7.76874
13711	1	57	280	0	17.2467	69.5	0	0	1	413	16	23	49.2	0	16	69.2	1.78951	185	4.7841	33	0.37257	5	31.15	4	3	93	5.16243	127	91.5	0	7.33596
6447	0	39	1	0	17.2481	59	0	0	0	4037	13	19	44.1	0	18	81.8	2.11535	207	5.35302	19	0.21451	4.8	28.964	1	1	83	4.60733	98.5	58.5	0	6.67013
7699	0	33	0	0	17.2487	63.5	0	0	0	3689	15	21	45.1	1	13	59	1.52574	248	6.41328	56	0.63224	5.248	33.8606	1	1	93	5.16243	115.5	73.5	0	7.8648
20131	0	29	0	0	17.249	62	0	0	0	518	8	17	44.6	0	9	70	1.8102	162	4.18932	29	0.32741	5.4	35.522	1	1	77	4.27427	84	55.5	0	7.01795
15740	0	39	1	0	17.2572	66.5	0	0	0	406	11	17	42.7	0	10	64.7	1.67314	182	4.70652	30	0.3387	5.8	39.894	1	1	93	5.16243	99.5	66	0	7.24065
13969	0	51	0	0	17.2584	70	0	0	0	2184	10	11	42	0	10	48	1.24128	203	5.24958	52	0.58708	5.4	35.522	1	1	87	4.82937	100	62.5	0	7.724
6340	0	35	1	0	17.2607	59.5	0	0	0	1477	19	17	42.6	1	12	85.2	2.20327	165	4.2669	27	0.30483	5.248	33.8606	1	1	87	4.82937	96.5	58.5	0	7.0686
3624	0	52	0	0	17.2615	63.5	0	0	0	4340	18	15	41.9	0	11	54.2	1.40161	221	5.71506	66	0.74514	5	31.15	1	1	73	4.05223	96	61	0	7.78697
2137	0	34	0	0	17.2618	57.5	0	0	0	3652	13	15	44.8	0	8	56.5	1.46109	178	4.60308	50	0.5645	5.4	35.522	1	1	76	4.21876	95	51.5	0	7.54961
14492	1	26	0	0	17.2673	62.5	0	0	1	1897	19	18	52.7	0	17	39.7	1.02664	155	4.0083	100	1.129	5.2	33.336	1	3	93	5.16243	119	67.5	0	8.44462
15742	0	21	8.4	0	17.2678	63	0	0	0	1391	16	20	46.5	0	13	68	1.75848	165	4.2669	31	0.34999	5.2	33.336	1	1	76	4.21876	96.5	56.5	0	7.07157
17953	0	32	0	0	17.2734	69.5	0	0	0	1475	12	9	40.7	0	11	76	1.96536	186	4.80996	66	0.74514	5.4	35.522	1	1	85	4.71835	94	58.5	0	7.93916
5080	0	35	12	0	17.2738	65	0	0	0	2762	17	11	44	0	9	64.8	1.67573	163	4.21518	40	0.4516	4.7	27.871	1	1	79	4.38529	89.5	55.5	0	7.36518
13604	0	39	0	0	17.2741	68	0	0	0	469	17	19	47.2	0	19	70.3	1.81796	221	5.71506	42	0.47418	5.1	32.243	1	1	84	4.66284	101.5	66	0	7.47534
19524	0	33	0	0	17.2754	68.5	0	0	0	756	12	10	48.7	0	14	65	1.6809	177	4.57722	26	0.29354	5.3	34.429	1	1	98	5.43998	119	63.5	0	7.14992
3783	1	58	18	0	17.2765	65.8	0	0	1	2041	10	12	50.4	0	11	56.8	1.46885	171	4.42206	32	0.36128	5.1	32.243	1	1	105	5.82855	121.5	79	0	7.42655
3723	0	35	0	0	17.2776	61.8	0	0	0	4047	21	23	46.3	1	7	75.5	1.95243	227	5.87022	45	0.50805	4.7	27.871	1	1	70	3.8857	84	47	0	7.36201
7848	0	36	0	0	17.2795	57.5	0	0	0	3648	12	18	41.3	0	5	69.6	1.79986	176	4.55136	64	0.72256	5	31.15	1	1	86	4.77386	102.5	61	0	7.92008
20166	1	36	0	0	17.2858	66	0	0	1	749	19	22	55.2	0	11	81	2.09466	209	5.40474	35	0.39515	5.3	34.429	1	1	97	5.38447	115.5	58.5	0	7.43691
12397	0	39	1	0	17.2888	72.5	0	0	0	3288	7	12	50.2	0	10	50.9	1.31627	158	4.08588	57	0.64353	5.2	33.336	1	1	82	4.55182	96	64	0	7.75662
8983	0	42	245	0	17.2959	62.8	0	0	0	1030	8	9	45	0	10	60.1	1.55419	176	4.55136	61	0.68869	4.7	27.871	3	3	83	4.60733	87	55	0	7.83657
19122	0	49	0	0	17.2963	74	0	0	0	1092	11	10	49.4	0	10	85	2.1981	218	5.63748	60	0.6774	5.1	32.243	1	1	88	4.88488	103.5	63	0	7.87853
19397	1	54	31.5	0	17.2979	67	0	0	1	374	18	16	48.3	0	15	69	1.78434	198	5.12028	56	0.63224	5.5	36.615	1	2	108	5.99508	112.5	68.5	0	8.01434
15771	0	45	0	0	17.3005	64	0	0	0	2058	10	17	44.4	0	11	51	1.31886	209	5.40474	62	0.69998	5.1	32.243	1	1	90	4.9959	103.5	74	0	7.9338
6291	0	37	0	0	17.3011	59.6	0	0	0	2914	21	17	43.3	0	10	45.7	1.1818	127	3.28422	16	0.18064	5.1	32.243	1	1	87	4.82937	80.5	55	0	6.54535
9156	0	46	0	0	17.3035	60	0	0	0	4332	23	27	43.8	0	12	61.4	1.5878	159	4.11174	36	0.40644	4.9	30.057	1	1	93	5.16243	100	67	0	7.42297
13553	1	59	154	0	17.3048	75	0	0	1	2027	15	21	47.8	0	37	53.2	1.37575	195	5.0427	77	0.86933	5.4	35.522	3	3	103	5.71753	132.5	83	0	8.28539
2498	1	49	1	0	17.3076	69	0	0	1	1779	10	18	51.8	0	10	55.6	1.43782	230	5.9478	53	0.59837	4.7	27.871	1	2	94	5.21794	91.5	63.5	0	7.82044
2911	1	53	2.8	0	17.3084	73.1	0	0	1	4016	21	18	45.2	0	11	40.5	1.04733	139	3.59454	44	0.49676	5.1	32.243	1	1	102	5.66202	108	70	0	7.71602
5007	0	43	60	0	17.3087	59.4	0	0	0	4107	14	19	43.1	0	11	91.2	2.35843	220	5.6892	72	0.81288	4.6	26.778	1	1	81	4.49631	86	56	0	7.97797
17122	1	45	1	0	17.3141	64	0	0	1	1828	11	30	55.6	0	16	53	1.37058	167	4.31862	58	0.65482	5.7	38.801	1	1	86	4.77386	79	55.5	0	7.82164
16240	0	38	0	0	17.315	65.5	0	0	0	2184	9	16	42.3	1	14	62	1.60332	168	4.34448	36	0.40644	5.1	32.243	1	1	77	4.27427	104	53	0	7.23418
14320	0	51	1	0	17.3159	65.5	0	0	0	378	12	16	45.5	0	12	48.4	1.25162	248	6.41328	107	1.20803	5.5	36.615	1	1	88	4.88488	115.5	75.5	0	8.45702
13327	0	37	0	0	17.3178	63.5	0	0	0	832	10	17	44.5	0	11	67.3	1.74038	225	5.8185	33	0.37257	5.2	33.336	1	1	83	4.60733	100.5	63.5	0	7.2222
509	0	43	0	0	17.3192	59.5	0	0	0	4425	13	10	43.4	0	11	58.5	1.51281	197	5.09442	104	1.17416	4.7	27.871	1	1	102	5.66202	105	65	0	8.57622
10731	1	35	84	0	17.3206	66	0	0	1	3663	12	15	52.5	0	8	66.6	1.72228	209	5.40474	72	0.81288	4.84	29.4012	2	2	100	5.551	113	65.5	0	8.18869
18212	0	32	120	0	17.3206	65	0	0	0	1183	11	8	45.4	0	13	87	2.24982	151	3.90486	40	0.4516	5	31.15	2	1	86	4.77386	104	57	0	7.45008
15313	0	38	0	0	17.3223	65	0	0	0	2459	20	19	48.6	0	12	60.2	1.55677	165	4.2669	23	0.25967	5	31.15	1	1	88	4.88488	114.5	70.5	0	6.91968
14449	0	57	1	0	17.323	65	0	0	0	1078	17	16	43.3	0	11	69.9	1.80761	168	4.34448	73	0.82417	5.5	36.615	1	1	89	4.94039	111	68	0	8.08595
8255	0	35	1	0	17.3252	59	0	0	0	3977	17	22	45.3	0	6	60.3	1.55936	251	6.49086	108	1.21932	4.6	26.778	1	1	83	4.60733	117.5	67	0	8.40782
9915	0	38	1	0	17.3298	65	0	0	0	360	18	19	46.1	0	3	62.5	1.61625	143	3.69798	22	0.24838	4.9	30.057	1	2	88	4.88488	100.5	67	0	6.87523
17166	0	41	36	0	17.3298	73.5	0	0	0	403	12	22	45.2	0	17	85	2.1981	206	5.32716	42	0.47418	5.1	32.243	1	1	95	5.27345	122	80	0	7.5984
12930	0	35	1	0	17.3306	60	0	0	0	3211	9	13	43.1	0	8	48.7	1.25938	137	3.54282	35	0.39515	5.2	33.336	1	1	85	4.71835	115.5	75.5	0	7.30485
2013	0	38	84	0	17.3337	58.5	0	0	0	4412	8	12	42.4	0	8	68	1.75848	175	4.5255	45	0.50805	4.9	30.057	2	3	95	5.27345	91	54.5	0	7.66739
18765	0	54	84	0	17.3347	70	0	0	0	1108	16	18	46	0	14	97	2.50842	195	5.0427	58	0.65482	5.3	34.429	2	3	84	4.66284	108	74.5	0	7.79811
2180	0	37	0	0	17.3373	61.2	0	0	0	4375	12	13	45.5	0	13	81.8	2.11535	221	5.71506	69	0.77901	4.9	30.057	1	1	94	5.21794	99.5	59.5	0	8.08425
5997	1	45	0	0	17.341	65.5	0	0	1	2506	32	16	47.9	0	11	37	0.95682	151	3.90486	52	0.58708	5	31.15	1	1	94	5.21794	111.5	64.5	0	7.80139
3808	0	40	0	0	17.345	71.8	0	0	0	1968	16	14	43.3	0	17	56.6	1.46368	141	3.64626	64	0.72256	4.5	25.685	1	1	102	5.66202	98.5	63	0	8.09071
14923	0	23	1	0	17.3461	66	0	0	0	2172	17	18	46.2	0	13	61.8	1.59815	144	3.72384	55	0.62095	5	31.15	1	1	92	5.10692	96	52	0	7.83597
19439	0	48	1	0	17.3497	65	0	0	0	1079	10	9	41.2	0	16	55	1.4223	211	5.45646	118	1.33222	5.3	34.429	1	1	85	4.71835	111.5	69.5	0	8.52019
598	0	54	1	0	17.3524	59.8	0	0	0	1823	11	17	42.5	0	7	32.8	0.848208	210	5.4306	86	0.97094	5.6	37.708	1	1	93	5.16243	126	78	0	8.2938
8633	0	50	1	0	17.3526	61.3	0	0	0	3297	14	15	41.1	0	9	63.3	1.63694	160	4.1376	40	0.4516	5.2	33.336	1	1	86	4.77386	112	72	0	7.45008
253	0	39	180	0	17.3545	66.8	0	0	0	1684	19	20	48.4	0	16	97.2	2.51359	222	5.74092	74	0.83546	5.2	33.336	3	3	88	4.88488	100	61.5	0	8.08825
2772	0	36	0	0	17.3551	64	0	0	0	3689	11	18	43.6	0	7	54.5	1.40937	193	4.99098	64	0.72256	4.84	29.4012	1	1	89	4.94039	105.5	60	0	7.95437
19252	0	52	0	0	17.3601	63	0	0	0	1054	19	19	41.6	0	22	104	2.68944	237	6.12882	49	0.55321	5.7	38.801	1	1	94	5.21794	114	65	0	7.74197
2280	0	44	0	0	17.3638	62.8	0	0	0	4392	13	19	42.8	0	18	66.7	1.72486	266	6.87876	123	1.38867	5	31.15	1	1	99	5.49549	142	94.5	0	8.71416
15221	1	67	132	0	17.365	63	0	0	1	2318	17	16	44.9	0	15	50.2	1.29817	156	4.03416	102	1.15158	5.4	35.522	2	3	82	4.55182	118	70.5	0	8.33854
3971	1	47	1	0	17.3664	68.2	0	0	1	1825	13	21	50.9	0	15	75.6	1.95502	198	5.12028	54	0.60966	5.1	32.243	1	3	93	5.16243	96.5	58	0	7.82844
17299	0	51	12	0	17.367	65	0	0	0	1847	31	27	43.3	0	18	99	2.56014	264	6.82704	23	0.25967	5.2	33.336	1	1	80	4.4408	111	72	0	6.82437
8127	0	39	120	0	17.3685	70.5	0	0	0	726	15	15	49.9	0	17	57.7	1.49212	163	4.21518	37	0.41773	5.2	33.336	2	1	89	4.94039	91.5	56.5	0	7.40641
15185	0	31	1	0	17.3686	60.5	0	0	0	2368	13	18	47	0	12	79	2.04294	205	5.3013	59	0.66611	5.1	32.243	1	1	95	5.27345	108.5	70	0	7.93827
4196	0	25	0	0	17.374	69	0	0	0	4208	9	16	44.7	0	4	59.9	1.54901	230	5.9478	55	0.62095	5.4	35.522	1	2	80	4.4408	93.5	58.5	0	7.69621
12048	0	35	0	0	17.374	64.7	0	0	0	2189	14	17	44.2	0	12	70.6	1.82572	170	4.3962	25	0.28225	5.2	33.336	1	1	85	4.71835	111.5	71.5	0	6.96838
10108	0	25	1	0	17.3752	61.3	0	0	0	3809	9	13	41.1	0	17	51	1.31886	166	4.29276	26	0.29354	5.1	32.243	1	1	85	4.71835	117	71	0	7.0076
1629	1	58	4.2	0	17.3753	69.5	0	0	1	3018	19	15	48.4	0	18	43.6	1.1275	236	6.10296	306	3.45474	5.2	33.336	1	3	84	4.66284	142.5	87.5	0	9.46125
20134	0	22	1	0	17.3817	66	0	0	0	364	6	13	42.3	0	16	50	1.293	174	4.49964	71	0.80159	5.3	34.429	1	1	86	4.77386	96.5	62	0	8.02388
18730	0	36	0	0	17.3844	63	0	0	0	1099	7	9	46.7	0	11	38	0.98268	153	3.95658	54	0.60966	5.5	36.615	1	1	93	5.16243	103	68.5	0	7.82844
19236	0	48	1	0	17.3844	67	0	0	0	412	39	21	46.7	1	45	78	2.01708	181	4.68066	45	0.50805	5.6	37.708	1	1	98	5.43998	100.5	59.5	0	7.69848
1560	1	49	0	0	17.3857	67	0	0	1	3803	20	23	50.6	0	17	43.2	1.11715	237	6.12882	165	1.86285	5.044	31.6309	1	1	96	5.32896	117	66	0	8.97715
7421	0	43	1	0	17.3866	59	0	0	0	4462	16	16	44.9	0	13	61.4	1.5878	226	5.84436	67	0.75643	5	31.15	1	1	86	4.77386	105.5	65	0	7.96589
19545	1	35	18	0	17.3872	74	0	0	1	736	11	15	62.9	0	11	50	1.293	157	4.06002	44	0.49676	5	31.15	1	3	91	5.05141	106	62	0	7.6019
2169	0	51	60	0	17.389	56.7	0	0	0	2391	25	21	43.3	1	10	74.6	1.92916	185	4.7841	92	1.03868	4.7	27.871	1	1	92	5.10692	103	65	0	8.35043
1668	0	38	0	0	17.3978	58.2	0	0	0	2590	13	15	41.1	0	6	78	2.01708	195	5.0427	38	0.42902	5.5	36.615	1	1	96	5.32896	102.5	69.5	0	7.50879
17113	0	39	113.75	0	17.3987	67.5	0	0	0	715	16	18	46	0	17	128	3.31008	269	6.95634	35	0.39515	5.1	32.243	2	1	86	4.77386	132	84.5	0	7.31655
12744	0	59	1	0	17.401	61	0	0	0	741	14	22	39.1	0	9	59.3	1.5335	189	4.88754	98	1.10642	5.5	36.615	1	3	88	4.88488	110	67.5	0	8.36916
1119	1	54	54	0	17.4044	62	0	0	1	2516	15	20	44	0	11	36.8	0.951648	239	6.18054	117	1.32093	5.1	32.243	1	3	77	4.27427	92.5	58.5	0	8.41283
11144	0	27	0	0	17.4046	66	0	0	0	3682	8	13	44.5	0	7	66.4	1.7171	167	4.31862	23	0.25967	5.146	32.7458	1	1	90	4.9959	105.5	60.5	0	6.94216
17684	0	39	54	0	17.4071	64	0	0	0	280	8	10	43.4	0	19	90	2.3274	232	5.99952	50	0.5645	5.1	32.243	1	2	89	4.94039	104	63.5	0	7.70751
19350	0	32	0	0	17.4105	68	0	0	0	348	13	10	47.4	0	19	84	2.17224	158	4.08588	28	0.31612	5.4	35.522	1	1	86	4.77386	103	64.5	0	7.0934
11958	0	35	1	0	17.4109	59.7	0	0	0	749	14	16	42.1	0	10	59.3	1.5335	188	4.86168	62	0.69998	5	31.15	1	1	76	4.21876	98.5	55	0	7.76472
10607	0	38	1	0	17.4143	58.8	0	0	0	1827	19	21	42	1	15	64	1.65504	165	4.2669	17	0.19193	4.8	28.964	1	1	92	5.10692	126.5	81	0	6.66185
4914	0	43	0	0	17.4143	67	0	0	0	4377	12	15	42	0	9	87.1	2.25241	222	5.74092	93	1.04997	5.4	35.522	1	1	84	4.66284	132.5	82	0	8.27027
17794	0	35	0	0	17.4174	67	0	0	0	1717	9	11	44.7	0	11	91	2.35326	210	5.4306	22	0.24838	4.9	30.057	1	1	86	4.77386	86	52	0	6.85224
6141	0	39	0	0	17.4214	60	0	0	0	4391	12	12	47.2	0	10	71.7	1.85416	174	4.49964	34	0.38386	5	31.15	1	1	81	4.49631	93	54.5	0	7.22766
14293	1	37	245	0	17.4228	64.5	0	0	1	2916	15	24	48.3	0	16	76.9	1.98863	161	4.16346	24	0.27096	5.4	35.522	3	2	78	4.32978	127	78.5	0	6.84162
1163	0	41	90	0	17.4233	67	0	0	0	2823	12	13	49	0	9	83.6	2.1619	220	5.6892	42	0.47418	4.8	28.964	2	2	86	4.77386	95.5	62.5	0	7.49887
16509	0	35	0	0	17.4243	65	0	0	0	1870	12	24	41.7	0	13	64	1.65504	175	4.5255	14	0.15806	5.5	36.615	1	1	94	5.21794	92	58.5	0	6.4892
1498	0	46	0	0	17.4304	64.3	0	0	0	2948	19	17	47.8	0	10	73.9	1.91105	189	4.88754	37	0.41773	4.8	28.964	1	1	85	4.71835	100.5	62.5	0	7.36042
16065	0	39	2.8	0	17.4304	67	0	0	0	2190	13	17	47.8	0	13	67	1.73262	169	4.37034	34	0.38386	5.1	32.243	1	1	87	4.82937	110.5	60.5	0	7.29912
12276	1	37	18	0	17.4311	70.5	0	0	1	3286	14	15	53.2	0	9	49.4	1.27748	177	4.57722	54	0.60966	5.1	32.243	1	1	92	5.10692	136.5	81.5	0	7.81763
11470	1	39	1	0	17.4344	66	0	0	1	3610	20	20	52.3	0	14	47.2	1.22059	160	4.1376	57	0.64353	5.044	31.6309	1	1	91	5.05141	101.5	64	0	7.86076
685	1	57	0	0	17.4349	66.5	0	0	1	1096	16	12	52	0	13	32.8	0.848208	223	5.76678	100	1.129	5.2	33.336	1	3	91	5.05141	103.5	67	0	8.42288
1120	1	66	280	0	17.4352	71.8	0	0	1	364	13	17	48.8	1	12	61.9	1.60073	231	5.97366	91	1.02739	5	31.15	4	1	87	4.82937	103	63.5	0	8.28362
14451	0	36	1	0	17.4371	67	0	0	0	2543	14	12	43.2	0	13	57.5	1.48695	128	3.31008	23	0.25967	4.8	28.964	1	1	85	4.71835	101.5	62.5	0	6.885
17695	0	37	0	0	17.4378	63	0	0	0	1435	14	11	42.6	0	14	75	1.9395	172	4.44792	42	0.47418	5.2	33.336	1	1	83	4.60733	105.5	66.5	0	7.46336
15798	1	59	154	0	17.438	61	0	0	1	1040	8	23	49.1	0	15	63	1.62918	190	4.9134	35	0.39515	5.1	32.243	3	2	88	4.88488	119	75.5	0	7.33954
288	0	39	0	0	17.4399	61.6	0	0	0	2931	16	15	45.6	0	14	69.4	1.79468	228	5.89608	65	0.73385	4.9	30.057	1	2	90	4.9959	87	60	0	7.98105
17053	0	32	1	0	17.441	70.5	0	0	0	1878	7	14	43.1	0	11	58	1.49988	159	4.11174	28	0.31612	5.5	36.615	1	1	93	5.16243	85	58	0	7.17166
8608	1	43	0	0	17.4419	65.8	0	0	1	728	11	16	51.6	0	11	60.9	1.57487	219	5.66334	47	0.53063	5.4	35.522	1	3	92	5.10692	118	71	0	7.67879
15204	0	34	0	0	17.4438	65	0	0	0	1909	20	16	48.3	0	12	64.3	1.6628	187	4.83582	32	0.36128	5	31.15	1	1	100	5.551	114.5	66	0	7.37776
2830	0	48	1	0	17.4458	66.2	0	0	0	4365	9	16	47.9	1	7	87.6	2.26534	208	5.37888	58	0.65482	5.1	32.243	1	2	87	4.82937	105.5	71	0	7.8332
9639	1	53	90	0	17.4459	72	0	0	1	1093	9	11	50.3	0	15	31.8	0.822348	171	4.42206	82	0.92578	5.5	36.615	2	3	100	5.551	112.5	72	1	8.31874
15530	1	40	2.8	0	17.4477	66.5	0	0	1	1470	27	23	46.3	0	18	59.6	1.54126	211	5.45646	152	1.71608	5	31.15	1	3	91	5.05141	107.5	67.5	0	8.84159
15682	1	35	90	0	17.4494	71.5	0	0	1	2114	17	25	53.5	0	24	66	1.70676	202	5.22372	50	0.5645	5.4	35.522	2	3	88	4.88488	111.5	71.5	0	7.69621
1206	0	48	126	0	17.4517	60.2	0	0	0	4319	10	14	44.9	0	10	73.9	1.91105	158	4.08588	98	1.10642	4.4	24.592	2	1	89	4.94039	103	62	0	8.38046
9431	0	58	84	0	17.452	62.8	0	0	0	1812	22	18	40.8	1	19	91.2	2.35843	258	6.67188	36	0.40644	5	31.15	2	1	90	4.9959	114	68.5	0	7.39018
19661	0	29	1	0	17.4534	62	0	0	0	881	13	15	47	0	15	71	1.83606	177	4.57722	32	0.36128	5.3	34.429	1	1	91	5.05141	84	55	0	7.28345
6180	1	42	12	0	17.4535	71.6	0	0	1	4410	36	21	50.5	0	28	47.4	1.22576	252	6.51672	106	1.19674	5.6	37.708	1	3	96	5.32896	91.5	61	0	8.53464
13355	0	51	0	0	17.4593	65.5	0	0	0	1609	14	21	43.2	1	12	47.5	1.22835	157	4.06002	41	0.46289	5.4	35.522	1	1	96	5.32896	112.5	75.5	0	7.58477
8836	0	33	84	0	17.4593	58.5	0	0	0	3525	11	14	45.2	0	13	68.1	1.76107	148	3.82728	33	0.37257	4.4	24.592	2	2	85	4.71835	110	68.5	0	7.24601
11224	0	39	0	0	17.4611	65.5	0	0	0	3665	8	18	48	0	12	59.1	1.52833	164	4.24104	55	0.62095	5.656	38.3201	1	1	101	5.60651	102	69.5	0	7.92931
18374	1	65	231	0	17.4619	73	0	0	1	1427	19	38	56.2	1	15	63	1.62918	136	3.51696	43	0.48547	5.4	35.522	3	1	96	5.32896	134.5	87	0	7.6324
2680	1	55	308	0	17.4621	69	0	0	1	917	10	11	48.7	0	22	45.2	1.16887	191	4.93926	67	0.75643	5.5	36.615	4	3	105	5.82855	113.5	71	0	8.16551
14769	0	35	1	0	17.4631	67	0	0	0	2608	21	20	46	0	19	65.9	1.70417	176	4.55136	16	0.18064	5.4	35.522	1	1	83	4.60733	102.5	64.5	0	6.49828
10735	1	35	1	0	17.4633	65	0	0	1	3647	16	14	49.7	0	9	48.1	1.24387	166	4.29276	36	0.40644	4.738	28.2863	1	1	84	4.66284	112.5	69.5	0	7.32119
20508	0	35	2.8	0	17.4648	67	0	0	0	392	13	16	48.3	0	13	52	1.34472	210	5.4306	74	0.83546	5.5	36.615	1	2	86	4.77386	111	71	0	8.06527
13309	0	42	36	0	17.4659	63	0	0	0	2888	9	19	44.1	0	20	61.3	1.58522	160	4.1376	44	0.49676	4.9	30.057	1	1	82	4.55182	87	44.5	0	7.49776
3012	0	35	1	0	17.4681	63	0	0	0	2251	14	14	45.9	0	11	66.1	1.70935	163	4.21518	41	0.46289	4.8	28.964	1	1	78	4.32978	97	65.5	0	7.37713
2211	1	45	0	0	17.4701	68	0	0	1	2208	19	19	54.3	0	24	69.6	1.79986	201	5.19786	77	0.86933	4.8	28.964	1	1	87	4.82937	128.5	75.5	0	8.11657
7776	0	34	1	0	17.4711	60.7	0	0	0	371	12	11	42.3	1	8	65.9	1.70417	167	4.31862	29	0.32741	5	31.15	1	1	89	4.94039	90.5	58.5	0	7.16279
3911	0	36	1	0	17.4732	66	0	0	0	3663	11	13	45.8	0	9	61	1.57746	176	4.55136	25	0.28225	5.044	31.6309	1	1	90	4.9959	98	59	0	7.02554
15234	0	36	1	0	17.4762	66.5	0	0	0	708	24	24	45.3	0	10	44.3	1.1456	135	3.4911	30	0.3387	5.2	33.336	1	1	80	4.4408	97	60	0	7.09008
17288	0	41	0	0	17.4781	59	0	0	0	1771	15	16	44.8	0	10	75	1.9395	170	4.3962	18	0.20322	5	31.15	1	1	77	4.27427	90	61.5	0	6.54103
14731	1	35	1	0	17.4824	66	0	0	1	745	15	22	54.4	0	14	80.4	2.07914	184	4.75824	61	0.68869	5	31.15	1	1	81	4.49631	109	70.5	0	7.81218
17658	0	33	5.13333	0	17.4825	63.5	0	0	0	1016	10	9	41.3	0	10	70	1.8102	164	4.24104	31	0.34999	5	31.15	1	1	81	4.49631	83	54	0	7.13529
10795	0	32	0	0	17.4825	67.5	0	0	0	1832	13	18	41.3	0	8	45.8	1.18439	154	3.98244	31	0.34999	5.452	36.0904	1	1	86	4.77386	95	59	0	7.19519
10375	0	45	0	0	17.4855	62	0	0	0	3694	9	15	46.8	0	11	50.2	1.29817	163	4.21518	49	0.55321	5	31.15	1	1	92	5.10692	114.5	70.5	0	7.72046
15822	0	42	0	0	17.4897	69	0	0	0	2200	20	20	45.9	0	16	59	1.52574	158	4.08588	46	0.51934	5.7	38.801	1	1	96	5.32896	103.5	58.5	0	7.69984
19320	0	38	11.4	0	17.49	71	0	0	0	1162	13	9	42.4	0	11	99	2.56014	199	5.14614	35	0.39515	5.3	34.429	1	1	91	5.05141	101	59	0	7.37306
13035	0	38	1	0	17.4906	65.9	0	0	0	2978	15	19	46.3	0	13	66.2	1.71193	217	5.61162	46	0.51934	4.9	30.057	1	1	86	4.77386	100	63.5	0	7.58984
20886	0	37	0	0	17.4915	58	0	0	0	357	13	13	40.2	0	8	96	2.48256	233	6.02538	34	0.38386	5.4	35.522	1	1	105	5.82855	126	83.5	0	7.48717
14996	0	35	0	0	17.4923	65	0	0	0	1511	18	18	44	0	14	76.4	1.9757	256	6.62016	34	0.38386	5.4	35.522	1	1	80	4.4408	87.5	57.5	0	7.21524
16491	0	36	0	0	17.4966	68	0	0	0	1825	20	25	49.5	0	14	67	1.73262	185	4.7841	43	0.48547	4.9	30.057	1	3	82	4.55182	101.5	65	0	7.47477
9441	0	40	3.86167	0	17.4975	66	0	0	0	4263	13	14	48.1	0	9	72.8	1.88261	202	5.22372	65	0.73385	5.6	37.708	1	1	96	5.32896	91.5	52	0	8.04559
20012	1	40	84	0	17.5	66	0	0	1	669	20	15	56.7	0	23	90	2.3274	186	4.80996	48	0.54192	5.4	35.522	2	2	106	5.88406	108	64.5	0	7.84149
2852	0	52	60	0	17.5048	68.6	0	0	0	4529	13	14	45.6	1	12	63.8	1.64987	190	4.9134	29	0.32741	4.8	28.964	1	1	78	4.32978	101.5	68.5	0	7.03086
11189	1	32	264	0	17.5049	66	0	0	1	3636	34	23	54.1	0	17	56.5	1.46109	218	5.63748	85	0.95965	4.942	30.5161	3	2	100	5.551	91	59.5	0	8.35467
1777	1	42	66	0	17.5066	70	0	0	1	2884	7	15	57.1	0	18	50	1.293	207	5.35302	56	0.63224	4.7	27.871	1	3	101	5.60651	97	59	0	7.94733
13280	0	35	0	0	17.5094	65.2	0	0	0	2869	15	16	43.6	0	12	84.7	2.19034	211	5.45646	17	0.19193	5.2	33.336	1	1	72	3.99672	102.5	63	0	6.41673
17570	0	35	18	0	17.5099	62	0	0	0	1750	16	22	44.1	0	10	64	1.65504	163	4.21518	44	0.49676	5.1	32.243	1	1	80	4.4408	108	65	0	7.47307
13777	0	50	1	0	17.5144	69	0	0	0	2744	19	22	44	0	13	86.7	2.24206	210	5.4306	32	0.36128	5.8	39.894	1	1	84	4.66284	102.5	67.5	0	7.20341
14465	0	35	0	0	17.5153	61.5	0	0	0	2529	13	15	49.2	0	12	73.4	1.89812	159	4.11174	22	0.24838	5.2	33.336	1	1	102	5.66202	88.5	57	0	7.02287
13328	0	36	0	0	17.5172	65	0	0	0	2855	12	20	44.9	0	13	50.4	1.30334	152	3.93072	74	0.83546	5.4	35.522	1	1	86	4.77386	101	59.5	0	8.06527
12811	0	34	1	0	17.5177	61	0	0	0	2556	14	16	40.9	0	9	56.9	1.47143	220	5.6892	88	0.99352	5.4	35.522	1	2	93	5.16243	99	63	0	8.31679
10898	0	39	1	0	17.5197	64	0	0	0	3862	12	15	42.8	0	13	69.8	1.80503	178	4.60308	41	0.46289	5.044	31.6309	1	1	88	4.88488	103.5	60.5	0	7.49776
12560	0	41	0	0	17.5226	60.6	0	0	0	632	16	22	37.3	0	15	55.6	1.43782	171	4.42206	13	0.14677	5.2	33.336	1	1	89	4.94039	89	51.5	0	6.36044
5722	0	42	60	0	17.5234	62.5	0	0	0	4418	11	13	42.1	0	8	74.3	1.9214	203	5.24958	64	0.72256	4.6	26.778	1	1	87	4.82937	104.5	68	0	7.93164
13503	1	41	1	0	17.5264	67.5	0	0	1	2912	10	17	47.6	0	14	62.7	1.62142	186	4.80996	48	0.54192	5.1	32.243	1	1	100	5.551	141	92	0	7.78322
11869	0	44	0	0	17.5313	65.8	0	0	0	3258	10	15	41.2	0	9	60	1.5516	166	4.29276	19	0.21451	5.5	36.615	1	1	89	4.94039	102.5	67	0	6.73993
15458	0	35	0	0	17.5365	62	0	0	0	2080	14	16	44	0	10	62.1	1.60591	201	5.19786	31	0.34999	4.8	28.964	1	2	77	4.27427	91.5	56	0	7.08465
12873	0	49	0	0	17.5365	63.1	0	0	0	2920	7	16	44	0	13	60.2	1.55677	222	5.74092	45	0.50805	5.2	33.336	1	1	99	5.49549	89	60	0	7.70864
17308	0	35	168	0	17.5369	64	0	0	0	404	10	11	51.1	0	11	74	1.91364	168	4.34448	29	0.32741	5	31.15	3	1	92	5.10692	99	66	0	7.19594
5186	0	45	1	0	17.5388	64	0	0	0	4025	9	14	47	0	7	84.3	2.18	169	4.37034	16	0.18064	4.8	28.964	1	1	81	4.49631	90	54.5	0	6.47389
2822	0	34	1	0	17.5406	59.4	0	0	0	3387	10	15	40.9	0	9	56.3	1.45592	170	4.3962	21	0.23709	5.4	35.522	1	1	76	4.21876	102	65	0	6.68211
19659	1	30	1	0	17.5425	72	0	0	1	805	43	24	52.2	0	21	58	1.49988	168	4.34448	47	0.53063	5.2	33.336	1	1	99	5.49549	113.5	63	0	7.75212
17397	1	35	317.8	0	17.5436	70	0	0	1	1773	20	22	56.4	0	15	78	2.01708	186	4.80996	44	0.49676	5.1	32.243	4	1	97	5.38447	126	75.5	0	7.66575
1771	0	42	1	0	17.5443	64.8	0	0	0	3466	5	11	46.1	0	11	50.5	1.30593	160	4.1376	14	0.15806	5.1	32.243	1	1	89	4.94039	91.5	51.5	0	6.43455
19475	0	50	0	0	17.5443	57	0	0	0	767	13	19	41.5	0	13	97	2.50842	241	6.23226	25	0.28225	5.5	36.615	1	1	92	5.10692	126.5	79	0	7.04752
16378	0	40	1	0	17.5477	66.5	0	0	0	1806	9	19	47.6	0	12	93	2.40498	224	5.79264	24	0.27096	5.7	38.801	1	1	93	5.16243	103	67	0	7.01751
7676	0	45	0	0	17.5483	63.7	0	0	0	4235	8	12	45.6	0	9	50.2	1.29817	237	6.12882	85	0.95965	5.5	36.615	1	1	86	4.77386	92.5	58.5	0	8.20385
18638	0	36	1	0	17.5491	65	0	0	0	1242	23	13	48.3	0	14	66	1.70676	164	4.24104	41	0.46289	5.1	32.243	1	1	90	4.9959	90.5	58	0	7.52023
11642	1	52	36	0	17.5503	68.5	0	0	1	266	11	17	51.8	0	10	44.1	1.14043	174	4.49964	126	1.42254	4.84	29.4012	1	2	99	5.49549	95.5	62	0	8.73825
12517	0	46	0	0	17.5509	65.9	0	0	0	3333	7	12	41.3	0	10	86.4	2.2343	225	5.8185	48	0.54192	5.4	35.522	1	1	94	5.21794	102	52	0	7.72135
8984	0	37	0	0	17.5533	66.5	0	0	0	723	14	12	45.5	1	11	62.2	1.60849	194	5.01684	50	0.5645	4.9	30.057	1	2	79	4.38529	107	69.5	0	7.58832
3289	0	36	1	0	17.555	64	0	0	0	3907	10	16	48.2	0	12	52.3	1.35248	173	4.47378	44	0.49676	5.2	33.336	1	1	94	5.21794	100	59.5	0	7.63434
11787	0	43	60	0	17.5566	65.5	0	0	0	2701	11	15	43	0	17	72.3	1.86968	199	5.14614	40	0.4516	5.4	35.522	1	3	90	4.9959	84	52	0	7.49554
12296	1	30	12	0	17.5575	67.5	0	0	1	1820	12	15	51.4	1	13	62.8	1.62401	195	5.0427	68	0.76772	5	31.15	1	1	96	5.32896	115	74.5	0	8.09071
2994	1	69	0	0	17.5582	72.5	0	0	1	365	12	14	48.5	0	15	37.6	0.972336	153	3.95658	62	0.69998	5.4	35.522	1	3	92	5.10692	95	62.5	0	7.95578
19926	0	44	0	0	17.5584	61.5	0	0	0	735	5	6	45.4	0	10	63	1.62918	160	4.1376	30	0.3387	5.1	32.243	1	1	103	5.71753	96	61	0	7.34278
16503	0	47	1	0	17.5592	68.5	0	0	0	1820	16	23	49.5	1	14	65	1.6809	189	4.88754	86	0.97094	5.5	36.615	1	1	95	5.27345	149.5	92.5	0	8.31508
18826	0	50	36	0	17.5606	73	0	0	0	1092	17	17	46.2	0	17	74	1.91364	170	4.3962	32	0.36128	5.4	35.522	1	1	92	5.10692	112.5	70	0	7.29438
5499	0	54	1	0	17.5636	56.2	0	0	0	355	9	18	40.9	0	8	61.3	1.58522	209	5.40474	44	0.49676	5.2	33.336	1	1	82	4.55182	89.5	55	0	7.49776
1218	0	54	0	0	17.5658	66	0	0	0	2752	22	23	44.8	0	12	84.7	2.19034	274	7.08564	58	0.65482	5.5	36.615	1	1	82	4.55182	89.5	63.5	0	7.77402
12463	0	39	90	0	17.5662	60	0	0	0	3265	11	15	46.5	0	8	76	1.96536	155	4.0083	17	0.19193	4.8	28.964	2	1	82	4.55182	107	68	0	6.54679
20115	0	37	180	0	17.5669	71.5	0	0	0	787	13	14	48	1	19	114	2.94804	228	5.89608	42	0.47418	5.1	32.243	3	2	104	5.77304	98.5	66.5	0	7.68891
7427	1	40	245	0	17.5673	68	0	0	1	2563	18	25	49.7	0	23	53.9	1.39385	201	5.19786	144	1.62576	5	31.15	3	3	87	4.82937	112.5	68.5	0	8.74257
20695	0	39	12	0	17.5719	62	0	0	0	356	23	23	43.7	0	7	62	1.60332	137	3.54282	23	0.25967	5.3	34.429	1	1	85	4.71835	81	43	0	6.885
5366	0	30	0	0	17.5725	56.3	0	0	0	1127	7	14	42.6	1	6	56.6	1.46368	180	4.6548	37	0.41773	5.1	32.243	1	1	82	4.55182	97.5	64	0	7.32449
6411	1	42	154	0	17.5763	68	0	0	1	1841	17	16	48.2	0	21	51	1.31886	115	2.9739	30	0.3387	5.1	32.243	3	3	93	5.16243	93.5	63	0	7.24065
19694	0	34	0	0	17.5763	73	0	0	0	728	10	15	44.1	0	8	82	2.12052	218	5.63748	31	0.34999	5.3	34.429	1	1	77	4.27427	89	54.5	0	7.08465
10970	0	39	0	0	17.579	65.3	0	0	0	2128	7	15	43	0	9	48.7	1.25938	180	4.6548	53	0.59837	4.84	29.4012	1	1	94	5.21794	101.5	63.5	0	7.82044
3967	0	52	0	0	17.58	62	0	0	0	1456	15	16	44.5	0	19	111	2.87046	198	5.12028	33	0.37257	5.1	32.243	1	1	83	4.60733	110	68.5	0	7.2222
15505	0	43	1	0	17.5821	65	0	0	0	1390	17	24	48.8	0	11	54.2	1.40161	216	5.58576	53	0.59837	5.5	36.615	1	1	81	4.49631	82	49	0	7.67159
8306	0	52	0	0	17.5831	60.8	0	0	0	4342	17	15	41.7	1	12	49.9	1.29041	172	4.44792	62	0.69998	6	42.08	1	1	104	5.77304	111.5	74	0	8.07838
5349	0	58	0	0	17.5842	60.3	0	0	0	644	10	13	40.2	0	9	86.8	2.24465	227	5.87022	43	0.48547	5.1	32.243	1	1	97	5.38447	112.5	61.5	0	7.64276
6618	1	48	1	0	17.5874	62	0	0	1	730	19	21	46.9	0	10	42.8	1.10681	245	6.3357	89	1.00481	4.7	27.871	1	3	100	5.551	92.5	62	0	8.40066
7346	0	37	18	0	17.5874	68	0	0	0	2155	10	11	46.9	0	13	72.3	1.86968	200	5.172	73	0.82417	4.8	28.964	1	1	92	5.10692	116	73.5	0	8.1191
9786	0	40	1	0	17.5902	62	0	0	0	2014	12	10	45.2	0	10	47.2	1.22059	160	4.1376	23	0.25967	4.8	28.964	1	1	91	5.05141	103	63	0	6.95321
14898	0	46	1	0	17.5907	66	0	0	0	997	15	19	49	0	12	53	1.37058	158	4.08588	27	0.30483	5.2	33.336	1	1	83	4.60733	120	65.5	0	7.02153
20527	1	33	8.4	0	17.5915	69	0	0	1	364	11	10	48.3	0	23	57	1.47402	145	3.7497	34	0.38386	5	31.15	1	3	104	5.77304	110.5	63	0	7.4776
12344	0	40	1	0	17.5932	61.3	0	0	0	3313	8	15	43.2	0	9	52.8	1.36541	151	3.90486	41	0.46289	4.5	25.685	1	1	87	4.82937	101.5	70	0	7.48633
18511	1	61	238	0	17.5973	71	0	0	1	1093	14	14	53.4	0	29	118	3.05148	207	5.35302	77	0.86933	5.2	33.336	3	2	109	6.05059	124.5	77.5	0	8.34201
4236	0	42	60	0	17.5982	63	0	0	0	417	12	15	45.9	0	6	44.8	1.15853	107	2.76702	22	0.24838	4.9	30.057	1	1	86	4.77386	89	56	0	6.85224
10595	0	43	0	0	17.599	64	0	0	0	3964	15	13	42.5	0	16	65.8	1.70159	158	4.08588	41	0.46289	4.84	29.4012	1	1	79	4.38529	109	69	0	7.38987
15327	0	45	54	0	17.6001	65.5	0	0	0	2197	17	22	41.2	0	25	75	1.9395	256	6.62016	34	0.38386	5.4	35.522	1	3	85	4.71835	107	65	0	7.27586
20703	1	39	1	0	17.602	65	0	0	1	389	6	11	54.4	0	20	58	1.49988	232	5.99952	45	0.50805	5.1	32.243	1	1	100	5.551	88	56.5	0	7.71869
3376	0	45	0	0	17.6033	59.5	0	0	0	2571	28	26	41.1	1	15	71.2	1.84123	190	4.9134	65	0.73385	5.2	33.336	1	1	91	5.05141	100	60	0	7.9921
10091	0	36	1	0	17.6033	62.3	0	0	0	4123	17	16	41.1	0	12	56.9	1.47143	170	4.3962	21	0.23709	4.9	30.057	1	1	83	4.60733	110	64	0	6.77022
14407	1	70	0	0	17.6035	71.5	0	0	1	1360	16	22	48.1	0	14	44.7	1.15594	196	5.06856	50	0.5645	5.9	40.987	1	2	78	4.32978	127.5	82	0	7.57558
20454	1	30	90	0	17.6039	70	0	0	1	364	18	14	57.1	0	31	72	1.86192	187	4.83582	50	0.5645	5.1	32.243	2	1	92	5.10692	118	76	0	7.74066
20293	0	48	1	0	17.6056	66	0	0	0	625	20	15	51.3	0	23	89	2.30154	220	5.6892	32	0.36128	5.7	38.801	1	1	92	5.10692	184	94.5	0	7.29438
14837	0	35	1	0	17.6059	63	0	0	0	2552	16	20	41.7	0	15	59.8	1.54643	163	4.21518	76	0.85804	4.7	27.871	1	1	85	4.71835	97.5	60	0	8.08024
14690	0	35	0	0	17.6077	66.5	0	0	0	2176	15	14	47.3	0	17	65.9	1.70417	156	4.03416	47	0.53063	4.4	24.592	1	3	100	5.551	112	68.5	0	7.76217
13447	1	44	1	0	17.6083	65	0	0	1	1779	12	16	52.7	0	16	64.6	1.67056	245	6.3357	58	0.65482	5.4	35.522	1	3	92	5.10692	87.5	55.5	0	7.88908
16432	0	41	0	0	17.6105	73	0	0	0	1923	11	21	42.2	0	10	41	1.06026	138	3.56868	30	0.3387	5.7	38.801	1	1	82	4.55182	108.5	71.5	0	7.11477
18072	1	34	36	0	17.611	67	0	0	1	1363	23	24	54.8	1	10	80	2.0688	198	5.12028	55	0.62095	5.5	36.615	1	1	103	5.71753	117	73	0	7.94891
10622	1	39	0	0	17.6114	66.5	0	0	1	2501	24	22	50.3	0	21	39.4	1.01888	182	4.70652	124	1.39996	5.248	33.8606	1	2	95	5.27345	114.5	74.5	0	8.68101
769	0	50	12	0	17.6138	64.4	0	0	0	1091	20	20	45.6	0	13	85.8	2.21879	219	5.66334	46	0.51934	5.8	39.894	1	1	95	5.27345	96.5	59	0	7.68937
15362	0	37	54	0	17.617	72	0	0	0	2449	15	20	49.9	0	15	71.1	1.83865	163	4.21518	15	0.16935	4.7	27.871	1	2	79	4.38529	88.5	58.5	0	6.38435
14907	0	39	0	0	17.6189	69	0	0	0	2565	14	17	45.5	0	9	62	1.60332	185	4.7841	27	0.30483	5	31.15	1	1	77	4.27427	93	56.5	0	6.9465
1652	1	53	56	0	17.6192	66.3	0	0	1	932	14	12	51.4	0	11	53.9	1.39385	155	4.0083	32	0.36128	4.8	28.964	1	1	100	5.551	98.5	65	0	7.37776
18086	0	32	0	0	17.6216	59	0	0	0	1456	13	8	41.9	0	12	80	2.0688	189	4.88754	34	0.38386	5.1	32.243	1	1	78	4.32978	106	67.5	0	7.18992
13971	1	40	54	0	17.6227	67.5	0	0	1	1006	21	19	53.6	0	12	56.1	1.45075	179	4.62894	66	0.74514	5.5	36.615	1	1	97	5.38447	99	66.5	0	8.07122
13209	0	39	0	0	17.6253	66	0	0	0	1491	6	10	45.8	0	9	63	1.62918	125	3.2325	23	0.25967	5.4	35.522	1	1	89	4.94039	96.5	57.5	0	6.93098
13680	0	39	0	0	17.6256	68	0	0	0	2863	22	18	46.6	0	17	60.4	1.56194	186	4.80996	57	0.64353	4.9	30.057	1	1	79	4.38529	105	61	0	7.71935
13168	0	36	1	0	17.6285	66	0	0	0	1651	13	19	49.4	0	10	52.2	1.34989	190	4.9134	60	0.6774	5	31.15	1	1	89	4.94039	96.5	56	0	7.88983
2504	0	49	0	0	17.6288	58.5	0	0	0	1607	11	12	41.7	0	9	46.9	1.21283	227	5.87022	33	0.37257	4.8	28.964	1	1	83	4.60733	118	75	0	7.2222
5694	0	33	0	0	17.6299	63	0	0	0	3404	13	14	43.9	0	14	70.9	1.83347	225	5.8185	85	0.95965	4.636	27.1715	1	1	83	4.60733	93.5	49.5	0	8.16834
2636	0	51	0	0	17.6305	70	0	0	0	419	17	15	46.9	0	51	120	3.1032	255	6.5943	39	0.44031	5.3	34.429	1	1	83	4.60733	107.5	62	0	7.38926
6084	0	45	1	0	17.6306	58.5	0	0	0	2921	8	10	48.7	0	10	67.3	1.74038	196	5.06856	56	0.63224	4.8	28.964	1	1	88	4.88488	119.5	71	0	7.80954
16539	1	40	84	0	17.6329	69	0	0	1	1841	18	18	51.5	0	16	48	1.24128	150	3.879	31	0.34999	4.7	27.871	2	1	87	4.82937	115.5	77.5	0	7.20675
18506	0	42	1	0	17.6329	58	0	0	0	318	14	12	40.9	0	12	56	1.44816	156	4.03416	59	0.66611	5.5	36.615	1	1	96	5.32896	119	68.5	0	7.94874
8480	0	39	60	0	17.634	67.2	0	0	0	3653	13	17	43.3	0	9	58.4	1.51022	163	4.21518	43	0.48547	4.84	29.4012	1	1	93	5.16243	126.5	67.5	0	7.60065
10344	1	40	0	0	17.6344	72.2	0	0	1	4038	14	15	52.9	0	14	44.3	1.1456	142	3.67212	50	0.5645	4.8	28.964	1	1	100	5.551	109	73	0	7.82405
14808	0	35	0	0	17.6344	67	0	0	0	2530	14	22	43.8	0	12	65.1	1.68349	196	5.06856	43	0.48547	5.4	35.522	1	1	86	4.77386	113	60	0	7.5224
2687	0	41	12	0	17.635	63.5	0	0	0	4458	8	14	49.3	0	8	55.9	1.44557	195	5.0427	53	0.59837	4.6	26.778	1	1	81	4.49631	94	58.5	0	7.67159
11242	0	40	0	0	17.6361	65.5	0	0	0	3792	15	15	46.8	1	11	74	1.91364	161	4.16346	38	0.42902	4.636	27.1715	1	1	86	4.77386	91.5	56	0	7.39879
8352	0	36	0	0	17.6365	60	0	0	0	4576	14	17	46	0	8	79.3	2.0507	174	4.49964	44	0.49676	5.5	36.615	1	1	95	5.27345	102	68.5	0	7.64492
5085	0	35	0	0	17.6368	67.5	0	0	0	1079	14	14	48.6	0	9	56.1	1.45075	183	4.73238	76	0.85804	5.2	33.336	1	1	79	4.38529	107	71.5	0	8.00703
3104	1	54	154	0	17.6401	65.5	0	0	1	3974	12	18	50.8	0	8	59.5	1.53867	166	4.29276	63	0.71127	4.7	27.871	3	2	89	4.94039	121.5	80.5	0	7.93862
16899	0	37	0	0	17.6407	64	0	0	0	1879	14	18	47.1	0	12	73	1.88778	175	4.5255	10	0.1129	5.4	35.522	1	1	89	4.94039	100	53.5	0	6.09807
10781	0	45	1	0	17.6418	63.2	0	0	0	3990	10	14	45.9	1	6	33	0.85338	127	3.28422	68	0.76772	5.758	39.4349	1	1	95	5.27345	106.5	70	0	8.08024
17480	0	39	0	0	17.6471	67	0	0	0	1462	19	22	51	0	12	100	2.586	225	5.8185	16	0.18064	5.4	35.522	1	1	87	4.82937	122.5	78.5	0	6.54535
17676	0	38	0	0	17.6471	67	0	0	0	1485	6	9	45.8	0	16	110	2.8446	200	5.172	28	0.31612	5	31.15	1	1	85	4.71835	142.5	94.5	0	7.08171
15558	1	36	1	0	17.6479	68	0	0	1	1836	42	34	53.8	0	14	78.5	2.03001	205	5.3013	54	0.60966	4.9	30.057	1	2	86	4.77386	98.5	56	0	7.75018
9000	1	35	1	0	17.6518	68.5	0	0	1	4545	16	15	48.7	0	12	56.9	1.47143	153	3.95658	32	0.36128	4.9	30.057	1	1	87	4.82937	94	63.5	0	7.2385
14020	0	51	1	0	17.655	61.5	0	0	0	2916	11	17	42.8	0	12	59.1	1.52833	244	6.30984	84	0.94836	5.6	37.708	1	1	87	4.82937	120	82	0	8.20358
17955	0	35	0	0	17.6562	68	0	0	0	1113	14	12	45.2	0	12	71	1.83606	152	3.93072	33	0.37257	4.9	30.057	1	2	94	5.21794	126	81	0	7.34666
9917	1	44	12	0	17.6566	69	0	0	1	3665	17	19	56.7	0	14	55	1.4223	208	5.37888	43	0.48547	5.044	31.6309	1	1	76	4.21876	111	75	0	7.39879
12436	0	36	1	0	17.6583	64.1	0	0	0	3002	11	16	47.9	0	8	54.7	1.41454	184	4.75824	71	0.80159	5.4	35.522	1	1	90	4.9959	111.5	68	0	8.06934
4851	1	54	154	0	17.66	69.5	0	0	1	4357	11	13	51.7	0	13	62	1.60332	171	4.42206	25	0.28225	4.5	25.685	3	2	92	5.10692	120	79	0	7.04752
4085	1	43	54	0	17.6618	70	0	0	1	4389	9	12	61.3	0	10	53.9	1.39385	180	4.6548	59	0.66611	5.1	32.243	1	3	84	4.66284	104.5	65	0	7.81521
15523	0	35	1	0	17.6625	66	0	0	0	1829	25	21	49.2	1	11	72.6	1.87744	194	5.01684	18	0.20322	4.9	30.057	1	2	81	4.49631	112.5	60	0	6.59167
13940	0	30	0	0	17.6639	67	0	0	0	2639	8	17	44.6	1	10	75.6	1.95502	191	4.93926	34	0.38386	5	31.15	1	2	78	4.32978	82.5	53	0	7.18992
10968	0	36	4.2	0	17.6639	66.3	0	0	0	1088	18	18	46.3	0	21	72.9	1.88519	173	4.47378	39	0.44031	4.942	30.5161	1	1	92	5.10692	107.5	63	0	7.4922
5956	0	45	0	0	17.6642	68	0	0	0	4335	17	15	49.5	0	10	55.9	1.44557	229	5.92194	48	0.54192	4.4	24.592	1	3	83	4.60733	96.5	60	0	7.59689
12341	0	34	18	0	17.6659	62	0	0	0	743	8	12	41.3	0	11	66.5	1.71969	209	5.40474	19	0.21451	5.4	35.522	1	1	91	5.05141	95.5	57	0	6.76215
13893	0	37	12	0	17.6665	63	0	0	0	2807	11	17	47.4	0	14	49.6	1.28266	166	4.29276	41	0.46289	4.9	30.057	1	1	80	4.4408	114	72	0	7.40245
9718	0	35	1	0	17.6666	59	0	0	0	4015	14	15	50.1	0	11	76.1	1.96795	184	4.75824	21	0.23709	5	31.15	1	1	78	4.32978	101.5	56	0	6.70808
15051	0	29	0	0	17.6686	64	0	0	0	2197	18	19	40.5	1	11	59	1.52574	146	3.77556	24	0.27096	4.8	28.964	1	1	87	4.82937	87	52	0	6.95081
12006	0	29	0	0	17.6689	61	0	0	0	3029	14	17	49.1	0	11	63.6	1.6447	158	4.08588	18	0.20322	4.8	28.964	1	1	94	5.21794	119	65.5	0	6.74052
9932	0	38	0	0	17.6691	60.5	0	0	0	938	16	16	46.6	0	16	62.5	1.61625	196	5.06856	35	0.39515	5.248	33.8606	1	1	88	4.88488	112	72.5	0	7.33954
8933	0	32	0	0	17.6703	58.5	0	0	0	4050	9	13	47.7	0	6	59.4	1.53608	170	4.3962	62	0.69998	5.2	33.336	1	1	88	4.88488	92	58.5	0	7.91132
10174	0	28	12.6	0	17.6707	62.4	0	0	0	2987	12	11	49.4	0	8	53.5	1.38351	155	4.0083	48	0.54192	4.5	25.685	1	2	78	4.32978	109.5	62.5	0	7.53476
2340	1	57	308	0	17.6748	70.5	0	0	1	2561	29	35	50.9	0	112	53.7	1.38868	168	4.34448	81	0.91449	5.1	32.243	4	3	99	5.49549	114	72.5	0	8.29642
2685	0	56	0	0	17.6777	58	0	0	0	4169	19	15	42.8	0	7	63.6	1.6447	218	5.63748	97	1.09513	5.4	35.522	1	1	95	5.27345	109.5	64.5	0	8.43544
9105	0	21	0	0	17.6784	63.5	0	0	0	1078	16	14	41.6	0	13	52.6	1.36024	176	4.55136	48	0.54192	4.9	30.057	1	1	80	4.4408	93	58.5	0	7.56008
2148	1	47	110	1	17.6789	70.2	0	0	5	4399	22	15	54.7	0	59	84.3	2.18	239	6.18054	93	1.04997	5.2	33.336	2	2	104	5.77304	123	75	0	8.48384
12442	0	32	1	0	17.6794	60	0	0	0	1453	9	14	48.6	0	10	48.2	1.24645	105	2.7153	10	0.1129	4.8	28.964	1	1	85	4.71835	98.5	59.5	0	6.05209
1779	0	36	60	0	17.6803	64.9	0	0	0	1439	21	20	46	0	19	60.7	1.5697	167	4.31862	30	0.3387	4.8	28.964	1	1	80	4.4408	87.5	54.5	0	7.09008
15954	1	68	62	0	17.6837	71	0	0	1	2154	27	29	49.2	0	39	53	1.37058	194	5.01684	106	1.19674	5.1	32.243	1	2	94	5.21794	109	66.5	0	8.51359
16293	0	42	2.8	0	17.684	71	0	0	0	1077	13	19	47.1	0	16	73	1.88778	197	5.09442	60	0.6774	5.4	35.522	1	1	97	5.38447	108	61.5	0	7.97591
20821	1	38	270	1	17.6857	66	0	0	5	392	34	60	48.5	0	56	135	3.4911	209	5.40474	41	0.46289	5.1	32.243	3	3	94	5.21794	118.5	77	0	7.56372
7202	0	36	0	0	17.6858	61.2	0	0	0	4638	14	16	47.8	0	10	77.7	2.00932	162	4.18932	48	0.54192	4.7	27.871	1	1	91	5.05141	95	65	0	7.68891
20719	0	39	1	0	17.6866	60	0	0	0	369	8	18	42	0	10	67	1.73262	191	4.93926	62	0.69998	5.3	34.429	1	1	94	5.21794	126.5	78	0	7.97728
7571	0	30	0	0	17.6878	59.5	0	0	0	4607	16	12	44.1	0	14	69.8	1.80503	159	4.11174	29	0.32741	4.6	26.778	1	1	83	4.60733	112	70	0	7.09299
19578	0	35	0	0	17.6883	68	0	0	0	728	13	15	50.4	1	10	71	1.83606	176	4.55136	17	0.19193	5.2	33.336	1	1	73	4.05223	115.5	68	0	6.43053
4944	1	41	154	0	17.69	66.4	0	0	1	2246	17	12	52.7	0	29	93.7	2.42308	204	5.27544	35	0.39515	4.8	28.964	3	3	93	5.16243	101	66.5	0	7.3948
18693	0	35	1	0	17.6925	59	0	0	0	1184	9	11	44	0	15	86	2.22396	153	3.95658	69	0.77901	5	31.15	1	2	85	4.71835	104	60.5	0	7.98361
13775	0	39	0	0	17.6939	63	0	0	0	2800	10	13	42.4	0	11	55.8	1.44299	165	4.2669	30	0.3387	5	31.15	1	1	93	5.16243	96.5	64	0	7.24065
13426	0	35	0	0	17.6953	62	0	0	0	1810	14	15	45.3	0	15	58	1.49988	156	4.03416	28	0.31612	4.9	30.057	1	1	79	4.38529	103.5	68	0	7.00851
12088	0	44	1	0	17.6968	65	0	0	0	3227	11	15	46.1	0	10	62.7	1.62142	173	4.47378	21	0.23709	5.2	33.336	1	1	97	5.38447	114.5	68	0	6.92609
18683	0	34	1	0	17.7007	65	0	0	0	846	19	13	44.3	0	11	80	2.0688	167	4.31862	22	0.24838	5.3	34.429	1	2	86	4.77386	80.5	50.5	0	6.85224
18591	0	35	45.3	0	17.7022	64	0	0	0	999	16	13	46	0	12	86	2.22396	205	5.3013	33	0.37257	5.2	33.336	1	2	83	4.60733	93	54	0	7.2222
12986	0	52	0	0	17.7035	64.3	0	0	0	3284	19	31	44.7	1	14	69	1.78434	208	5.37888	29	0.32741	5.5	36.615	1	1	103	5.71753	118	74	0	7.30888
2803	0	52	0	0	17.7055	61	0	0	0	1099	31	29	44.2	1	14	97.5	2.52135	236	6.10296	36	0.40644	5.2	33.336	1	1	81	4.49631	110.5	72.5	0	7.28482
7418	0	55	1	0	17.707	65.2	0	0	0	4108	13	12	45.5	0	7	87.4	2.26016	188	4.86168	29	0.32741	4.6	26.778	1	1	83	4.60733	110	65	0	7.09299
15961	0	37	0	0	17.707	61	0	0	0	1639	14	21	46.7	0	11	62	1.60332	173	4.47378	25	0.28225	5.4	35.522	1	1	88	4.88488	102.5	58	0	7.00307
7254	0	40	0	0	17.7073	65.8	0	0	0	4384	9	13	47.8	0	6	61.2	1.58263	177	4.57722	35	0.39515	5	31.15	1	1	74	4.10774	102	64.5	0	7.16627
16397	0	42	1	0	17.7102	62.5	0	0	0	2198	16	23	44.1	0	11	68	1.75848	158	4.08588	34	0.38386	5	31.15	1	2	86	4.77386	91.5	45.5	0	7.28756
5989	0	59	0	0	17.7131	69.5	0	0	0	2396	14	18	45.8	1	9	68.7	1.77658	198	5.12028	39	0.44031	5.1	32.243	1	1	81	4.49631	100.5	68	0	7.36486
9974	0	28	0	0	17.7132	68.8	0	0	0	2982	17	25	46.2	0	7	52.3	1.35248	153	3.95658	24	0.27096	4.6	26.778	1	1	86	4.77386	97.5	55.5	0	6.93925
7938	0	49	0	0	17.7157	64	0	0	0	3971	17	15	41.2	0	10	60.4	1.56194	170	4.3962	54	0.60966	5.4	35.522	1	1	98	5.43998	100.5	72.5	0	7.8808
20766	0	42	0	0	17.7175	62	0	0	0	380	11	7	45.3	0	18	75	1.9395	188	4.86168	40	0.4516	4.8	28.964	1	1	86	4.77386	109.5	66.5	0	7.45008
8762	0	42	0	0	17.7226	68	0	0	0	1888	10	18	45.2	0	13	57	1.47402	209	5.40474	28	0.31612	5.1	32.243	1	1	88	4.88488	125	77	0	7.11639
8647	1	51	1	0	17.7229	65	0	0	1	360	16	13	51.4	0	21	59.5	1.53867	199	5.14614	99	1.11771	4.9	30.057	1	3	95	5.27345	102	63	0	8.45585
16813	0	41	0	0	17.7233	65.5	0	0	0	1854	12	22	51.1	0	9	72	1.86192	177	4.57722	41	0.46289	5.2	33.336	1	1	83	4.60733	108	71	0	7.43927
366	1	46	248.5	0	17.7243	63.3	0	0	1	3865	17	20	48.9	0	13	89.3	2.3093	211	5.45646	26	0.29354	5.1	32.243	3	3	97	5.38447	116.5	73	0	7.13966
18239	0	31	162	0	17.7262	67	0	0	0	420	9	9	49.2	0	49	85	2.1981	162	4.18932	64	0.72256	4.9	30.057	3	3	91	5.05141	104	67	0	7.9766
18057	0	25	0	0	17.7274	68	0	0	0	1485	15	16	47.1	0	19	100	2.586	214	5.53404	33	0.37257	5.2	33.336	1	1	87	4.82937	90.5	53	0	7.26927
5004	0	67	0	0	17.7291	73	0	0	0	2828	15	27	45.5	0	12	53.5	1.38351	236	6.10296	42	0.47418	5.2	33.336	1	1	82	4.55182	98.5	58.5	0	7.45124
17128	0	40	1	0	17.7306	67	0	0	0	1672	17	18	39.1	0	13	89	2.30154	189	4.88754	26	0.29354	4.8	28.964	1	1	79	4.38529	104.5	69.5	0	6.9344
16134	0	39	0	0	17.7318	71	0	0	0	2224	14	19	41.4	0	11	69	1.78434	187	4.83582	33	0.37257	5.2	33.336	1	1	85	4.71835	101	60	0	7.24601
410	0	57	0	0	17.7329	57	0	0	0	421	20	18	45	0	10	79.1	2.04553	259	6.69774	42	0.47418	5	31.15	1	1	89	4.94039	113.5	76.5	0	7.53316
6195	0	45	0	0	17.7344	74.5	0	0	0	1455	19	23	45.4	0	17	75	1.9395	163	4.21518	69	0.77901	5.1	32.243	1	1	96	5.32896	112	73.5	0	8.10531
19295	1	30	1	0	17.7351	68	0	0	1	734	14	18	54.5	0	11	70	1.8102	223	5.76678	56	0.63224	5.4	35.522	1	1	90	4.9959	105	59.5	0	7.83201
13787	1	61	0	0	17.7375	68	0	0	1	1021	10	24	43	0	44	86.7	2.24206	215	5.5599	31	0.34999	5.2	33.336	1	2	96	5.32896	103	66.5	0	7.30519
20651	0	57	12	0	17.7375	65	0	0	0	390	11	16	43	0	15	70	1.8102	211	5.45646	60	0.6774	5.5	36.615	1	1	96	5.32896	135.5	78.5	0	7.96555
3718	0	39	0	0	17.7375	53.8	0	0	0	2184	8	14	44	1	9	94.8	2.45153	243	6.28398	41	0.46289	5.1	32.243	1	1	79	4.38529	97	61	0	7.38987
2297	0	40	0	0	17.738	54.6	0	0	0	4390	9	12	43.5	0	8	91.8	2.37395	201	5.19786	29	0.32741	5.7	38.801	1	1	85	4.71835	84.5	50.5	0	7.1168
9110	0	20	1	0	17.7381	63.3	0	0	0	1435	9	15	44.9	0	6	54.1	1.39903	133	3.43938	35	0.39515	4.4	24.592	1	1	78	4.32978	114	80	0	7.21891
9506	1	35	0	0	17.7389	70	0	0	1	3652	16	11	55.7	0	12	32.2	0.832692	151	3.90486	59	0.66611	4.5	25.685	1	3	86	4.77386	100	59	0	7.83874
19209	0	41	4.2	0	17.7399	63	0	0	0	659	11	11	38.7	0	9	81	2.09466	199	5.14614	34	0.38386	5.1	32.243	1	1	86	4.77386	99	59.5	0	7.28756
10283	0	44	1	0	17.7402	61	0	0	0	4051	12	19	41.8	0	10	59.4	1.53608	220	5.6892	66	0.74514	5	31.15	1	1	88	4.88488	93.5	57.5	0	7.97384
6482	0	45	84	0	17.741	60.8	0	0	0	4416	23	18	48.3	1	8	71.5	1.84899	236	6.10296	38	0.42902	5	31.15	2	1	86	4.77386	84	54	0	7.39879
13928	1	32	1	0	17.7417	63	0	0	1	2876	12	14	52	0	11	67.5	1.74555	174	4.49964	36	0.40644	5.2	33.336	1	1	96	5.32896	96.5	67.5	0	7.45472
13555	0	42	0	0	17.7431	68	0	0	0	3010	11	19	44.8	0	12	73.7	1.90588	179	4.62894	49	0.55321	4.9	30.057	1	1	74	4.10774	105	55.5	0	7.50274
18126	0	34	0	0	17.7433	66	0	0	0	1106	13	10	47.2	0	19	68	1.75848	170	4.3962	39	0.44031	5.2	33.336	1	1	88	4.88488	98.5	59	0	7.44775
2495	0	38	1	0	17.7444	64.5	0	0	0	4016	9	17	47.9	1	12	66.4	1.7171	153	3.95658	11	0.12419	4.6	26.778	1	1	88	4.88488	128.5	79	0	6.18208
12695	0	41	12	0	17.7457	64.8	0	0	0	405	20	23	48.9	1	14	83	2.14638	218	5.63748	45	0.50805	4.9	30.057	1	1	82	4.55182	96	60.5	0	7.52023
10885	0	31	0	0	17.7469	61.1	0	0	0	375	11	15	43.8	0	9	61.6	1.59298	195	5.0427	40	0.4516	5.35	34.9755	1	3	96	5.32896	94	60.5	0	7.56008
3937	0	50	66	0	17.7471	65.2	0	0	0	4011	12	19	47.5	0	15	66.1	1.70935	190	4.9134	69	0.77901	4.7	27.871	1	3	70	3.8857	95	59	0	7.78945
13007	0	33	1	0	17.7482	63	0	0	0	1756	5	12	44.7	0	9	57.7	1.49212	123	3.18078	58	0.65482	5	31.15	1	1	86	4.77386	110	63.5	0	7.82164
1610	1	49	126	0	17.7496	71.5	0	0	1	3978	15	17	53	0	14	49	1.26714	215	5.5599	100	1.129	5.1	32.243	2	3	90	4.9959	129	74	0	8.41183
11905	0	40	0	0	17.7513	63.9	0	0	0	3552	7	11	51	0	8	60.8	1.57229	200	5.172	39	0.44031	5.6	37.708	1	1	81	4.49631	94	60.5	0	7.36486
11427	0	43	1	0	17.7515	67.5	0	0	0	2640	13	30	46.3	0	10	57.8	1.49471	157	4.06002	72	0.81288	5.35	34.9755	1	1	93	5.16243	107	63.5	1	8.11612
20449	1	34	4.2	0	17.7516	70	0	0	1	364	13	12	54.8	0	10	60	1.5516	169	4.37034	61	0.68869	5.3	34.429	1	1	101	5.60651	118.5	76.5	0	8.03285
19114	0	42	0	0	17.7517	69.5	0	0	0	1098	8	12	45.9	0	16	75	1.9395	198	5.12028	81	0.91449	5.2	33.336	1	1	83	4.60733	123	71	0	8.12014
15608	0	44	1	0	17.754	71.5	0	0	0	704	23	25	49.1	0	12	90.6	2.34292	216	5.58576	40	0.4516	5.2	33.336	1	1	82	4.55182	107.5	75.5	0	7.40245
2558	0	43	2.8	0	17.7559	62	0	0	0	3288	13	18	40.7	0	18	57.2	1.47919	157	4.06002	18	0.20322	5.5	36.615	1	3	93	5.16243	95	65.5	0	6.72982
19644	1	70	17.5	0	17.7586	69	0	0	1	685	50	54	48.7	1	17	95	2.4567	200	5.172	50	0.5645	5.9	40.987	1	2	89	4.94039	133	66.5	0	7.70751
13295	0	56	0	0	17.7603	64	0	0	0	1084	15	24	43	0	15	62.8	1.62401	240	6.2064	71	0.80159	5.6	37.708	1	1	94	5.21794	108.5	70.5	0	8.11283
8499	0	42	0	0	17.7607	58.6	0	0	0	4400	19	18	43.5	0	10	84.5	2.18517	186	4.80996	62	0.69998	4.4	24.592	1	1	89	4.94039	92.5	57	0	7.92262
5867	0	30	0	0	17.761	62.7	0	0	0	4396	19	14	52.3	0	14	77.5	2.00415	183	4.73238	33	0.37257	5.1	32.243	1	1	95	5.27345	84.5	51.5	0	7.35724
4747	0	43	0	0	17.7622	61.2	0	0	0	3660	17	14	46.5	0	12	73.9	1.91105	239	6.18054	54	0.60966	5	31.15	1	3	106	5.88406	93	57.5	0	7.95928
19144	1	33	84	0	17.7625	68	0	0	1	726	14	11	55.9	0	18	85	2.1981	196	5.06856	98	1.10642	5	31.15	2	2	98	5.43998	110.5	72.5	0	8.47679
16832	1	43	90	0	17.7626	60	0	0	1	1477	13	23	48.3	1	18	125	3.2325	243	6.28398	35	0.39515	5	31.15	2	1	85	4.71835	116	76	0	7.30485
13999	0	35	36	0	17.7708	72	0	0	0	2176	13	15	42.2	0	14	56.7	1.46626	180	4.6548	33	0.37257	5.1	32.243	1	2	83	4.60733	109	64.5	0	7.2222
14010	0	35	1	0	17.771	63	0	0	0	1793	12	16	47.1	1	13	60.7	1.5697	161	4.16346	21	0.23709	4.7	27.871	1	1	84	4.66284	93	63.5	0	6.78219
4362	1	43	0	0	17.7722	62.3	0	0	1	4678	15	14	47.8	0	11	53.8	1.39127	207	5.35302	71	0.80159	5.1	32.243	1	1	81	4.49631	122	74	0	7.96398
10111	0	28	0	0	17.7722	69.5	0	0	0	1148	15	18	47.8	0	8	66.8	1.72745	164	4.24104	51	0.57579	5.2	33.336	1	1	88	4.88488	102	64.5	0	7.71602
8283	0	31	1	0	17.7726	63.8	0	0	0	4206	20	13	46.7	0	10	52.3	1.35248	143	3.69798	32	0.36128	5.1	32.243	1	1	94	5.21794	101.5	68	0	7.31588
17910	0	33	1	0	17.7726	68	0	0	0	761	6	8	46.7	0	11	45	1.1637	142	3.67212	42	0.47418	5.2	33.336	1	1	85	4.71835	114.5	59.5	0	7.48717
17488	0	35	1	0	17.7729	63	0	0	0	1302	21	21	44.2	0	18	60	1.5516	180	4.6548	62	0.69998	5.1	32.243	1	1	84	4.66284	108	64	0	7.8648
18066	0	39	0	0	17.7747	63	0	0	0	1533	13	14	41.5	0	11	94	2.43084	225	5.8185	34	0.38386	5.5	36.615	1	1	88	4.88488	95.5	57	0	7.31055
1224	0	46	1	0	17.7748	64	0	0	0	3277	16	20	42.1	0	15	64.2	1.66021	161	4.16346	34	0.38386	5.1	32.243	1	1	88	4.88488	103	63	0	7.31055
15188	1	37	0	0	17.7756	68	0	0	1	2568	22	18	54.5	0	24	53.7	1.38868	197	5.09442	52	0.58708	5	31.15	1	1	96	5.32896	104	60.5	0	7.82244
12490	1	31	60	0	17.7769	63.8	0	0	1	873	17	16	49.4	0	13	46.8	1.21025	138	3.56868	17	0.19193	4.9	30.057	1	1	78	4.32978	122	72	0	6.49677
3244	1	59	1	0	17.7769	68	0	0	1	4351	13	19	49.4	0	8	43.5	1.12491	187	4.83582	115	1.29835	5.5	36.615	1	2	89	4.94039	110.5	74.5	0	8.54042
3438	0	64	0	0	17.7827	62.5	0	0	0	3086	10	20	40.6	0	11	69.5	1.79727	196	5.06856	28	0.31612	5.4	35.522	1	1	92	5.10692	94.5	65	0	7.16085
985	0	46	0	0	17.7831	62.6	0	0	0	4321	10	14	43	0	7	74	1.91364	169	4.37034	76	0.85804	4.8	28.964	1	1	82	4.55182	84.5	53.5	0	8.04431
17118	0	33	1	0	17.7856	60	0	0	0	1457	14	17	41.2	0	12	63	1.62918	240	6.2064	63	0.71127	5.2	33.336	1	2	80	4.4408	101	59.5	0	7.83201
1376	0	53	2.8	0	17.7857	61	0	0	0	1916	10	16	38.8	0	13	56.5	1.46109	163	4.21518	36	0.40644	5.2	33.336	1	1	84	4.66284	104.5	69.5	0	7.32119
15588	1	35	1	0	17.7902	68.5	0	0	1	2192	22	22	49.2	0	16	60.4	1.56194	207	5.35302	48	0.54192	5.2	33.336	1	1	93	5.16243	97	64.5	0	7.71065
9525	0	41	18	0	17.7903	63.6	0	0	0	4018	20	16	45.6	1	15	89.8	2.32223	196	5.06856	40	0.4516	5.1	32.243	1	1	87	4.82937	92.5	55	0	7.46164
8390	0	31	0	0	17.7904	60.5	0	0	0	2750	9	15	41.7	0	6	50.3	1.30076	163	4.21518	28	0.31612	5.4	35.522	1	1	86	4.77386	91.5	59	0	7.0934
7685	1	42	252	0	17.793	64.8	0	0	1	3619	16	13	52.7	0	23	57.1	1.47661	165	4.2669	71	0.80159	5.044	31.6309	3	3	98	5.43998	120	83.5	0	8.1545
8795	1	35	0	0	17.7934	66.6	0	0	1	4370	17	17	58.1	0	18	56.5	1.46109	175	4.5255	47	0.53063	4.9	30.057	1	1	98	5.43998	105	70	0	7.74197
25	0	50	0	0	17.7979	62	0	0	0	4442	23	25	42.1	0	24	76.7	1.98346	239	6.18054	115	1.29835	4.7	27.871	1	1	78	4.32978	95.5	64	0	8.40849
9625	1	37	2.8	0	17.7984	68.5	0	0	1	1482	15	9	52.9	0	14	67.6	1.74814	145	3.7497	22	0.24838	4.4	24.592	1	1	89	4.94039	117	72.5	0	6.88653
19131	0	52	60	0	17.8011	62	0	0	0	1081	8	8	45.4	0	9	88	2.27568	201	5.19786	43	0.48547	5.7	38.801	1	3	86	4.77386	101	58.5	0	7.5224
10619	1	59	22	0	17.8013	66.5	0	0	1	3373	15	17	46.2	0	9	65.6	1.69642	211	5.45646	61	0.68869	5.146	32.7458	1	3	83	4.60733	98	64.5	0	7.83657
15815	0	38	0	0	17.8013	67	0	0	0	1477	8	10	46.2	0	8	81	2.09466	171	4.42206	17	0.19193	5.2	33.336	1	1	90	4.9959	92.5	58	0	6.63988
19748	0	35	0	0	17.8031	61.5	0	0	0	736	10	10	44.5	0	15	65	1.6809	145	3.7497	31	0.34999	5.5	36.615	1	1	92	5.10692	92.5	47.5	0	7.26263
6283	0	37	12	0	17.8046	56.2	0	0	0	1101	21	15	42.5	0	11	55.8	1.44299	167	4.31862	42	0.47418	5	31.15	1	1	85	4.71835	91.5	57	0	7.48717
5833	0	60	0	0	17.809	67.8	0	0	0	860	16	23	41.2	0	13	60.6	1.56712	237	6.12882	56	0.63224	5.4	35.522	1	1	85	4.71835	92.5	59	0	7.77486
11324	1	53	1	0	17.8119	68.2	0	0	1	1456	17	21	46.4	0	20	50.6	1.30852	215	5.5599	95	1.07255	6	42.08	1	2	109	6.05059	126	83.5	0	8.55208
18303	0	44	0	0	17.8125	60	0	0	0	1361	14	11	45.6	0	16	64	1.65504	230	5.9478	35	0.39515	5.6	37.708	1	1	88	4.88488	99.5	62.5	0	7.33954
17470	0	35	18	0	17.8126	62	0	0	0	1381	10	11	41.1	1	13	93	2.40498	212	5.48232	82	0.92578	5.2	33.336	1	1	92	5.10692	125	85.5	0	8.23536
13593	1	50	126	0	17.8127	64	0	0	1	2924	16	18	51.6	0	12	53.6	1.3861	198	5.12028	59	0.66611	5.6	37.708	2	2	102	5.66202	105.5	71	0	8.00936
20908	0	22	1	0	17.8148	62	0	0	0	399	5	7	43.8	1	8	66	1.70676	139	3.59454	29	0.32741	5.1	32.243	1	1	94	5.21794	108	71	0	7.21744
20273	0	35	0	0	17.8148	62	0	0	0	369	19	12	43.8	0	25	78	2.01708	153	3.95658	17	0.19193	5.2	33.336	1	1	79	4.38529	99	56.5	0	6.50951
4284	1	54	1	0	17.8149	72	0	0	1	1883	13	22	57.4	0	16	43.2	1.11715	177	4.57722	73	0.82417	4.9	30.057	1	3	93	5.16243	105.5	70.5	0	8.12991
12331	1	37	154	0	17.8163	70.8	0	0	1	3290	16	18	54.5	0	36	59.5	1.53867	163	4.21518	40	0.4516	4.8	28.964	3	3	95	5.27345	99	60	0	7.54961
11723	0	36	0	0	17.817	64.3	0	0	0	3581	11	15	42.2	0	10	46.7	1.20766	166	4.29276	39	0.44031	5.4	35.522	1	1	91	5.05141	85	55.5	0	7.48127
9427	0	39	0	0	17.818	64.8	0	0	0	3476	14	10	45.5	0	9	49.5	1.28007	177	4.57722	52	0.58708	4.7	27.871	1	3	87	4.82937	100	65.5	0	7.724
1963	1	60	126	0	17.821	65.5	0	0	1	2176	14	16	48.4	0	14	49.3	1.2749	172	4.44792	84	0.94836	5.1	32.243	2	3	94	5.21794	105	64	0	8.28096
9229	0	44	11	0	17.8213	59.5	0	0	0	727	17	17	41.5	0	12	70.4	1.82054	202	5.22372	22	0.24838	5	31.15	1	1	72	3.99672	102.5	62.5	0	6.67456
15760	0	40	1	0	17.8223	68	0	0	0	1765	16	17	45	0	17	81.8	2.11535	201	5.19786	62	0.69998	5	31.15	1	1	90	4.9959	102	62.5	0	7.9338
20570	1	33	252	0	17.8238	69	0	0	1	355	18	24	56.6	0	19	80	2.0688	195	5.0427	83	0.93707	5	31.15	3	2	89	4.94039	123	71.5	0	8.21433
7344	0	41	0	0	17.8243	57.6	0	0	0	722	23	16	43.6	0	10	78.6	2.0326	204	5.27544	57	0.64353	4.9	30.057	1	1	91	5.05141	104	64	0	7.86076
16981	0	35	0	0	17.8246	72	0	0	0	203	11	18	47.3	0	11	72	1.86192	163	4.21518	25	0.28225	4.9	30.057	1	1	77	4.27427	90	52.5	0	6.86953
11293	1	59	84	0	17.8263	67	0	0	1	721	14	19	51.7	0	11		0	186	4.80996	115	1.29835	5.452	36.0904	2	1	96	5.32896	133	83	0	8.61613
19685	1	30	1	0	17.8265	66	0	0	1	728	14	10	39.1	0	9	60	1.5516	158	4.08588	86	0.97094	5	31.15	1	2	84	4.66284	94.5	55.5	0	8.19202
18299	0	37	0	0	17.828	68	0	0	0	1259	11	12	47.6	0	10	54	1.39644	168	4.34448	77	0.86933	5	31.15	1	1	79	4.38529	100	70.5	0	8.02011
20106	1	65	0	0	17.8282	69.5	0	0	1	364	31	29	49.9	0	22	56	1.44816	192	4.96512	93	1.04997	5.6	37.708	1	2	98	5.43998	136.5	77.5	0	8.42442
15259	0	30	1	0	17.8282	67	0	0	0	2567	16	19	49.9	0	12	56.2	1.45333	146	3.77556	35	0.39515	4.9	30.057	1	1	89	4.94039	101.5	68.5	0	7.35084
15387	1	35	0	0	17.8285	67	0	0	1	2565	16	18	55.1	0	13	55.6	1.43782	183	4.73238	51	0.57579	5.2	33.336	1	1	93	5.16243	116	75.5	0	7.77128
6672	0	25	2.8	0	17.8289	60.4	0	0	0	368	14	16	43	0	11	54.8	1.41713	200	5.172	95	1.07255	5.4	35.522	1	1	85	4.71835	81.5	48.5	0	8.30338
15208	0	43	12	0	17.8306	68.5	0	0	0	2182	17	21	47.2	0	12	63.8	1.64987	205	5.3013	51	0.57579	5.2	33.336	1	1	87	4.82937	106.5	57.5	0	7.70459
1648	1	52	0	0	17.8327	74	0	0	1	4311	20	22	54.8	1	17	39.5	1.02147	203	5.24958	108	1.21932	5.5	36.615	1	1	89	4.94039	97	61.5	0	8.47762
2318	0	40	22	0	17.8363	58.6	0	0	0	2225	22	22	38.7	0	25	67.8	1.75331	198	5.12028	30	0.3387	4.8	28.964	1	1	80	4.4408	89.5	58	0	7.09008
9779	0	35	0	0	17.8378	62.8	0	0	0	4042	9	12	42.8	0	10	61.9	1.60073	190	4.9134	26	0.29354	4.6	26.778	1	1	94	5.21794	123	81	0	7.10824
7170	0	44	0	0	17.8386	56.8	0	0	0	4450	36	65	38.6	1	8	90	2.3274	225	5.8185	41	0.46289	5	31.15	1	1	84	4.66284	85	57.5	0	7.45124
10788	0	29	18	0	17.8398	62	0	0	0	3642	10	16	46.3	0	8	65.3	1.68866	167	4.31862	38	0.42902	4.84	29.4012	1	1	95	5.27345	98.5	61.5	0	7.49832
16370	0	39	1	0	17.8403	63	0	0	0	373	12	20	47.4	1	16	63	1.62918	177	4.57722	50	0.5645	5	31.15	1	1	96	5.32896	103	62	0	7.78322
12381	0	40	18	0	17.8422	64.8	0	0	0	3287	13	15	42.7	0	14	64.3	1.6628	190	4.9134	27	0.30483	4.6	26.778	1	1	80	4.4408	116.5	70	0	6.98472
6235	0	48	126	0	17.8424	63.5	0	0	0	1434	14	13	43.7	0	15	59.1	1.52833	163	4.21518	70	0.7903	5.1	32.243	2	3	83	4.60733	96.5	62	0	7.97419
17445	0	59	31.85	0	17.8426	61	0	0	0	1363	17	29	39.4	0	10	86	2.22396	202	5.22372	54	0.60966	5.6	37.708	1	2	103	5.71753	114	73.5	0	7.93057
19669	1	30	1	0	17.8447	67	0	0	1	784	14	10	48.7	0	16	58	1.49988	213	5.50818	75	0.84675	5.4	35.522	1	1	99	5.49549	121	67.5	0	8.21946
580	0	48	60	0	17.8465	68.5	0	0	0	4123	8	12	42.6	1	15	79.7	2.06104	202	5.22372	140	1.5806	4.8	28.964	1	1	89	4.94039	124.5	78	0	8.73713
9940	0	43	0	0	17.8474	65.5	0	0	0	539	10	8	43.1	0	9	66.6	1.72228	156	4.03416	18	0.20322	4.6	26.778	1	1	79	4.38529	90	57.5	0	6.56667
4835	1	43	154	0	17.8478	68	0	0	1	4174	20	18	55.6	1	15	45.3	1.17146	150	3.879	39	0.44031	4.9	30.057	3	3	80	4.4408	97.5	61.5	0	7.35244
10401	1	50	1	0	17.8484	67.5	0	0	1	3219	18	21	54.1	0	14	54.3	1.4042	139	3.59454	38	0.42902	5	31.15	1	2	105	5.82855	106.5	56	0	7.5984
8291	0	32	0	0	17.8501	58.5	0	0	0	2134	19	15	40.7	0	14	81.8	2.11535	212	5.48232	80	0.9032	4.7	27.871	1	1	79	4.38529	90.5	56.5	0	8.05833
10465	0	34	12	0	17.8506	67.2	0	0	0	3647	18	17	44	0	6	61.7	1.59556	204	5.27544	31	0.34999	4.7	27.871	1	1	83	4.60733	104	67	0	7.15968
8797	1	35	1	0	17.8529	62.8	0	0	1	4343	13	13	47.9	0	10	48	1.24128	195	5.0427	95	1.07255	4.8	28.964	1	1	96	5.32896	106	68	0	8.42508
6270	0	35	36	0	17.8529	65	0	0	0	1373	16	13	47.9	0	18	80	2.0688	160	4.1376	39	0.44031	5.2	33.336	1	3	80	4.4408	95	52.5	0	7.35244
19572	0	35	51.87	0	17.8533	71	0	0	0	1022	8	8	44.4	0	8	106	2.74116	214	5.53404	31	0.34999	4.8	28.964	1	2	83	4.60733	119.5	70.5	0	7.15968
5367	0	27	0	0	17.8608	61.5	0	0	0	1471	21	20	42.8	0	9	63.8	1.64987	171	4.42206	39	0.44031	4.7	27.871	1	1	79	4.38529	101.5	60.5	0	7.33986
17276	0	63	0	0	17.861	65	0	0	0	1470	24	28	39.6	0	16	56	1.44816	219	5.66334	53	0.59837	5.1	32.243	1	1	81	4.49631	119	74	0	7.67159
8700	0	41	1	0	17.8612	57	0	0	0	2131	12	16	43.3	1	11	94.7	2.44894	227	5.87022	50	0.5645	5.5	36.615	1	1	92	5.10692	104	71.5	0	7.74066
12673	0	54	0	0	17.8619	67.3	0	0	0	1851	14	24	45.1	0	9	60.7	1.5697	187	4.83582	73	0.82417	5.5	36.615	1	1	87	4.82937	90.5	61.5	0	8.06322
13563	0	37	0	0	17.862	62.5	0	0	0	3195	17	19	46.3	0	15	77.5	2.00415	196	5.06856	47	0.53063	5.4	35.522	1	1	90	4.9959	113.5	71	0	7.65681
13676	1	39	60	0	17.8629	71	0	0	1	3052	12	13	53.4	0	19	57.4	1.48436	193	4.99098	69	0.77901	5.5	36.615	1	2	104	5.77304	112	68	0	8.18535
9341	0	31	191.1	0	17.8643	58.7	0	0	0	3568	8	10	48.4	0	16	56.6	1.46368	168	4.34448	30	0.3387	4.6	26.778	3	1	90	4.9959	95.5	58.5	0	7.20786
18960	0	43	12	0	17.8643	64	0	0	0	710	9	9	48.4	1	12	79	2.04294	234	6.05124	71	0.80159	5.1	32.243	1	1	88	4.88488	88	52.5	0	8.04687
7989	0	52	0	0	17.8652	62	0	0	0	1853	14	15	38.5	0	8	51.6	1.33438	220	5.6892	35	0.39515	5.4	35.522	1	1	85	4.71835	88.5	58	0	7.30485
8832	0	58	0	0	17.8657	70.5	0	0	0	3373	16	21	44.6	0	12	55.2	1.42747	214	5.53404	54	0.60966	5.2	33.336	1	1	91	5.05141	95.5	62.5	0	7.8067
19827	0	38	45.5	0	17.8689	73	0	0	0	721	9	8	54.1	0	18	82	2.12052	195	5.0427	43	0.48547	5.1	32.243	1	1	104	5.77304	129	73.5	0	7.71244
9805	0	34	1	0	17.8717	64.5	0	0	0	4019	16	18	42	0	23	54.5	1.40937	180	4.6548	74	0.83546	5.1	32.243	1	1	90	4.9959	90	56	0	8.11073
14284	0	30	4.2	0	17.8726	65.5	0	0	0	2413	12	15	44.9	0	12	70.7	1.8283	183	4.73238	47	0.53063	5.2	33.336	1	1	98	5.43998	92	56	0	7.74197
2156	1	34	126	0	17.8735	65.5	0	0	1	2195	16	21	53	0	18	43.5	1.12491	184	4.75824	176	1.98704	5.4	35.522	2	3	93	5.16243	111	73	0	9.00994
8210	1	35	54	0	17.8747	64.6	0	0	1	4452	25	17	48.9	0	17	83.8	2.16707	199	5.14614	34	0.38386	5.4	35.522	1	3	109	6.05059	122.5	76	0	7.52456
19667	0	40	12	0	17.8768	66	0	0	0	749	8	11	46.8	0	12	70	1.8102	153	3.95658	41	0.46289	5.4	35.522	1	1	89	4.94039	96.5	51	0	7.50906
1602	1	44	62	0	17.877	73.6	0	0	1	4381	9	10	57.6	0	15	64.5	1.66797	168	4.34448	48	0.54192	5.2	33.336	1	3	87	4.82937	132	87.5	0	7.64396
12731	0	56	252	0	17.8773	71.2	0	0	0	2234	14	12	48.2	0	27	49.5	1.28007	254	6.56844	123	1.38867	4.9	30.057	3	3	87	4.82937	128.5	87	0	8.58495
2608	0	50	36	0	17.8783	60.5	0	0	0	4687	18	18	46.4	0	17	77.3	1.99898	206	5.32716	38	0.42902	5.2	33.336	1	1	88	4.88488	97.5	61.5	0	7.42178
5038	1	54	66	0	17.8784	67.5	0	0	1	1818	18	16	50.4	0	31	55	1.4223	211	5.45646	70	0.7903	4.8	28.964	1	1	82	4.55182	116	75	0	7.96207
14044	0	36	18	0	17.879	63.5	0	0	0	2156	11	16	45.2	0	12	55.4	1.43264	165	4.2669	24	0.27096	4.8	28.964	1	1	82	4.55182	115	73	0	6.89163
18067	0	30	54	0	17.8795	66	0	0	0	671	15	13	48.5	0	21	82	2.12052	149	3.85314	43	0.48547	5.1	32.243	1	1	89	4.94039	115.5	64	0	7.55669
16646	0	40	2.8	0	17.8795	65	0	0	0	358	13	21	45.6	1	12	68	1.75848	161	4.16346	45	0.50805	5	31.15	1	1	82	4.55182	103	68.5	0	7.52023
13273	0	41	0	0	17.8795	73.5	0	0	0	2526	19	22	45.6	1	14	70.4	1.82054	195	5.0427	19	0.21451	4.8	28.964	1	1	85	4.71835	119.5	75	0	6.69394
16392	0	36	0	0	17.8831	65	0	0	0	1833	15	24	44.7	0	14	49	1.26714	150	3.879	67	0.75643	5	31.15	1	2	90	4.9959	108	73	0	8.01136
7086	1	52	54.6	0	17.8842	63.4	0	0	1	2541	26	28	47.4	1	22	59.3	1.5335	227	5.87022	106	1.19674	5.1	32.243	1	3	109	6.05059	97.5	65	0	8.66164
13647	0	35	0	0	17.8881	67	0	0	0	303	12	18	43.7	0	11	61.2	1.58263	163	4.21518	23	0.25967	5	31.15	1	1	81	4.49631	102	68.5	0	6.8368
20119	1	48	36	0	17.8884	66.5	0	0	1	731	8	13	53.6	0	15	51	1.31886	140	3.6204	38	0.42902	5.1	32.243	1	3	89	4.94039	98.5	54.5	0	7.43308
7233	0	36	0	0	17.8884	61.3	0	0	0	4410	13	15	42.7	0	9	75.3	1.94726	168	4.34448	33	0.37257	5.1	32.243	1	1	92	5.10692	81	49.5	0	7.32515
7397	0	37	0	0	17.8904	58.2	0	0	0	439	14	16	47.3	0	9	93.7	2.42308	192	4.96512	53	0.59837	4.8	28.964	1	1	91	5.05141	92	59	0	7.788
16415	0	48	0	0	17.8904	73	0	0	0	1561	14	21	47.3	0	28	56	1.44816	192	4.96512	118	1.33222	5.4	35.522	1	1	85	4.71835	115	76	0	8.52019
4122	0	39	9.1	0	17.8906	65.8	0	0	0	3316	11	19	45.4	0	9	60.2	1.55677	151	3.90486	37	0.41773	5.5	36.615	1	1	89	4.94039	81	56	0	7.40641
18167	0	45	0	0	17.8928	62	0	0	0	1460	15	17	42.6	0	18	72	1.86192	175	4.5255	77	0.86933	5.4	35.522	1	1	92	5.10692	121.5	76	0	8.17245
4325	0	48	0	0	17.8936	66	0	0	0	1296	11	12	44.5	0	10	62.1	1.60591	206	5.32716	78	0.88062	5.2	33.336	1	1	85	4.71835	87	52.5	0	8.10621
10736	0	35	0	0	17.8946	65	0	0	0	3601	15	16	46.5	0	10	84.2	2.17741	170	4.3962	28	0.31612	5.044	31.6309	1	1	92	5.10692	113	71	0	7.16085
3389	0	41	4.55	0	17.8946	68.5	0	0	0	2855	10	16	46.5	0	9	77.9	2.01449	206	5.32716	41	0.46289	5.2	33.336	1	1	86	4.77386	97.5	59	0	7.47477
5510	1	44	1	0	17.8953	69.5	0	0	1	4375	14	15	51.9	0	12	43.7	1.13008	159	4.11174	38	0.42902	5	31.15	1	3	83	4.60733	104.5	61	0	7.36328
12228	0	37	0	0	17.8963	65	0	0	0	2093	16	16	45.7	0	13	86.5	2.23689	192	4.96512	33	0.37257	5.1	32.243	1	1	87	4.82937	97	60.5	0	7.26927
3704	1	45	36	0	17.8963	68	0	0	1	4529	11	9	53.5	0	16	76.3	1.97312	218	5.63748	60	0.6774	4.9	30.057	1	3	94	5.21794	97.5	64.5	0	7.94449
874	0	44	0	0	17.8987	57.2	0	0	0	728	19	28	44.4	1	11	61.2	1.58263	191	4.93926	60	0.6774	4.5	25.685	1	1	78	4.32978	88.5	55	0	7.75791
7383	0	41	154	0	17.8987	66	0	0	0	374	12	18	44.4	0	11	70.1	1.81279	161	4.16346	46	0.51934	4.9	30.057	3	3	85	4.71835	100	61	0	7.57815
19166	0	57	1	0	17.8991	62	0	0	0	1064	16	17	41.9	0	16	86	2.22396	219	5.66334	28	0.31612	5.4	35.522	1	1	99	5.49549	136	80.5	0	7.23418
17224	0	32	0	0	17.9005	75	0	0	0	235	25	21	46.4	0	14	65	1.6809	126	3.25836	20	0.2258	5.2	33.336	1	1	84	4.66284	101	62	0	6.7334
5338	0	42	12	0	17.9027	63.6	0	0	0	4396	19	19	47.1	0	37	64.6	1.67056	209	5.40474	49	0.55321	4.6	26.778	1	1	85	4.71835	107.5	69	0	7.64132
14366	1	39	0	0	17.9055	64.5	0	0	1	2874	20	32	48.1	0	19	56.9	1.47143	166	4.29276	102	1.15158	5.2	33.336	1	1	88	4.88488	115	76	0	8.40916
10008	1	49	308	0	17.9062	76.2	0	0	1	2540	84	94	50.9	0	250	41	1.06026	177	4.57722	500	5.645	5	31.15	4	3	104	5.77304	142	97	0	10.1659
20128	0	22	8.4	0	17.9072	65	0	0	0	343	8	8	43.3	0	8	82	2.12052	142	3.67212	24	0.27096	5.3	34.429	1	1	82	4.55182	104.5	62	0	6.89163
11548	0	46	60	0	17.9078	68.7	0	0	0	2491	15	16	40.4	0	8	54.1	1.39903	172	4.44792	49	0.55321	4.9	30.057	1	1	82	4.55182	107	65.5	0	7.60539
10543	0	37	0	0	17.9109	64	0	0	0	2729	14	16	46.6	0	9	79.1	2.04553	224	5.79264	44	0.49676	5.044	31.6309	1	1	76	4.21876	97	58	0	7.42178
5660	0	50	0	0	17.911	59	0	0	0	1792	12	13	44.6	0	18	70.8	1.83089	217	5.61162	63	0.71127	5.7	38.801	1	1	95	5.27345	108.5	69.5	0	8.00386
3394	0	43	1	0	17.9124	67.8	0	0	0	2461	12	15	47.3	0	14	66.3	1.71452	167	4.31862	53	0.59837	4.738	28.2863	1	1	91	5.05141	87.5	54	0	7.788
19039	0	33	0	0	17.913	70	0	0	0	357	12	9	45.8	0	12	69	1.78434	152	3.93072	64	0.72256	5.4	35.522	1	1	93	5.16243	123	81	0	7.99834
6465	0	44	0	0	17.9131	64.8	0	0	0	4378	10	13	45.4	0	17	73	1.88778	171	4.42206	25	0.28225	4.7	27.871	1	1	86	4.77386	93.5	60.5	0	6.98008
2809	0	38	12	0	17.9186	58	0	0	0	4391	11	10	45.3	0	7	64.9	1.67831	215	5.5599	48	0.54192	5.1	32.243	1	1	90	4.9959	105	68.5	0	7.67786
20404	1	36	1	0	17.9186	64	0	0	1	417	24	22	47.2	0	12	86	2.22396	255	6.5943	36	0.40644	5.6	37.708	1	3	94	5.21794	111	71.5	0	7.43367
7982	0	51	1	0	17.919	65.5	0	0	0	2182	11	14	41.4	0	9	50.6	1.30852	174	4.49964	52	0.58708	5.2	33.336	1	2	81	4.49631	87	51.5	0	7.65255
13792	1	30	18	0	17.92	67	0	0	1	2917	13	18	52.4	0	17	53.2	1.37575	169	4.37034	54	0.60966	4.9	30.057	1	1	90	4.9959	105.5	70	0	7.79565
9926	1	37	1	0	17.92	73	0	0	1	3904	17	16	52.4	0	16	41.4	1.0706	181	4.68066	74	0.83546	5	31.15	1	1	99	5.49549	106	69.5	0	8.20604
17155	0	46	0	0	17.9207	62	0	0	0	347	9	17	43.5	0	14	66	1.70676	205	5.3013	20	0.2258	5.4	35.522	1	1	86	4.77386	89.5	54.5	0	6.75693
14884	0	62	0	0	17.9207	63	0	0	0	2017	17	19	43.5	0	14	63.1	1.63177	172	4.44792	59	0.66611	5.1	32.243	1	1	99	5.49549	127.5	80	0	7.97951
14993	0	48	1	0	17.921	70.5	0	0	0	1087	19	20	46.8	0	18	84.7	2.19034	223	5.76678	48	0.54192	5.6	37.708	1	1	91	5.05141	115	76	0	7.68891
15675	0	52	0	0	17.9225	65	0	0	0	1446	20	25	41.9	0	15	83.2	2.15155	198	5.12028	35	0.39515	5.1	32.243	1	1	88	4.88488	115	71	1	7.33954
15768	0	30	1	0	17.924	60	0	0	0	273	13	17	43.9	0	11	57	1.47402	150	3.879	28	0.31612	5.4	35.522	1	2	90	4.9959	89	58	0	7.13887
13666	0	34	0	0	17.9244	66.5	0	0	0	2936	25	22	45.6	0	15	69.6	1.79986	182	4.70652	51	0.57579	5.6	37.708	1	1	86	4.77386	103.5	68	0	7.69303
20129	0	28	18	0	17.9248	67	0	0	0	385	11	11	47.8	1	9	84	2.17224	155	4.0083	41	0.46289	5.1	32.243	1	1	85	4.71835	102	60	0	7.46308
9518	0	35	0	0	17.9266	61	0	0	0	4011	11	14	41.2	0	10	57.5	1.48695	205	5.3013	60	0.6774	4.7	27.871	1	1	86	4.77386	92	58	0	7.85554
17897	1	31	0	0	17.9274	66	0	0	1	1484	14	15	50.9	1	15	52	1.34472	148	3.82728	26	0.29354	5.2	33.336	1	1	96	5.32896	105.5	56	0	7.1293
17630	0	34	0	0	17.9278	74	0	0	0	217	16	21	52.3	0	12	78	2.01708	145	3.7497	60	0.6774	5.1	32.243	1	1	83	4.60733	108	60.5	0	7.82004
12058	1	35	84	0	17.9297	73.4	0	0	1	3289	14	17	57	0	23	48.9	1.26455	216	5.58576	84	0.94836	5	31.15	2	2	99	5.49549	98	55.5	0	8.33279
19130	0	39	0	0	17.9302	62	0	0	0	1099	20	15	43.3	0	14	79	2.04294	170	4.3962	42	0.47418	5.2	33.336	1	1	98	5.43998	99.5	60	0	7.62949
6501	0	33	1	0	17.9303	63	0	0	0	2486	18	14	42.8	0	13	59.5	1.53867	216	5.58576	88	0.99352	4.8	28.964	1	1	84	4.66284	109	65	0	8.21501
19328	1	40	1	0	17.9307	65	0	0	1	1099	15	32	54.1	1	16	75	1.9395	177	4.57722	55	0.62095	5.4	35.522	1	1	90	4.9959	97.5	58.5	0	7.814
11804	0	35	0	0	17.9312	64.4	0	0	0	2506	9	16	47.7	0	12	51.3	1.32662	140	3.6204	34	0.38386	5.146	32.7458	1	1	102	5.66202	95.5	58	0	7.45819
16516	1	35	1	0	17.9314	64	0	0	1	1862	18	23	51.7	0	12	45	1.1637	141	3.64626	41	0.46289	5.1	32.243	1	1	90	4.9959	96.5	67	0	7.52023
17984	1	57	1	0	17.9348	65	0	0	1	1448	16	18	50.8	0	29	78	2.01708	222	5.74092	63	0.71127	5.2	33.336	1	2	94	5.21794	132	82.5	0	7.99328
19563	0	45	1	0	17.935	67	0	0	0	721	8	9	45	1	12	66	1.70676	182	4.70652	47	0.53063	5.3	34.429	1	1	85	4.71835	92.5	54	0	7.59965
20841	1	41	1	0	17.9358	72	0	0	1	365	10	14	56.7	0	8	61	1.57746	186	4.80996	57	0.64353	5.2	33.336	1	1	94	5.21794	133	92.5	0	7.8932
17213	0	57	0	0	17.9369	73	0	0	0	816	20	26	44.1	0	16	64	1.65504	189	4.88754	81	0.91449	5.7	38.801	1	1	94	5.21794	121	73	0	8.2446
18482	0	30	36	0	17.9376	63	0	0	0	836	14	19	42.1	0	11	93	2.40498	166	4.29276	30	0.3387	5	31.15	1	1	91	5.05141	97	63.5	0	7.21891
10291	0	43	27.3	0	17.9388	70	0	0	0	4199	11	15	43.6	0	11	77.2	1.99639	201	5.19786	34	0.38386	4.8	28.964	1	2	89	4.94039	107	70.5	0	7.32185
16662	1	56	21	0	17.939	66	0	0	1	1433	15	22	51.6	0	18	60	1.5516	259	6.69774	65	0.73385	5	31.15	1	1	93	5.16243	122.5	71.5	0	8.01384
1929	0	44	0	0	17.9391	58.4	0	0	0	4401	13	10	46.5	1	11	76.9	1.98863	169	4.37034	60	0.6774	4.8	28.964	1	1	82	4.55182	108.5	67	0	7.80792
4608	0	50	0	0	17.9393	63.4	0	0	0	4421	15	20	42.6	0	7	87	2.24982	223	5.76678	46	0.51934	5.7	38.801	1	1	87	4.82937	93	60.5	0	7.6014
16422	0	41	0	0	17.9397	64	0	0	0	763	9	10	48.9	0	9	87	2.24982	183	4.73238	29	0.32741	5.4	35.522	1	1	99	5.49549	109.5	72	0	7.26927
20464	1	30	8.4	0	17.9404	73	0	0	1	364	4	13	62.2	0	29	69	1.78434	164	4.24104	45	0.50805	5.1	32.243	1	2	92	5.10692	114.5	66.5	0	7.6353
3010	0	38	0	0	17.9421	68	0	0	0	3215	13	12	50.7	0	9	45.7	1.1818	207	5.35302	55	0.62095	4.6	26.778	1	1	89	4.94039	103.5	67.5	0	7.80282
7784	0	27	1	0	17.9437	59.2	0	0	0	2577	12	17	42.5	0	6	59	1.52574	220	5.6892	65	0.73385	4.6	26.778	1	1	81	4.49631	98	62	0	7.87569
6732	0	56	154	0	17.944	64	0	0	0	372	13	15	47.5	0	11	48.2	1.24645	257	6.64602	149	1.68221	5.1	32.243	3	3	85	4.71835	107.5	64.5	0	8.75345
6267	0	35	0	0	17.9463	64	0	0	0	2104	10	19	46	0	10	71	1.83606	184	4.75824	142	1.60318	5.1	32.243	1	1	89	4.94039	90.5	57	0	8.75132
4916	0	63	0	0	17.9465	55	0	0	0	739	10	18	41.3	1	8	95.5	2.46963	228	5.89608	50	0.5645	4.9	30.057	1	1	89	4.94039	142.5	95	0	7.70751
1684	1	41	0	0	17.9487	65	0	0	1	2709	16	12	50.9	1	14	71.6	1.85158	178	4.60308	43	0.48547	4.7	27.871	1	1	94	5.21794	112.5	71	0	7.61135
10911	0	35	0	0	17.9489	67.4	0	0	0	1816	10	15	42.9	0	9	82.8	2.14121	259	6.69774	41	0.46289	4.942	30.5161	1	1	79	4.38529	96	62	0	7.38987
11527	1	58	0	0	17.9517	71.5	0	0	1	231	14	21	52.8	0	8	37.7	0.974922	140	3.6204	46	0.51934	5.452	36.0904	1	3	81	4.49631	122	77.5	0	7.52994
10181	0	21	0	0	17.9522	64.8	0	0	0	720	10	15	45.1	0	10	52.5	1.35765	162	4.18932	47	0.53063	5.2	33.336	1	1	88	4.88488	109.5	68	0	7.63434
12893	0	42	0	0	17.9533	64	0	0	0	1094	13	19	43.3	1	10	68.9	1.78175	175	4.5255	40	0.4516	5.6	37.708	1	1	76	4.21876	95	59.5	0	7.32647
19196	0	29	1	0	17.9542	65	0	0	0	427	11	10	41.7	0	7	66	1.70676	179	4.62894	39	0.44031	5.1	32.243	1	1	86	4.77386	109.5	66.5	0	7.42476
13194	0	31	0	0	17.9542	65.5	0	0	0	1361	18	16	41.7	1	12	56.9	1.47143	179	4.62894	98	1.10642	5.4	35.522	1	3	85	4.71835	94	58.5	0	8.33447
20085	0	49	1	0	17.9543	63	0	0	0	778	7	14	39.7	0	11	100	2.586	227	5.87022	102	1.15158	5.3	34.429	1	1	81	4.49631	111	61	0	8.32627
9707	0	31	1	0	17.9557	67.5	0	0	0	1249	21	14	49.3	0	9	65.2	1.68607	162	4.18932	47	0.53063	4.7	27.871	1	1	95	5.27345	110	61	0	7.71088
9908	1	56	308	0	17.9559	67	0	0	1	3827	13	17	56	0	20	54.2	1.40161	157	4.06002	73	0.82417	5.1	32.243	4	3	95	5.27345	111.5	73	0	8.15119
13726	1	39	220	0	17.9597	63	0	0	1	1119	23	29	47.6	0	26	42.2	1.09129	134	3.46524	68	0.76772	5.1	32.243	3	2	89	4.94039	102	67.5	0	8.015
20615	0	41	252	0	17.9599	71	0	0	0	376	4	11	48.6	0	11	91	2.35326	207	5.35302	29	0.32741	5	31.15	3	3	76	4.21876	95	58.5	0	7.00488
221	1	43	126	0	17.9602	66.7	0	0	1	4374	22	27	51.6	1	52	81.7	2.11276	153	3.95658	63	0.71127	4.5	25.685	2	3	82	4.55182	128.5	75.5	0	7.85671
16527	0	38	0	0	17.9602	77	0	0	0	1090	17	15	51.6	0	12	84	2.17224	193	4.99098	45	0.50805	5.1	32.243	1	1	81	4.49631	101.5	56	0	7.50796
8084	1	52	308	0	17.9614	63	0	0	1	2851	21	20	48.9	0	22	60.8	1.57229	173	4.47378	56	0.63224	4.8	28.964	4	3	84	4.66284	111	69.5	0	7.76302
6260	0	41	0	0	17.9616	60	0	0	0	4375	12	14	40.9	0	6	53.8	1.39127	198	5.12028	46	0.51934	5.4	35.522	1	1	81	4.49631	87.5	54	0	7.52994
17024	0	47	1	0	17.9628	66	0	0	0	1930	11	19	43.1	1	15	89	2.30154	272	7.03392	26	0.29354	5.5	36.615	1	1	103	5.71753	114.5	72	0	7.19968
19113	0	34	0	0	17.9629	67	0	0	0	1251	9	12	46.1	0	11	52	1.34472	146	3.77556	30	0.3387	5	31.15	1	1	80	4.4408	90.5	55.5	0	7.09008
18654	0	42	169.2	0	17.9634	68	0	0	0	914	13	10	49.5	0	13	79	2.04294	171	4.42206	53	0.59837	5.1	32.243	3	1	99	5.49549	97	54.5	0	7.87226
8132	1	52	110	0	17.9645	70.4	0	0	1	1854	20	21	55.9	0	15	53.9	1.39385	171	4.42206	26	0.29354	5.1	32.243	2	1	92	5.10692	126	79.5	0	7.08674
10709	0	36	1	0	17.9647	62	0	0	0	721	15	20	48.2	1	9	84.5	2.18517	228	5.89608	50	0.5645	4.942	30.5161	1	1	79	4.38529	87.5	57	0	7.58832
10515	0	39	31.85	0	17.966	65.3	0	0	0	2962	13	19	47.5	0	9	78.1	2.01967	190	4.9134	64	0.72256	4.7	27.871	1	1	87	4.82937	97	64.5	0	7.93164
15402	0	35	5.13333	0	17.9661	68	0	0	0	2231	11	19	51.8	0	15	54	1.39644	148	3.82728	35	0.39515	4.8	28.964	1	1	90	4.9959	85.5	57.5	0	7.36201
14414	1	62	1	0	17.9666	72	0	0	1	731	14	12	48.5	0	28	45.2	1.16887	223	5.76678	95	1.07255	4.7	27.871	1	2	96	5.32896	105.5	64	0	8.42508
8344	0	46	0	0	17.9698	66.2	0	0	0	4402	14	13	52.3	0	12	75.4	1.94984	241	6.23226	52	0.58708	5	31.15	1	1	94	5.21794	92	51.5	0	7.80139
7193	1	36	1	0	17.9713	66.4	0	0	1	4554	10	22	53.6	1	11	40.2	1.03957	153	3.95658	55	0.62095	5.2	33.336	1	1	91	5.05141	87	58.5	0	7.82505
2987	0	39	0	0	17.9716	56.3	0	0	0	3292	12	12	46.7	1	10	87.5	2.26275	213	5.50818	61	0.68869	5	31.15	1	1	84	4.66284	105	69	0	7.84854
5936	0	39	1	0	17.9716	65	0	0	0	4382	10	14	46.7	0	10	80.4	2.07914	201	5.19786	45	0.50805	5	31.15	1	1	73	4.05223	97	56.5	0	7.40397
1748	0	40	0	0	17.9716	65.3	0	0	0	4011	39	28	46.7	0	39	48.2	1.24645	191	4.93926	81	0.91449	4.8	28.964	1	1	80	4.4408	84	56.5	0	8.08333
13814	0	41	0	0	17.9719	66	0	0	0	2960	12	15	52	0	8	49.3	1.2749	144	3.72384	20	0.2258	5.2	33.336	1	1	88	4.88488	99.5	57.5	0	6.77992
11024	0	49	1	0	17.9722	64.5	0	0	0	3622	21	25	42.9	1	14	86.5	2.23689	203	5.24958	33	0.37257	5.044	31.6309	1	1	91	5.05141	121	74.5	0	7.31422
16321	0	39	1	0	17.9734	71.5	0	0	0	2128	18	23	46.3	1	12	68	1.75848	206	5.32716	55	0.62095	5.2	33.336	1	1	84	4.66284	107	62	0	7.745
1406	0	70	0	0	17.9751	61.4	0	0	0	2613	19	11	45.5	1	10	53.1	1.37317	230	5.9478	96	1.08384	5.5	36.615	1	1	95	5.27345	113	58.5	0	8.42508
3807	1	43	122.5	0	17.9765	69.8	0	0	1	728	12	18	51.1	0	12	83.7	2.16448	193	4.99098	104	1.17416	5	31.15	2	1	85	4.71835	96.5	61.5	0	8.39389
3425	0	51	36	0	17.9768	68	0	0	0	742	11	16	42.8	0	25	89	2.30154	205	5.3013	54	0.60966	5.2	33.336	1	1	99	5.49549	125.5	77.5	0	7.89096
380	1	64	44	0	17.9776	76	0	0	1	1839	11	19	52.2	1	21	46	1.18956	171	4.42206	74	0.83546	5.1	32.243	1	1	90	4.9959	136.5	82	0	8.11073
10655	0	33	1	0	17.9778	63	0	0	0	3910	9	18	48	0	9	62	1.60332	170	4.3962	38	0.42902	4.738	28.2863	1	1	89	4.94039	101	62	0	7.43308
14774	0	35	90	0	17.9787	67.5	0	0	0	2430	18	25	47.3	0	27	93.6	2.4205	196	5.06856	60	0.6774	5.1	32.243	2	1	98	5.43998	126.5	78.5	0	7.98616
9194	1	39	1	0	17.9797	70	0	0	1	2095	23	21	55	0	8	63.8	1.64987	172	4.44792	34	0.38386	4.7	27.871	1	1	85	4.71835	113.5	72.5	0	7.27586
8379	0	35	1	0	17.9813	57	0	0	0	2772	8	12	43.2	0	7	77.5	2.00415	193	4.99098	44	0.49676	5.2	33.336	1	1	85	4.71835	97.5	61	0	7.53369
3129	0	40	12	0	17.9827	66	0	0	0	4403	13	13	44.1	1	7	47.3	1.22318	154	3.98244	42	0.47418	4.9	30.057	1	1	76	4.21876	84.5	51	0	7.37526
16158	1	33	1	0	17.9828	66	0	0	1	2184	14	19	51.3	0	15	44	1.13784	218	5.63748	42	0.47418	5	31.15	1	1	87	4.82937	94	53	0	7.51043
10976	0	40	0	0	17.9851	62.5	0	0	0	3683	19	19	47.2	0	41	50.9	1.31627	181	4.68066	65	0.73385	4.84	29.4012	1	1	91	5.05141	100	62	0	7.9921
12150	0	41	0	0	17.9851	69.5	0	0	0	3318	13	17	47.2	1	10	49.8	1.28783	151	3.90486	84	0.94836	5.5	36.615	1	1	81	4.49631	95.5	60.5	0	8.13212
8579	0	36	0	0	17.9851	63.8	0	0	0	726	11	12	49.5	0	11	89	2.30154	170	4.3962	42	0.47418	4.9	30.057	1	1	85	4.71835	103.5	61	0	7.48717
9085	0	45	90	0	17.9859	63	0	0	0	4123	12	17	42.6	0	9	71.2	1.84123	192	4.96512	37	0.41773	4.5	25.685	2	1	91	5.05141	109.5	69.5	0	7.42863
10390	1	48	84	0	17.9862	69	0	0	1	3889	15	20	60.3	0	22	57.2	1.47919	171	4.42206	47	0.53063	4.9	30.057	2	3	89	4.94039	103.5	63	0	7.64564
13520	0	34	1	0	17.9875	71.5	0	0	0	2877	11	14	53.4	0	14	56.2	1.45333	145	3.7497	25	0.28225	4.9	30.057	1	1	99	5.49549	98.5	60.5	0	7.12085
14464	0	38	0	0	17.9878	65	0	0	0	2584	18	17	46.8	1	12	62.9	1.62659	137	3.54282	30	0.3387	4.9	30.057	1	1	80	4.4408	102.5	66	0	7.09008
18416	0	36	0	0	17.9885	69	0	0	0	1099	32	14	48.5	0	18	76	1.96536	233	6.02538	48	0.54192	5.5	36.615	1	1	79	4.38529	107.5	66.5	0	7.5475
15447	0	40	4.2	0	17.9909	67.5	0	0	0	689	20	27	52.3	0	15	94	2.43084	214	5.53404	51	0.57579	4.6	26.778	1	1	86	4.77386	106.5	67.5	0	7.69303
9643	0	38	18	0	17.9912	66.3	0	0	0	2564	20	18	46	0	14	49	1.26714	200	5.172	56	0.63224	5.1	32.243	1	1	87	4.82937	107.5	70	0	7.79811
20542	0	45	60	0	17.992	64	0	0	0	369	10	14	45.2	0	12	109	2.81874	230	5.9478	45	0.50805	5.5	36.615	1	1	105	5.82855	129.5	84.5	0	7.76748
17563	1	36	2.8	0	17.9926	66.5	0	0	1	1445	25	23	49.7	0	12	79	2.04294	160	4.1376	40	0.4516	5	31.15	1	1	96	5.32896	125	80.5	0	7.56008
2306	0	45	0	0	17.9966	62.1	0	0	0	4528	20	20	51.4	1	10	70.4	1.82054	185	4.7841	25	0.28225	5.2	33.336	1	1	90	4.9959	99.5	65.5	0	7.02554
16563	1	40	4.2	0	18.0011	66.5	0	0	1	1820	15	23	54.5	0	15	62	1.60332	172	4.44792	50	0.5645	5.1	32.243	1	1	93	5.16243	105.5	65	0	7.75148
14147	1	60	126	0	18.0034	69	0	0	1	2489	14	19	45.4	1	21	48.9	1.26455	150	3.879	40	0.4516	5.5	36.615	2	2	108	5.99508	131.5	85.5	0	7.67786
9887	0	36	0	0	18.0037	62.5	0	0	0	3977	13	15	42.2	0	7	44.8	1.15853	144	3.72384	55	0.62095	5	31.15	1	1	94	5.21794	120	72.5	0	7.85748
12411	0	46	110	0	18.0069	79	0	0	0	2574	13	19	50.4	1	13	60.6	1.56712	157	4.06002	51	0.57579	5	31.15	2	1	91	5.05141	103.5	59.5	0	7.74954
4208	0	39	36	0	18.0087	61	0	0	0	4371	9	15	44.9	0	11	63.4	1.63952	158	4.08588	35	0.39515	4.5	25.685	1	1	84	4.66284	100.5	67	0	7.29302
9596	0	35	1	0	18.0105	65.6	0	0	0	367	14	14	48.5	0	10	57.5	1.48695	150	3.879	45	0.50805	4.8	28.964	1	2	84	4.66284	94.5	57.5	0	7.54433
20281	1	35	0	0	18.0117	70	0	0	1	392	25	21	53.1	0	16	48	1.24128	225	5.8185	134	1.51286	5.6	37.708	1	2	101	5.60651	110	69	0	8.81981
9976	0	35	57.5	0	18.013	66.5	0	0	0	350	12	12	47.8	0	9	49.2	1.27231	176	4.55136	40	0.4516	5.2	33.336	1	3	92	5.10692	95	59	0	7.51752
3918	1	37	4.2	0	18.013	67.3	0	0	1	4292	23	16	53.6	0	15	50.3	1.30076	203	5.24958	41	0.46289	4.8	28.964	1	1	74	4.10774	82	49.5	0	7.32449
10140	0	24	0	0	18.0131	70.5	0	0	0	3976	9	17	49.1	0	9	63.2	1.63435	179	4.62894	37	0.41773	4.7	27.871	1	1	89	4.94039	95	56	0	7.40641
13786	0	32	1	0	18.0137	67.5	0	0	0	2898	11	18	50.6	0	12	56.9	1.47143	148	3.82728	35	0.39515	4.8	28.964	1	1	94	5.21794	92.5	57	0	7.4055
16237	0	50	54	0	18.0142	76	0	0	0	2081	14	24	44.8	1	14	66	1.70676	207	5.35302	45	0.50805	5.2	33.336	1	1	85	4.71835	112	66	0	7.55617
17365	0	34	0	0	18.0153	65.5	0	0	0	1543	7	8	48.1	0	10	55	1.4223	175	4.5255	27	0.30483	5.1	32.243	1	1	87	4.82937	93.5	51	0	7.0686
11956	0	36	47	0	18.0153	68.8	0	0	0	3455	10	15	48.1	0	11	56.6	1.46368	145	3.7497	12	0.13548	5.5	36.615	1	1	96	5.32896	100	63.5	0	6.35611
9493	0	38	1	0	18.0182	66	0	0	0	698	14	14	44.3	0	12	68.1	1.76107	211	5.45646	75	0.84675	5.1	32.243	1	1	76	4.21876	99	64	0	7.95507
19968	0	31	1	0	18.0183	63	0	0	0	692	12	9	46.3	0	13	74	1.91364	200	5.172	96	1.08384	5.2	33.336	1	1	90	4.9959	97	55.5	0	8.37101
1058	0	56	22	0	18.0184	60.8	0	0	0	666	20	25	42.4	0	9	58.9	1.52315	153	3.95658	49	0.55321	4.9	30.057	1	1	98	5.43998	95.5	63.5	0	7.78364
17451	0	57	0	0	18.0197	72	0	0	0	737	18	30	45.9	0	16	102	2.63772	262	6.77532	88	0.99352	4.7	27.871	1	1	92	5.10692	110.5	72	0	8.30598
12265	0	42	0	0	18.02	74	0	0	0	2571	20	20	49	0	20	95.4	2.46704	203	5.24958	39	0.44031	5.4	35.522	1	1	96	5.32896	119	63	0	7.53476
19940	1	39	110	0	18.02	70	0	0	1	739	7	11	56.2	0	11	69	1.78434	192	4.96512	39	0.44031	5.3	34.429	2	1	91	5.05141	98.5	57.5	0	7.48127
12009	0	33	0	0	18.0232	65.2	0	0	0	3360	12	15	47.3	0	9	67	1.73262	179	4.62894	13	0.14677	5	31.15	1	1	85	4.71835	96	56.5	0	6.31445
5153	1	60	60	0	18.0239	67	0	0	1	1640	14	19	51.6	0	16	64.7	1.67314	221	5.71506	64	0.72256	5.2	33.336	1	1	86	4.77386	146.5	91	0	7.92008
9330	0	43	0	0	18.0255	59	0	0	0	2607	9	11	41.1	0	10	52.9	1.36799	179	4.62894	45	0.50805	5	31.15	1	3	93	5.16243	104	64	0	7.64611
10996	0	40	1	0	18.0279	68.5	0	0	0	3689	11	12	49.2	0	6	48.8	1.26197	172	4.44792	78	0.88062	4.738	28.2863	1	1	82	4.55182	84	45	0	8.07028
5248	0	40	84	0	18.0286	60.4	0	0	0	732	14	14	46.5	0	8	56.5	1.46109	154	3.98244	29	0.32741	4.9	30.057	2	1	88	4.88488	91	58.5	0	7.15149
14232	0	54	0	0	18.0288	66	0	0	0	1727	25	21	49.8	0	26	90.7	2.3455	272	7.03392	92	1.03868	5.9	40.987	1	1	90	4.9959	120	70	0	8.32845
19467	0	45	1	0	18.0305	64	0	0	0	817	17	20	44.5	0	13	81	2.09466	138	3.56868	19	0.21451	5.3	34.429	1	1	94	5.21794	113.5	63.5	0	6.79459
6467	1	46	0	0	18.0306	65.4	0	0	1	4385	14	8	52.6	1	13	40.5	1.04733	187	4.83582	64	0.72256	4.9	30.057	1	3	100	5.551	96.5	56.5	0	8.07091
303	1	43	308	0	18.032	74	0	0	1	710	13	15	63.8	0	18	97.6	2.52394	199	5.14614	29	0.32741	5.2	33.336	4	3	95	5.27345	102.5	61.5	0	7.22803
19107	0	39	2.8	0	18.0326	64.5	0	0	0	1106	8	10	43.1	0	13	55	1.4223	151	3.90486	51	0.57579	5	31.15	1	1	94	5.21794	121	67.5	0	7.78197
12765	0	29	1	0	18.0339	66.5	0	0	0	2923	18	20	44	0	11	53.7	1.38868	174	4.49964	49	0.55321	4.9	30.057	1	1	84	4.66284	106.5	63	0	7.62949
2884	0	40	0	0	18.0343	56	0	0	0	1841	11	13	38.6	1	7	76.7	1.98346	163	4.21518	50	0.5645	5.1	32.243	1	1	96	5.32896	94.5	60	0	7.78322
14569	0	31	12	0	18.0359	64	0	0	0	392	15	18	44.4	0	12	70.4	1.82054	162	4.18932	18	0.20322	5.4	35.522	1	1	79	4.38529	99	62	0	6.56667
11356	0	39	1	0	18.0373	65.6	0	0	0	763	12	17	42.5	1	10	83.1	2.14897	214	5.53404	45	0.50805	5.7	38.801	1	1	92	5.10692	129.5	71	0	7.6353
17880	1	34	126	0	18.0379	62	0	0	1	1463	10	11	54.8	1	14	78	2.01708	164	4.24104	22	0.24838	5.6	37.708	2	3	96	5.32896	116.5	71	0	6.96224
3203	0	43	60	0	18.0391	63.2	0	0	0	4394	9	12	43.9	0	8	60.4	1.56194	166	4.29276	17	0.19193	4.4	24.592	1	1	74	4.10774	101	58.5	0	6.44413
6730	0	63	0	0	18.0403	57.2	0	0	0	1449	17	20	41.9	0	13	41.8	1.08095	192	4.96512	91	1.02739	4.7	27.871	1	1	89	4.94039	98.5	62	0	8.30635
14699	0	45	1	0	18.0407	69.5	0	0	0	357	11	15	48.7	0	12	76	1.96536	195	5.0427	48	0.54192	5.2	33.336	1	1	94	5.21794	91	60	0	7.72135
19673	1	47	0	0	18.0451	68	0	0	1	749	20	26	55.2	0	11	102	2.63772	271	7.00806	24	0.27096	5.2	33.336	1	1	89	4.94039	100	58	0	6.97354
4224	0	44	12	0	18.046	65.2	0	0	0	1376	34	22	48.3	0	9	43.6	1.1275	137	3.54282	50	0.5645	5.5	36.615	1	1	89	4.94039	98.5	63	0	7.70751
8999	0	56	0	0	18.0469	60	0	0	0	406	17	18	42.8	1	13	94.9	2.45411	242	6.25812	59	0.66611	5.1	32.243	1	1	89	4.94039	103.5	68.5	0	7.87303
13199	0	35	1	0	18.0486	65.5	0	0	0	2682	11	15	46.9	0	10	45.2	1.16887	150	3.879	25	0.28225	5	31.15	1	1	86	4.77386	113	64.5	0	6.98008
15287	0	32	1	0	18.0511	68	0	0	0	2414	17	15	46.5	0	11	59.1	1.52833	185	4.7841	76	0.85804	4.9	30.057	1	1	85	4.71835	91	56.5	0	8.08024
16210	0	40	0	0	18.0535	73.5	0	0	0	1015	12	14	44.5	0	18	64	1.65504	238	6.15468	85	0.95965	5.3	34.429	1	1	100	5.551	110	55.5	0	8.35467
20842	0	33	1	0	18.0541	59	0	0	0	379	11	14	45.7	1	8	99	2.56014	198	5.12028	31	0.34999	5.1	32.243	1	1	92	5.10692	99	57.5	0	7.26263
3948	0	49	0	0	18.0541	60.5	0	0	0	4375	16	16	45.7	0	9	55.7	1.4404	228	5.89608	116	1.30964	5.4	35.522	1	1	93	5.16243	100	61	0	8.59304
12254	0	38	0	0	18.0549	60	0	0	0	2188	10	13	46.8	0	15	53.3	1.37834	129	3.33594	27	0.30483	4.7	27.871	1	1	78	4.32978	101	55.5	0	6.9594
13936	0	39	18	0	18.0549	69	0	0	0	1179	15	19	46.8	0	12	53.7	1.38868	163	4.21518	32	0.36128	5	31.15	1	1	86	4.77386	121.5	75.5	0	7.22694
8496	0	37	0	0	18.0568	65.5	0	0	0	4410	9	12	49.1	0	7	47.3	1.22318	126	3.25836	17	0.19193	5.1	32.243	1	1	87	4.82937	100.5	59.5	0	6.60597
11229	0	34	0	0	18.0573	66.7	0	0	0	1051	10	18	47.8	0	9	49.4	1.27748	184	4.75824	77	0.86933	5.554	37.2052	1	1	88	4.88488	101	60.5	0	8.128
15804	1	36	54	0	18.0574	66.5	0	0	1	1844	19	22	49.4	0	15	44	1.13784	144	3.72384	16	0.18064	5.1	32.243	1	3	97	5.38447	109.5	67	0	6.65415
10504	0	53	0	0	18.0574	69	0	0	0	4021	25	23	49.4	0	14	57.6	1.48954	233	6.02538	41	0.46289	5.5	36.615	1	1	107	5.93957	100.5	63.5	0	7.69325
15078	0	26	1	0	18.0583	64	0	0	0	1838	13	17	47.1	0	13	73	1.88778	179	4.62894	41	0.46289	5	31.15	1	1	87	4.82937	93.5	60.5	0	7.48633
6425	0	69	0	0	18.0588	67	0	0	0	977	28	29	40.2	0	62	89	2.30154	190	4.9134	45	0.50805	5	31.15	1	1	81	4.49631	116.5	59	0	7.50796
14798	0	42	7.9625	0	18.0595	68	0	0	0	2564	15	16	48.1	1	10	62.9	1.62659	174	4.49964	56	0.63224	5.5	36.615	1	1	93	5.16243	94.5	58	0	7.8648
20554	0	35	1	0	18.0595	66	0	0	0	401	6	10	43.5	0	9	85	2.1981	178	4.60308	29	0.32741	5.2	33.336	1	1	87	4.82937	113	70	0	7.14006
18878	0	35	0	0	18.06	68	0	0	0	731	8	10	45.6	0	8	75	1.9395	216	5.58576	50	0.5645	5	31.15	1	1	101	5.60651	122.5	78	0	7.834
15598	0	37	0	0	18.0643	66	0	0	0	2193	16	24	44.3	0	11	69.8	1.80503	183	4.73238	18	0.20322	5.6	37.708	1	2	84	4.66284	78	55.5	0	6.62804
16344	1	36	1	0	18.0645	63	0	0	1	1661	16	19	49.3	0	18	57	1.47402	167	4.31862	41	0.46289	5.4	35.522	1	3	92	5.10692	98.5	58	0	7.54221
14612	0	46	0	0	18.0645	63	0	0	0	2519	14	17	49.3	0	11	63.4	1.63952	194	5.01684	24	0.27096	5.2	33.336	1	3	77	4.27427	118.5	78.5	0	6.82871
15378	0	33	0	0	18.065	70.5	0	0	0	1425	18	21	49.9	0	10	57	1.47402	143	3.69798	34	0.38386	4.8	28.964	1	1	86	4.77386	95	58.5	0	7.28756
20365	0	57	4.24667	0	18.0675	55.5	0	0	0	304	15	21	43.8	0	15	97	2.50842	226	5.84436	59	0.66611	5.4	35.522	1	1	103	5.71753	110	68	0	8.01912
7175	0	42	154	0	18.0683	66	0	0	0	4018	31	34	41.8	1	23	51.2	1.32403	198	5.12028	116	1.30964	4.4	24.592	3	1	86	4.77386	133.5	82	0	8.51479
15559	0	35	0	0	18.0695	64.5	0	0	0	2220	23	20	46.2	0	12	71.9	1.85933	171	4.42206	17	0.19193	4.8	28.964	1	1	91	5.05141	109.5	61.5	0	6.65093
9002	0	36	1	0	18.0696	66.2	0	0	0	4356	7	13	48.6	0	5	56.2	1.45333	181	4.68066	39	0.44031	5.2	33.336	1	1	81	4.49631	86.5	54.5	0	7.36486
8809	0	31	120	0	18.0716	64.5	0	0	0	734	11	15	45.4	0	12	82.1	2.12311	153	3.95658	26	0.29354	4.6	26.778	2	1	89	4.94039	101.5	65.5	0	7.05359
7414	0	44	0	0	18.0717	61.8	0	0	0	370	12	16	45	0	7	89	2.30154	178	4.60308	43	0.48547	4.8	28.964	1	1	88	4.88488	101.5	61.5	0	7.54539
19565	1	35	72	0	18.0725	72	0	0	1	755	14	8	56.3	0	22	63	1.62918	158	4.08588	80	0.9032	5.3	34.429	2	3	105	5.82855	129.5	68.5	0	8.34284
11950	1	22	0	0	18.0729	67.5	0	0	1	3491	20	19	52.6	0	12	61.4	1.5878	183	4.73238	64	0.72256	5.1	32.243	1	1	96	5.32896	124	70	0	8.03008
14031	0	42	0	0	18.0744	62.5	0	0	0	2914	8	12	43.2	1	15	47.7	1.23352	199	5.14614	56	0.63224	5.2	33.336	1	1	82	4.55182	92	53	0	7.73892
18710	0	36	0	0	18.0759	62.5	0	0	0	1099	9	8	40.4	0	10	90	2.3274	244	6.30984	65	0.73385	5.2	33.336	1	1	101	5.60651	137	77.5	0	8.09636
7896	0	45	0	0	18.0774	67	0	0	0	3172	13	12	45.3	1	8	76.2	1.97053	238	6.15468	93	1.04997	5.1	32.243	1	1	87	4.82937	89.5	49.5	0	8.30536
9338	1	35	308	0	18.0778	69	0	0	1	4309	15	12	56.7	1	9	53	1.37058	149	3.85314	14	0.15806	5.1	32.243	4	2	93	5.16243	97	61.5	0	6.47851
1040	1	56	245	0	18.0781	65	0	0	1	2975	14	18	52	0	11	102.3	2.64548	233	6.02538	58	0.65482	5.9	40.987	3	1	101	5.60651	91.5	59	1	7.98242
14371	1	35	0	0	18.0793	70	0	0	1	682	23	21	49.4	0	16	64	1.65504	182	4.70652	27	0.30483	5.5	36.615	1	1	95	5.27345	101.5	64.5	0	7.15657
11936	0	67	54	0	18.0793	65.7	0	0	0	3385	10	15	43.1	0	10	70.9	1.83347	146	3.77556	23	0.25967	5.4	35.522	1	1	88	4.88488	109.5	76	0	6.91968
11973	0	44	0	0	18.0798	62.5	0	0	0	1547	15	14	46.4	0	11	50.8	1.31369	174	4.49964	15	0.16935	5.1	32.243	1	1	89	4.94039	102	58.5	0	6.50354
4975	1	56	154	0	18.0802	71	0	0	1	2957	12	14	51.7	0	13	58.2	1.50505	159	4.11174	71	0.80159	5.1	32.243	3	1	96	5.32896	114.5	72	0	8.13388
17313	0	35	0	0	18.0816	70.5	0	0	0	1767	10	19	46	0	14	64	1.65504	169	4.37034	45	0.50805	5.1	32.243	1	1	81	4.49631	112	73	0	7.50796
8180	0	41	68.25	0	18.0828	59	0	0	0	2846	20	20	43.5	1	16	78.1	2.01967	212	5.48232	49	0.55321	4.9	30.057	1	1	83	4.60733	95	58.5	0	7.61751
12232	1	47	413	0	18.0836	67	0	0	1	3276	15	21	51.1	0	13	77.2	1.99639	196	5.06856	51	0.57579	5	31.15	4	3	86	4.77386	108.5	65.5	0	7.69303
8967	0	34	0	0	18.0841	60.8	0	0	0	4410	10	15	54.5	0	11	71.3	1.84382	146	3.77556	24	0.27096	4.9	30.057	1	1	81	4.49631	97	60	0	6.87936
11461	0	47	1	0	18.0855	63	0	0	0	3662	9	16	43.9	1	9	67.1	1.73521	168	4.34448	29	0.32741	5.554	37.2052	1	1	93	5.16243	116.5	74.5	0	7.20675
13534	0	37	15.925	0	18.0868	66	0	0	0	2839	13	17	49.9	0	13	70.8	1.83089	164	4.24104	27	0.30483	5.4	35.522	1	1	91	5.05141	86.5	54	0	7.11355
2138	0	36	0	0	18.0874	61.5	0	0	0	2186	10	9	44.3	0	7	48.9	1.26455	174	4.49964	68	0.76772	5.4	35.522	1	1	83	4.60733	100	62	0	7.9452
13405	0	51	245	0	18.0876	65.5	0	0	0	1800	16	21	45.9	0	19	70.7	1.8283	217	5.61162	37	0.41773	5	31.15	3	3	97	5.38447	119	78	0	7.49248
736	0	58	36	0	18.0878	67	0	0	0	783	29	16	43.4	0	25	78	2.01708	229	5.92194	37	0.41773	5.6	37.708	1	1	95	5.27345	112.5	65.5	0	7.47165
17192	0	32	0	0	18.0885	62	0	0	0	754	9	16	44.7	0	10	63	1.62918	126	3.25836	20	0.2258	4.8	28.964	1	1	87	4.82937	101	63	0	6.76849
10587	0	53	0	0	18.0914	64	0	0	0	3998	11	14	38.3	0	11	92.6	2.39464	234	6.05124	66	0.74514	5.4	35.522	1	1	108	5.99508	120.5	79	0	8.17864
11881	1	45	12	0	18.0928	69.5	0	0	1	3234	24	23	48.9	0	13	64.3	1.6628	216	5.58576	76	0.85804	5.6	37.708	1	1	90	4.9959	97	59.5	0	8.1374
10244	0	41	1	0	18.0928	66	0	0	0	394	11	13	47.6	0	7	47	1.21542	167	4.31862	39	0.44031	5.146	32.7458	1	1	100	5.551	108	63.5	0	7.57558
5505	1	37	0	0	18.093	69.5	0	0	1	4385	10	11	55.6	0	13	42.1	1.08871	196	5.06856	99	1.11771	4.9	30.057	1	3	91	5.05141	91.5	57.5	0	8.41283
16836	1	43	12	0	18.0941	66	0	0	1	1877	13	20	49.8	0	15	50	1.293	167	4.31862	40	0.4516	5.2	33.336	1	1	97	5.38447	112	68.5	0	7.57044
7704	0	31	0	0	18.0951	67.8	0	0	0	3719	9	17	47.9	0	6	82.9	2.14379	179	4.62894	65	0.73385	4.8	28.964	1	2	85	4.71835	80.5	48.5	0	7.92389
15833	1	37	18	0	18.0961	74	0	0	1	2205	14	17	57.4	0	16	57	1.47402	166	4.29276	47	0.53063	5.1	32.243	1	3	88	4.88488	105	70.5	0	7.63434
6416	0	36	18	0	18.0966	67.3	0	0	0	4237	14	15	47.2	0	11	64.8	1.67573	181	4.68066	28	0.31612	5	31.15	1	1	90	4.9959	105	66	0	7.13887
20467	0	35	0	0	18.0969	69	0	0	0	385	12	14	52.3	0	9	60	1.5516	174	4.49964	28	0.31612	5.2	33.336	1	1	86	4.77386	97	53.5	0	7.0934
2850	1	41	84	0	18.0982	66	0	0	1	4408	17	15	46.1	0	20	56.2	1.45333	185	4.7841	20	0.2258	4.9	30.057	2	3	88	4.88488	91	55.5	0	6.77992
3841	0	44	12	0	18.0986	64.2	0	0	0	3277	8	13	48.5	1	12	56.9	1.47143	169	4.37034	57	0.64353	5.2	33.336	1	1	87	4.82937	109	65	0	7.81581
3142	0	43	87.5	0	18.0996	62.5	0	0	0	930	32	23	44.5	0	19	75.2	1.94467	233	6.02538	54	0.60966	5.1	32.243	2	2	88	4.88488	99	63	0	7.77317
5299	0	45	0	0	18.1001	63	0	0	0	2301	11	19	39.7	0	12	68	1.75848	159	4.11174	42	0.47418	5.1	32.243	1	1	88	4.88488	106	69	0	7.52186
14009	0	23	0	0	18.1007	64	0	0	0	735	10	17	49.1	1	9	63.2	1.63435	132	3.41352	21	0.23709	4.9	30.057	1	1	86	4.77386	121.5	73.5	0	6.80572
13944	1	40	84	0	18.105	65	0	0	1	2808	11	15	54.5	0	13	56	1.44816	182	4.70652	42	0.47418	5	31.15	2	1	79	4.38529	92.5	56	0	7.41397
3087	0	60	0	0	18.1055	68.5	0	0	0	3772	23	24	45.6	0	14	84.9	2.19551	196	5.06856	68	0.76772	5.146	32.7458	1	1	93	5.16243	126.5	79.5	0	8.05896
13476	0	41	11	0	18.108	65	0	0	0	385	12	20	42.5	0	11	68.7	1.77658	169	4.37034	35	0.39515	4.8	28.964	1	1	93	5.16243	94.5	57.5	0	7.3948
3834	0	38	0	0	18.1086	65	0	0	0	727	25	17	46.3	0	12	54.5	1.40937	164	4.24104	133	1.50157	5.2	33.336	1	1	87	4.82937	113.5	74	0	8.66311
17742	0	40	0	0	18.1086	65	0	0	0	1017	25	22	49.9	0	15	113	2.92218	219	5.66334	25	0.28225	5.3	34.429	1	1	90	4.9959	111.5	60.5	0	7.02554
8801	1	63	154	0	18.1103	72.5	0	0	1	4438	25	35	45.9	0	28	45.5	1.17663	221	5.71506	83	0.93707	4.5	25.685	3	2	89	4.94039	108.5	66.5	0	8.21433
14689	1	34	0	0	18.1105	73.5	0	0	1	2561	21	16	55.4	0	22	47.2	1.22059	186	4.80996	84	0.94836	5.2	33.336	1	3	89	4.94039	114.5	75.5	0	8.22631
5201	0	56	0	0	18.1105	64	0	0	0	1093	10	17	44.3	0	10	57.1	1.47661	196	5.06856	64	0.72256	5.5	36.615	1	1	95	5.27345	139	85	0	8.01961
11344	1	28	1	0	18.1108	63.6	0	0	1	3680	21	18	56.1	0	18	37.7	0.974922	170	4.3962	75	0.84675	4.432	24.9418	1	3	87	4.82937	128	76.5	0	8.09025
7692	0	36	0	0	18.1113	73.5	0	0	0	3575	12	19	51.3	1	8	78.5	2.03001	199	5.14614	44	0.49676	5.35	34.9755	1	1	81	4.49631	98	60.5	0	7.48549
6669	0	40	126	0	18.1115	58.8	0	0	0	3892	20	16	44.7	0	10	73.6	1.9033	224	5.79264	27	0.30483	5	31.15	2	1	84	4.66284	95.5	62.5	0	7.03351
17198	0	43	2.8	0	18.114	62	0	0	0	1812	28	24	43.8	0	16	66	1.70676	170	4.3962	51	0.57579	5.1	32.243	1	1	85	4.71835	86	55.5	0	7.68133
1620	0	46	84	0	18.1148	66.6	0	0	0	4367	22	16	48.9	0	16	60.5	1.56453	194	5.01684	77	0.86933	5.1	32.243	2	1	87	4.82937	107	65.5	0	8.11657
13798	1	33	252	0	18.1159	72	0	0	1	2933	21	21	49.5	0	29	54.2	1.40161	203	5.24958	80	0.9032	4.9	30.057	3	2	105	5.82855	129.5	79	0	8.34284
4544	0	36	0	0	18.1174	59.5	0	0	0	4661	13	13	42.8	0	13	89.3	2.3093	233	6.02538	45	0.50805	4.8	28.964	1	1	92	5.10692	82	46	0	7.6353
17345	0	38	0	0	18.119	72	0	0	0	1315	15	19	47.2	0	15	55	1.4223	152	3.93072	27	0.30483	5.6	37.708	1	1	90	4.9959	104	58.5	0	7.1025
16367	1	49	1	0	18.1205	67	0	0	1	357	14	20	50.9	0	18	46	1.18956	180	4.6548	68	0.76772	5.2	33.336	1	3	86	4.77386	95.5	62.5	0	7.98071
9108	0	21	0	0	18.1209	60.8	0	0	0	763	15	16	46.1	1	12	56.1	1.45075	163	4.21518	34	0.38386	5.4	35.522	1	1	78	4.32978	111.5	65.5	0	7.18992
677	1	79	1	0	18.1223	71	0	0	1	1092	11	18	46.8	1	10	34.5	0.89217	153	3.95658	46	0.51934	6.2	44.266	1	1	84	4.66284	125	71	1	7.56631
15413	0	44	0	0	18.1225	69	0	0	0	2195	13	17	50.3	0	13	99.7	2.57824	167	4.31862	47	0.53063	5	31.15	1	1	94	5.21794	123	71	0	7.7003
3437	1	36	54	0	18.1234	70	0	0	1	2189	18	17	59.9	0	13	44	1.13784	180	4.6548	42	0.47418	5.1	32.243	1	3	91	5.05141	111.5	77	0	7.55538
13382	1	40	34	0	18.1258	63	0	0	1	2673	15	22	54.5	0	12	65.5	1.69383	177	4.57722	20	0.2258	5.2	33.336	1	1	90	4.9959	105.5	69	0	6.80239
20825	0	25	0	0	18.1279	66	0	0	0	343	8	10	39.6	0	13	88	2.27568	215	5.5599	19	0.21451	5.4	35.522	1	1	92	5.10692	99.5	59	0	6.77308
12227	1	42	1	0	18.1279	65.5	0	0	1	1842	16	16	55.2	0	17	53	1.37058	181	4.68066	54	0.60966	5	31.15	1	3	96	5.32896	121	77.5	0	7.86019
18323	1	36	252	0	18.1285	65	0	0	1	1494	11	11	52.7	0	27	65	1.6809	201	5.19786	70	0.7903	5.1	32.243	3	1	96	5.32896	125	80	0	8.1197
20500	0	34	1	0	18.1308	68	0	0	0	364	5	11	47.7	0	12	75	1.9395	169	4.37034	45	0.50805	5.1	32.243	1	1	91	5.05141	114.5	72	0	7.62437
10264	0	27	1	0	18.1312	59.8	0	0	0	1771	20	18	43	0	9	68.9	1.78175	157	4.06002	17	0.19193	4.6	26.778	1	1	79	4.38529	98.5	68.5	0	6.50951
16743	0	57	1	0	18.1317	63	0	0	0	717	10	22	42.5	0	12	57	1.47402	200	5.172	59	0.66611	5.5	36.615	1	3	85	4.71835	99	64.5	0	7.82704
16960	0	35	1	0	18.1354	66	0	0	0	1867	32	26	41.9	0	14	53	1.37058	158	4.08588	34	0.38386	5.1	32.243	1	1	83	4.60733	88	55.5	0	7.25205
17772	0	52	0	0	18.1359	72	0	0	0	273	8	12	48.6	0	13	70	1.8102	250	6.465	57	0.64353	5.5	36.615	1	1	94	5.21794	117	67	0	7.8932
8313	0	37	1	0	18.1373	69.5	0	0	0	1879	21	20	43.8	0	14	82	2.12052	190	4.9134	35	0.39515	5.1	32.243	1	1	93	5.16243	98.5	65	0	7.3948
385	0	51	0	0	18.1385	62	0	0	0	4389	19	24	46.9	1	28	70	1.8102	280	7.2408	173	1.95317	5.2	33.336	1	1	89	4.94039	109	68.5	0	8.94878
1215	0	48	0	0	18.1391	63	0	0	0	3621	9	18	44.2	1	7	81.3	2.10242	242	6.25812	57	0.64353	4.9	30.057	1	1	78	4.32978	96.5	59	0	7.70661
7823	0	36	0	0	18.1392	62	0	0	0	2464	15	14	45.8	0	14	65.5	1.69383	288	7.44768	71	0.80159	4.9	30.057	1	1	82	4.55182	89	58	0	7.97625
19300	0	35	0	0	18.1392	65	0	0	0	699	11	10	45.8	0	16	71	1.83606	186	4.80996	34	0.38386	5.2	33.336	1	1	83	4.60733	104.5	64	0	7.25205
7152	1	31	0	0	18.1403	68.8	0	0	1	1091	17	12	56	0	15	52	1.34472	173	4.47378	46	0.51934	4.8	28.964	1	3	102	5.66202	93	60	0	7.76047
20034	0	31	0	0	18.1414	66	0	0	0	732	13	8	46.5	0	9	68	1.75848	188	4.86168	36	0.40644	4.9	30.057	1	1	77	4.27427	102	65.5	0	7.23418
6074	0	43	52.5	0	18.1414	61.2	0	0	0	4387	19	17	48.2	0	12	48	1.24128	162	4.18932	73	0.82417	5	31.15	1	1	86	4.77386	111	70.5	0	8.05166
15737	1	36	1	0	18.1416	66	0	0	1	2037	13	25	56.9	0	18	70	1.8102	185	4.7841	40	0.4516	5	31.15	1	1	83	4.60733	112	64	0	7.41457
12856	0	32	1	0	18.1425	58.5	0	0	0	3195	11	18	43.7	0	9	57.7	1.49212	172	4.44792	49	0.55321	4.7	27.871	1	1	84	4.66284	89.5	56.5	0	7.62949
7367	0	50	1	0	18.1446	62.4	0	0	0	384	18	15	44.1	0	13	102.1	2.64031	224	5.79264	62	0.69998	4.8	28.964	1	2	84	4.66284	85	50.5	0	7.8648
16718	0	39	0	0	18.1449	66.5	0	0	0	1852	12	18	50	0	14	58	1.49988	193	4.99098	21	0.23709	5.4	35.522	1	1	84	4.66284	98	57	0	6.78219
7556	0	41	1	0	18.1451	61.5	0	0	0	3850	14	12	49.4	0	10	61.1	1.58005	166	4.29276	50	0.5645	4.5	25.685	1	1	86	4.77386	99.5	67.5	0	7.67322
8712	0	39	0	0	18.1461	64.3	0	0	0	3274	11	16	45.3	0	9	56.5	1.46109	217	5.61162	31	0.34999	5.044	31.6309	1	1	87	4.82937	92.5	58.5	0	7.20675
8135	0	47	0	0	18.1464	57.8	0	0	0	4561	9	14	47.8	0	10	82.3	2.12828	217	5.61162	66	0.74514	4.8	28.964	1	1	88	4.88488	92	60.5	0	7.97384
10820	0	46	0	0	18.1477	65	0	0	0	728	14	25	46.4	1	10	71.5	1.84899	194	5.01684	37	0.41773	5.35	34.9755	1	1	84	4.66284	110.5	66.5	0	7.34859
14353	0	45	0	0	18.1478	58	0	0	0	2557	8	15	43.6	0	13	72.1	1.86451	197	5.09442	49	0.55321	5	31.15	1	1	89	4.94039	105.5	62	0	7.68731
1703	0	45	1	0	18.148	66.5	0	0	0	1666	13	18	47.1	0	11	72.9	1.88519	170	4.3962	61	0.68869	5.4	35.522	1	1	86	4.77386	100	63	0	7.87207
12094	0	41	0	0	18.1498	65	0	0	0	1777	10	15	46	0	9	79.2	2.04811	166	4.29276	12	0.13548	5.4	35.522	1	1	84	4.66284	98	63.5	0	6.22258
3921	0	40	12	0	18.1512	65.4	0	0	0	2606	15	17	45.6	0	11	76.9	1.98863	195	5.0427	37	0.41773	4.942	30.5161	1	1	83	4.60733	104.5	68.5	0	7.33661
10548	0	39	1	0	18.1519	66.5	0	0	0	3774	15	19	49	0	10	65.2	1.68607	181	4.68066	56	0.63224	5.146	32.7458	1	1	99	5.49549	98	68	0	7.92732
2547	0	37	0	0	18.152	57.9	0	0	0	4534	8	12	44.8	0	11	60.4	1.56194	142	3.67212	27	0.30483	5.2	33.336	1	1	82	4.55182	84.5	53	0	7.00941
4127	0	47	1	0	18.1532	66	0	0	0	3286	10	14	47.7	0	8	54.4	1.40678	162	4.18932	36	0.40644	5.146	32.7458	1	1	89	4.94039	97	64	0	7.37901
19680	0	38	0	0	18.1546	60	0	0	0	692	9	10	47	0	8	76	1.96536	171	4.42206	36	0.40644	5.3	34.429	1	1	99	5.49549	111	67.5	0	7.48549
2870	1	40	216	0	18.1551	73	0	0	1	3666	16	10	55.6	0	14	41.7	1.07836	205	5.3013	67	0.75643	4.9	30.057	3	3	100	5.551	108	69.5	0	8.11672
16505	0	30	1	0	18.1568	64	0	0	0	1981	13	24	48.3	1	11	58	1.49988	177	4.57722	49	0.55321	5.4	35.522	1	1	84	4.66284	122	77.5	0	7.62949
20186	0	35	1	0	18.1572	63	0	0	0	682	9	18	45.5	0	13	80	2.0688	201	5.19786	37	0.41773	5.3	34.429	1	1	84	4.66284	98.5	60	0	7.34859
15013	0	55	0	0	18.1577	66	0	0	0	1104	19	20	46.6	1	17	65.8	1.70159	293	7.57698	63	0.71127	5.8	39.894	1	1	91	5.05141	120	79.5	0	7.96085
6635	0	46	1	0	18.1578	57.8	0	0	0	1869	9	12	45.1	0	6	73.9	1.91105	225	5.8185	50	0.5645	4.8	28.964	1	3	90	4.9959	96.5	58	0	7.71869
3265	0	43	54	0	18.1581	66.2	0	0	0	4123	17	15	51.8	1	21	80.5	2.08173	177	4.57722	36	0.40644	4.8	28.964	1	1	85	4.71835	98.5	61.5	0	7.33302
15715	0	42	0	0	18.1593	67.5	0	0	0	777	20	21	50.1	0	15	55	1.4223	178	4.60308	34	0.38386	5.2	33.336	1	1	85	4.71835	84	54.5	0	7.27586
6295	0	51	27.3	0	18.1611	72	0	0	0	1237	15	22	46.9	1	10	73.9	1.91105	215	5.5599	52	0.58708	5.4	35.522	1	1	93	5.16243	117	72	0	7.7907
10366	0	41	0	0	18.1634	68.5	0	0	0	4039	11	14	44.6	0	10	57.2	1.47919	169	4.37034	25	0.28225	4.8	28.964	1	3	79	4.38529	90	53	0	6.89518
8464	0	40	0	0	18.1636	59	0	0	0	2962	13	10	45	0	7	76.1	1.96795	162	4.18932	80	0.9032	5	31.15	1	1	89	4.94039	98.5	58	0	8.17752
9094	0	44	1	0	18.1637	62	0	0	0	1686	8	10	48.2	0	6	81.6	2.11018	233	6.02538	45	0.50805	5.1	32.243	1	1	79	4.38529	102.5	64.5	0	7.48296
10514	1	41	252	0	18.1661	74.8	0	0	1	336	13	18	52.5	0	23	48.7	1.25938	203	5.24958	127	1.43383	5.146	32.7458	3	3	97	5.38447	109	72	0	8.72575
18877	0	35	1	0	18.1664	65.5	0	0	0	735	12	19	46.1	0	17	81	2.09466	206	5.32716	34	0.38386	5.2	33.336	1	1	94	5.21794	118.5	70.5	0	7.37651
13252	0	37	0	0	18.1666	68	0	0	0	3078	13	13	47.5	0	13	83.3	2.15414	195	5.0427	11	0.12419	4.8	28.964	1	1	92	5.10692	90	52	0	6.22654
10536	0	35	18	0	18.1675	64	0	0	0	2534	17	17	46.8	0	9	60	1.5516	162	4.18932	21	0.23709	5.1	32.243	1	1	88	4.88488	101	59.5	0	6.82871
18412	1	35	1	0	18.1677	68	0	0	1	1127	30	22	54.5	0	27	65	1.6809	146	3.77556	43	0.48547	5.4	35.522	1	2	83	4.60733	91	57.5	0	7.48689
9052	0	33	2.8	0	18.1681	68.4	0	0	0	4493	22	8	45.7	0	10	65.6	1.69642	159	4.11174	74	0.83546	4.5	25.685	1	1	80	4.4408	93.5	60	0	7.99294
12626	0	27	0	0	18.1683	59.9	0	0	0	2604	7	13	43.2	0	11	56.1	1.45075	119	3.07734	31	0.34999	5.1	32.243	1	1	83	4.60733	84	56	0	7.15968
18476	0	40	1	0	18.1683	62	0	0	0	1098	22	13	43.2	0	18	74	1.91364	150	3.879	58	0.65482	5.4	35.522	1	2	91	5.05141	119.5	63.5	0	7.87816
9829	1	52	81.3	0	18.1684	73.8	0	0	1	2563	12	17	57.5	0	14	34.5	0.89217	168	4.34448	69	0.77901	5	31.15	2	3	101	5.60651	112.5	72.5	0	8.15608
7385	0	37	206.5	0	18.169	56.5	0	0	0	392	18	11	44.5	0	10	112	2.89632	244	6.30984	35	0.39515	4.8	28.964	3	2	81	4.49631	91	53	0	7.25665
282	0	34	4.2	0	18.1694	62.5	0	0	0	2770	12	10	44.9	0	14	49.8	1.28783	164	4.24104	47	0.53063	5.2	33.336	1	3	87	4.82937	126	84	0	7.62291
17370	1	37	262.5	0	18.1712	66	0	0	1	1477	22	31	56.8	0	17	79	2.04294	175	4.5255	27	0.30483	5	31.15	3	1	90	4.9959	114	73	0	7.1025
14583	1	36	1	0	18.1712	67.5	0	0	1	2415	24	18	56.8	0	21	55.2	1.42747	174	4.49964	39	0.44031	5.5	36.615	1	1	99	5.49549	96.5	60	0	7.56553
12395	1	31	0	0	18.1725	70.5	0	0	1	1463	16	15	54.2	0	12	37.6	0.972336	154	3.98244	127	1.43383	4.9	30.057	1	3	95	5.27345	111.5	73	0	8.70492
14902	0	42	66	0	18.174	67.5	0	0	0	2191	13	15	46.7	0	10	61.8	1.59815	166	4.29276	60	0.6774	5	31.15	1	1	91	5.05141	100	67.5	0	7.91206
19250	0	47	2.2	0	18.1742	64	0	0	0	1069	7	9	49.9	0	11	72	1.86192	164	4.24104	41	0.46289	5.3	34.429	1	1	92	5.10692	99	59	0	7.54221
5512	1	51	350	0	18.1742	71	0	0	1	3940	8	15	52.4	0	30	55.2	1.42747	150	3.879	42	0.47418	4.7	27.871	4	3	83	4.60733	108.5	69.5	0	7.46336
20056	1	38	0	0	18.1754	71	0	0	1	733	13	17	56.3	0	28	61	1.57746	241	6.23226	95	1.07255	5.4	35.522	1	2	82	4.55182	113.5	79	0	8.26745
8114	0	54	23	0	18.1775	62	0	0	0	2203	15	15	48	0	10	55.7	1.4404	200	5.172	66	0.74514	5.1	32.243	1	1	86	4.77386	131.5	75.5	0	7.95085
4271	0	43	0	0	18.1791	68	0	0	0	4333	11	12	48.3	0	6	68.9	1.78175	210	5.4306	43	0.48547	5	31.15	1	1	93	5.16243	101.5	62.5	0	7.60065
1692	1	49	318.5	0	18.1793	68.5	0	0	1	4569	36	32	52.6	0	322	60.2	1.55677	165	4.2669	37	0.41773	4.5	25.685	4	3	93	5.16243	121.5	77.5	1	7.45037
11806	1	36	154	0	18.1801	73.2	0	0	1	3605	18	18	59.1	0	16	49.3	1.2749	208	5.37888	48	0.54192	4.942	30.5161	3	3	93	5.16243	94	58	0	7.71065
20471	0	50	90	0	18.1802	70	0	0	0	371	10	14	44.3	1	8	69	1.78434	214	5.53404	59	0.66611	5.3	34.429	2	1	97	5.38447	121.5	76	0	7.9591
18032	0	40	36	0	18.1802	64	0	0	0	1442	9	9	45.5	1	10	64	1.65504	169	4.37034	60	0.6774	5.2	33.336	1	1	100	5.551	98.5	60	0	8.00637
6825	0	30	12	0	18.1803	69	0	0	0	4320	18	11	48.6	0	10	49.6	1.28266	164	4.24104	32	0.36128	4.8	28.964	1	1	82	4.55182	108.5	65	0	7.17931
3481	0	39	0	0	18.1809	64.6	0	0	0	4345	12	11	45.1	1	8	62.9	1.62659	190	4.9134	50	0.5645	5.2	33.336	1	1	85	4.71835	93	63	0	7.66153
10874	1	36	154	0	18.1811	66	0	0	1	3119	17	19	48.9	1	19	75.8	1.96019	192	4.96512	47	0.53063	5.35	34.9755	3	1	87	4.82937	112.5	67	0	7.62291
16526	1	35	1	0	18.1813	73	0	0	1	1784	11	18	57.8	0	11	56	1.44816	171	4.42206	28	0.31612	5.1	32.243	1	2	92	5.10692	105	60	0	7.16085
13413	0	34	0	0	18.1839	65.5	0	0	0	364	8	15	42.4	0	11	53.7	1.38868	152	3.93072	30	0.3387	5	31.15	1	3	93	5.16243	108	64.5	0	7.24065
19099	0	28	0	0	18.1841	60	0	0	0	1065	8	8	40.1	0	10	82	2.12052	193	4.99098	28	0.31612	5.2	33.336	1	1	82	4.55182	101	57.5	0	7.04578
18830	0	50	222.95	0	18.1868	62	0	0	0	1091	11	16	46.5	0	17	118	3.05148	217	5.61162	36	0.40644	5.4	35.522	3	2	94	5.21794	116	74.5	0	7.43367
9911	0	36	0	0	18.187	67.5	0	0	0	3988	14	15	56.4	0	10	57.5	1.48695	160	4.1376	21	0.23709	4.9	30.057	1	1	86	4.77386	97	49	0	6.80572
19779	1	37	54	0	18.1873	67	0	0	1	761	27	26	58.6	0	25	67	1.73262	176	4.55136	48	0.54192	5.4	35.522	1	2	93	5.16243	90	50	0	7.71065
18110	1	39	7.43167	0	18.1878	71	0	0	1	1470	11	9	55.7	0	19	69	1.78434	213	5.50818	131	1.47899	5.2	33.336	1	1	95	5.27345	125	84	0	8.73593
13948	0	19	1	0	18.1887	61.5	0	0	0	2296	10	19	42.3	0	11	57.8	1.49471	181	4.68066	34	0.38386	5.2	33.336	1	1	82	4.55182	85.5	50.5	0	7.23993
1415	0	50	0	0	18.1887	69.2	0	0	0	3269	10	16	50	0	10	60.1	1.55419	170	4.3962	30	0.3387	4.7	27.871	1	1	91	5.05141	112.5	55	0	7.21891
14751	1	35	84	0	18.1888	71	0	0	1	2301	20	23	57.5	0	25	61	1.57746	207	5.35302	142	1.60318	5.2	33.336	2	3	91	5.05141	128.5	83.5	0	8.77354
18550	0	28	1	0	18.1889	64	0	0	0	280	18	16	49.1	1	16	69	1.78434	138	3.56868	28	0.31612	5.2	33.336	1	1	88	4.88488	91	63	0	7.11639
5732	1	37	252	0	18.1891	65.4	0	0	1	1460	10	16	49.7	0	10	60	1.5516	149	3.85314	41	0.46289	5.2	33.336	3	3	92	5.10692	85.5	52.5	0	7.54221
6587	0	47	1	0	18.1893	65.7	0	0	0	3956	12	12	46.1	0	13	71.4	1.8464	181	4.68066	42	0.47418	4.7	27.871	1	1	80	4.4408	93.5	63.5	0	7.42655
1524	0	50	1	0	18.1894	64	0	0	0	4384	16	17	43.7	0	9	58	1.49988	182	4.70652	48	0.54192	5.5	36.615	1	1	88	4.88488	97.5	59.5	0	7.65539
1506	0	44	0	0	18.191	68	0	0	0	3596	9	14	45.7	0	10	49.8	1.28783	132	3.41352	30	0.3387	5.044	31.6309	1	1	86	4.77386	103.5	66	0	7.1624
4315	0	43	18.2	0	18.1912	60.6	0	0	0	2577	20	20	44.1	1	11	83	2.14638	216	5.58576	49	0.55321	5.1	32.243	1	1	80	4.4408	100.5	62	0	7.5807
9698	0	30	0	0	18.1933	61.5	0	0	0	1074	12	12	42.2	0	8	61.7	1.59556	158	4.08588	30	0.3387	4.8	28.964	1	1	103	5.71753	123	77.5	0	7.34278
20608	1	39	1	0	18.1949	69.5	0	0	1	375	35	23	61.4	0	16	55	1.4223	202	5.22372	35	0.39515	5.4	35.522	1	1	97	5.38447	132.5	69.5	0	7.43691
9721	0	36	0	0	18.1958	64.2	0	0	0	4035	16	15	47.4	0	29	75.3	1.94726	197	5.09442	37	0.41773	5.1	32.243	1	1	90	4.9959	89.5	56.5	0	7.41758
11033	0	34	1	0	18.1958	67.5	0	0	0	369	13	15	47.4	1	9	58.3	1.50764	127	3.28422	25	0.28225	5.248	33.8606	1	1	87	4.82937	111.5	61.5	0	6.99164
7117	0	35	0	0	18.1965	69.5	0	0	0	3569	11	19	49.3	0	10	55.4	1.43264	163	4.21518	61	0.68869	5.1	32.243	1	1	86	4.77386	97.5	60	0	7.87207
5575	0	52	22	0	18.1965	64.7	0	0	0	4270	12	19	49.6	0	10	71.2	1.84123	234	6.05124	55	0.62095	5.1	32.243	1	1	79	4.38529	109	70.5	0	7.68363
13486	0	42	0	0	18.1967	69	0	0	0	2917	13	17	46.7	0	16	59	1.52574	168	4.34448	45	0.50805	5.2	33.336	1	1	88	4.88488	125	77.5	0	7.59085
8168	0	41	145.2	0	18.1977	66	0	0	0	1015	13	13	51.3	0	7	59.9	1.54901	147	3.80142	33	0.37257	5.6	37.708	3	3	84	4.66284	95	62.5	0	7.23418
4770	0	49	120	0	18.1995	70	0	0	0	2177	12	19	46.3	0	18	95.2	2.46187	200	5.172	34	0.38386	5.1	32.243	2	1	84	4.66284	132	79	0	7.26403
16216	1	51	1	0	18.2025	67.5	0	0	1	1968	12	22	47.3	1	19	58	1.49988	169	4.37034	32	0.36128	5.1	32.243	1	3	87	4.82937	120.5	73.5	0	7.2385
10470	0	42	0	0	18.2035	63	0	0	0	3810	15	17	44.3	0	8	46.7	1.20766	164	4.24104	64	0.72256	5	31.15	1	1	86	4.77386	98	63	0	7.92008
8798	1	36	0	0	18.2049	77.7	0	0	1	4471	9	13	60.7	1	11	39.2	1.01371	191	4.93926	52	0.58708	5	31.15	1	3	85	4.71835	98	63.5	0	7.70075
5056	1	35	0	0	18.2049	72	0	0	1	1829	12	14	58.2	0	15	54.2	1.40161	126	3.25836	27	0.30483	4.738	28.2863	1	2	87	4.82937	98.5	64	0	7.0686
18666	1	35	90	0	18.206	71	0	0	1	1099	19	19	54.3	0	17	58	1.49988	177	4.57722	59	0.66611	5.1	32.243	2	1	98	5.43998	123	71	0	7.96936
19957	1	39	4.2	0	18.2065	69	0	0	1	734	13	16	53.3	0	15	43	1.11198	141	3.64626	46	0.51934	5	31.15	1	1	101	5.60651	106.5	67.5	0	7.75061
12326	0	32	0	0	18.2087	70	0	0	0	1458	10	16	50.6	0	8	70.7	1.8283	174	4.49964	23	0.25967	5.5	36.615	1	1	83	4.60733	100	61	0	6.86119
5843	0	34	0	0	18.2099	53	0	0	0	4501	11	15	45	1	6	56	1.44816	138	3.56868	29	0.32741	5	31.15	1	1	88	4.88488	93	46.5	0	7.15149
3954	0	47	0	0	18.2104	60.5	0	0	0	3945	14	12	43.3	0	10	69.2	1.78951	215	5.5599	67	0.75643	4.5	25.685	1	1	99	5.49549	92.5	59	0	8.10667
13231	0	40	0	0	18.2105	71	0	0	0	2732	17	22	48.8	0	13	69.8	1.80503	213	5.50818	56	0.63224	5.2	33.336	1	1	94	5.21794	97	62	0	7.8755
1909	0	39	12	0	18.2112	63.5	0	0	0	4608	14	13	49.4	0	13	84.2	2.17741	207	5.35302	35	0.39515	5.5	36.615	1	1	81	4.49631	105	67	0	7.25665
19493	0	43	0	0	18.2129	68	0	0	0	748	18	14	46.8	1	11	78	2.01708	161	4.16346	45	0.50805	5.3	34.429	1	1	87	4.82937	94.5	58.5	0	7.57942
14011	0	37	0	0	18.2138	64	0	0	0	735	16	18	41.2	0	15	69.2	1.78951	155	4.0083	44	0.49676	4.7	27.871	1	1	88	4.88488	117.5	68	0	7.56838
15739	1	30	84	0	18.2146	68	0	0	1	2184	15	18	57	0	23	40	1.0344	165	4.2669	46	0.51934	5.1	32.243	2	3	97	5.38447	112	69.5	0	7.71021
3678	0	44	2.8	0	18.2152	64	0	0	0	2995	11	20	45.3	0	13	75.7	1.9576	222	5.74092	61	0.68869	5.2	33.336	1	1	101	5.60651	117.5	72.5	0	8.03285
18750	1	52	0	0	18.2158	66	0	0	1	840	16	13	47.1	0	15	71	1.83606	150	3.879	47	0.53063	5.5	36.615	1	1	100	5.551	81.5	53.5	0	7.76217
20540	0	56	0	0	18.217	70	0	0	0	424	11	18	42.7	0	13	68	1.75848	229	5.92194	47	0.53063	5.2	33.336	1	1	98	5.43998	114.5	69.5	0	7.74197
12656	1	35	1	0	18.2184	61.5	0	0	1	3022	19	19	47.4	0	12	44.9	1.16111	126	3.25836	65	0.73385	5.1	32.243	1	2	92	5.10692	97.5	63.5	0	8.00303
10769	0	34	12	0	18.2184	66	0	0	0	3794	11	12	47.4	0	7	77.3	1.99898	181	4.68066	48	0.54192	5.146	32.7458	1	1	80	4.4408	112.5	68.5	0	7.56008
10478	1	53	0	0	18.2194	68.5	0	0	1	4028	23	23	51.3	0	42	64.1	1.65763	197	5.09442	79	0.89191	5	31.15	1	1	89	4.94039	103.5	64	0	8.16494
3221	0	44	0	0	18.2201	66	0	0	0	4023	11	13	45.6	0	11	63.4	1.63952	245	6.3357	72	0.81288	5.1	32.243	1	1	89	4.94039	98.5	60.5	0	8.07216
13488	0	42	0	0	18.2212	69.5	0	0	0	2919	6	19	44.4	0	11	68.3	1.76624	201	5.19786	42	0.47418	5.2	33.336	1	1	82	4.55182	93.5	60	0	7.45124
7241	0	52	0	0	18.2216	58	0	0	0	2556	11	16	44.8	0	9	59.7	1.54384	220	5.6892	66	0.74514	5	31.15	1	1	91	5.05141	107	73.5	0	8.00737
8688	0	40	0	0	18.2219	63.8	0	0	0	4534	7	14	42.6	0	12	64.2	1.66021	172	4.44792	40	0.4516	4.9	30.057	1	1	84	4.66284	91.5	58	0	7.42655
3658	0	39	90	0	18.222	65.4	0	0	0	3659	20	23	42.1	0	15	79.2	2.04811	185	4.7841	56	0.63224	4.7	27.871	2	3	93	5.16243	105.5	65	0	7.8648
6266	0	41	1	0	18.2225	70	0	0	0	994	9	13	47	0	9	81.1	2.09725	166	4.29276	18	0.20322	4.7	27.871	1	3	76	4.21876	88	54.5	0	6.52796
13451	1	37	308	0	18.2232	67	0	0	1	2591	20	20	56	0	24	65.5	1.69383	127	3.28422	50	0.5645	4.9	30.057	4	3	93	5.16243	113.5	75	0	7.75148
5789	1	35	110	0	18.2238	70.4	0	0	1	4403	17	21	56.9	0	15	37.5	0.96975	200	5.172	90	1.0161	4.7	27.871	2	1	95	5.27345	107.5	72	0	8.36054
7161	0	42	2.8	0	18.2257	60.2	0	0	0	4040	7	10	49.8	1	8	55.4	1.43264	146	3.77556	33	0.37257	5.2	33.336	1	1	87	4.82937	95	58	0	7.26927
14301	0	54	0	0	18.226	66.5	0	0	0	2555	14	20	49.5	0	16	54.4	1.40678	181	4.68066	60	0.6774	5.6	37.708	1	1	85	4.71835	123	78	0	7.84385
12946	0	35	1	0	18.2272	62.8	0	0	0	2962	16	19	45.1	0	9	67.3	1.74038	173	4.47378	32	0.36128	5	31.15	1	1	85	4.71835	96.5	63	0	7.21524
16561	0	43	18	0	18.2274	70.5	0	0	0	1798	16	28	44.7	1	23	54	1.39644	205	5.3013	67	0.75643	5.1	32.243	1	1	86	4.77386	92.5	63	0	7.96589
10964	1	41	12	0	18.2278	70.6	0	0	1	1888	14	17	53.3	0	11	43.6	1.1275	228	5.89608	95	1.07255	5.044	31.6309	1	1	91	5.05141	114	73	0	8.37159
430	1	59	242.9	0	18.2279	67.5	0	0	1	1127	16	29	53.8	0	28	60.4	1.56194	210	5.4306	101	1.14029	5	31.15	3	3	82	4.55182	96	66	0	8.32869
14269	1	36	308	0	18.2279	70.5	0	0	1	730	24	25	53.8	0	53	58.2	1.50505	200	5.172	68	0.76772	5	31.15	4	3	95	5.27345	111	71	0	8.08024
15446	0	43	0	0	18.2291	63	0	0	0	755	18	18	46.9	1	11	72	1.86192	190	4.9134	40	0.4516	5.4	35.522	1	2	79	4.38529	89.5	54	0	7.36518
11878	0	35	1	0	18.2304	62.8	0	0	0	3244	11	14	40.8	0	15	58.9	1.52315	193	4.99098	89	1.00481	4.9	30.057	1	1	84	4.66284	108.5	66	0	8.22631
9449	0	36	60	0	18.2308	59	0	0	0	3601	13	11	48.2	1	13	71.5	1.84899	186	4.80996	63	0.71127	4.9	30.057	1	1	78	4.32978	110	74	0	7.8067
16952	0	39	0	0	18.2308	70	0	0	0	1820	18	24	51.7	0	10	126	3.25836	250	6.465	35	0.39515	4.8	28.964	1	1	82	4.55182	89	61	0	7.26892
19206	0	59	0	0	18.232	70	0	0	0	1084	12	15	48.5	0	13	76	1.96536	195	5.0427	38	0.42902	5.5	36.615	1	1	91	5.05141	154.5	97	0	7.4553
333	1	39	252	0	18.2323	72.3	0	0	1	1744	15	16	55.2	0	24	60.3	1.55936	130	3.3618	66	0.74514	4.7	27.871	3	3	91	5.05141	114.5	75.5	0	8.00737
6622	0	24	0	0	18.2324	56.9	0	0	0	2885	21	19	46.5	0	10	79.1	2.04553	186	4.80996	33	0.37257	5.4	35.522	1	1	80	4.4408	94.5	60.5	0	7.18539
7768	0	46	36	0	18.2331	61.8	0	0	0	4016	21	22	44.6	0	10	63.1	1.63177	186	4.80996	27	0.30483	4.9	30.057	1	1	78	4.32978	89.5	56	0	6.9594
5760	0	47	0	0	18.2359	64.5	0	0	0	1929	12	20	42.8	0	12	58	1.49988	214	5.53404	58	0.65482	5.4	35.522	1	1	83	4.60733	116	77	0	7.78614
16079	0	39	53	0	18.2362	70.5	0	0	0	492	10	16	47.8	0	11	66	1.70676	151	3.90486	45	0.50805	4.9	30.057	1	1	82	4.55182	100.5	63	0	7.52023
8396	1	48	336	0	18.2364	71.8	0	0	1	2026	18	21	53.7	0	14	80.2	2.07397	168	4.34448	42	0.47418	4.9	30.057	4	2	104	5.77304	123.5	75	0	7.68891
3652	1	46	18	0	18.2375	72	0	0	1	3292	13	18	58.5	0	8	48.4	1.25162	185	4.7841	95	1.07255	4.84	29.4012	1	3	98	5.43998	83.5	52.5	0	8.4457
4182	0	42	84	0	18.2383	71.3	0	0	0	3639	20	20	50.5	0	10	53	1.37058	179	4.62894	42	0.47418	4.942	30.5161	2	2	65	3.60815	83	49	0	7.21891
17009	0	38	0	0	18.2384	68	0	0	0	1060	17	18	45.3	0	13	61	1.57746	186	4.80996	49	0.55321	5	31.15	1	1	85	4.71835	85	44	0	7.64132
4309	0	47	0	0	18.2385	61	0	0	0	1101	12	15	47.1	0	12	103	2.66358	192	4.96512	25	0.28225	5.2	33.336	1	1	82	4.55182	105.5	66	0	6.93245
7880	0	30	18	0	18.2389	67.2	0	0	0	4388	9	16	51.6	0	10	75.4	1.94984	195	5.0427	24	0.27096	5	31.15	1	1	93	5.16243	102.5	67.5	0	7.01751
13960	0	22	0	0	18.2396	68	0	0	0	2597	10	16	54.4	0	11	47.5	1.22835	172	4.44792	33	0.37257	5	31.15	1	1	74	4.10774	98.5	59.5	0	7.10743
1986	0	64	0	0	18.2408	60	0	0	0	1974	10	15	42.7	0	8	64.3	1.6628	221	5.71506	107	1.20803	5.2	33.336	1	1	99	5.49549	99	68	0	8.5748
6744	0	43	0	0	18.241	63	0	0	0	4331	16	15	47.4	0	25	71.9	1.85933	208	5.37888	31	0.34999	5.1	32.243	1	1	80	4.4408	99.5	64.5	0	7.12287
14531	0	37	0	0	18.241	74	0	0	0	725	9	17	47.4	0	12	45.9	1.18697	119	3.07734	64	0.72256	5.1	32.243	1	1	84	4.66284	96	58.5	0	7.89655
17459	0	49	0	0	18.2418	68	0	0	0	1512	24	32	43.6	0	9	79	2.04294	205	5.3013	23	0.25967	5	31.15	1	1	91	5.05141	116	67.5	0	6.95321
11169	0	33	1	0	18.2422	64	0	0	0	3562	8	13	46.7	0	9	53.9	1.39385	141	3.64626	31	0.34999	5.248	33.8606	1	1	90	4.9959	99	58	0	7.24065
3844	0	42	54	0	18.2431	60.2	0	0	0	4387	12	14	47.7	0	9	60.1	1.55419	169	4.37034	39	0.44031	5.6	37.708	1	1	101	5.60651	102.5	64	0	7.58553
13724	0	39	0	0	18.2431	66.5	0	0	0	2900	12	13	47.7	1	12	66.2	1.71193	222	5.74092	29	0.32741	4.9	30.057	1	1	81	4.49631	110	72.5	0	7.0686
16442	0	44	1	0	18.2452	64	0	0	0	1816	10	20	47	0	10	69	1.78434	173	4.47378	33	0.37257	5	31.15	1	1	89	4.94039	100	66	0	7.292
17833	1	35	1	0	18.2468	68	0	0	1	373	19	13	52.3	0	14	55	1.4223	169	4.37034	64	0.72256	5.7	38.801	1	3	100	5.551	104.5	67	0	8.07091
18914	1	30	0	0	18.247	68	0	0	1	1099	8	8	58.4	0	8	68	1.75848	162	4.18932	59	0.66611	5.1	32.243	1	1	104	5.77304	131	84	0	8.02878
17904	0	44	0	0	18.2471	67	0	0	0	366	24	20	43.5	0	23	65	1.6809	158	4.08588	37	0.41773	5.4	35.522	1	2	99	5.49549	96.5	65.5	0	7.51289
7402	0	50	84	0	18.2476	67.4	0	0	0	388	17	15	45.9	0	11	87.3	2.25758	189	4.88754	53	0.59837	4.9	30.057	2	2	78	4.32978	91.5	61	0	7.63385
12720	0	51	0	0	18.2476	68.2	0	0	0	1093	12	17	45.9	0	8	54.8	1.41713	189	4.88754	56	0.63224	5.5	36.615	1	1	99	5.49549	111	67.5	0	7.92732
10689	1	35	0	0	18.2477	64.5	0	0	1	3674	15	14	49.8	0	13	62.3	1.61108	197	5.09442	38	0.42902	4.738	28.2863	1	2	93	5.16243	109	69	0	7.47704
8615	1	35	126	0	18.2481	66.2	0	0	1	4370	15	19	49.2	0	20	54.2	1.40161	176	4.55136	87	0.98223	4.9	30.057	2	3	97	5.38447	123	76.5	0	8.34747
10343	1	41	0	0	18.25	66	0	0	1	1833	11	14	55	1	10	66.3	1.71452	209	5.40474	49	0.55321	5.1	32.243	1	1	82	4.55182	99.5	63	0	7.60539
13746	0	63	0	0	18.2507	68.5	0	0	0	1763	19	23	42.5	1	16	54.9	1.41971	241	6.23226	108	1.21932	5.6	37.708	1	1	102	5.66202	102.5	66	0	8.61396
5077	0	48	0	0	18.2524	62	0	0	0	3489	9	13	43.4	0	11	53.5	1.38351	179	4.62894	19	0.21451	5.4	35.522	1	1	91	5.05141	116.5	65	0	6.76215
9232	1	39	36	0	18.2525	65.6	0	0	1	4374	14	13	50.6	0	17	57.9	1.49729	201	5.19786	89	1.00481	4.6	26.778	1	2	83	4.60733	109.5	69.5	0	8.21433
403	1	58	0	0	18.2531	70	0	0	1	4275	18	25	54	0	12	59.8	1.54643	223	5.76678	51	0.57579	5.6	37.708	1	3	92	5.10692	91	64.5	0	7.76047
10649	0	35	12	0	18.2546	63	0	0	0	3290	5	19	43.8	0	12	52.5	1.35765	138	3.56868	23	0.25967	5.1	32.243	1	3	96	5.32896	103	63	0	7.0067
19408	1	26	36	0	18.2549	65	0	0	1	1059	20	26	51.4	0	18	72	1.86192	171	4.42206	46	0.51934	4.9	30.057	1	1	102	5.66202	93.5	51	0	7.76047
7903	1	48	392	0	18.2549	70	0	0	1	3003	18	31	51.4	0	43	51	1.31886	163	4.21518	60	0.6774	5.1	32.243	4	3	82	4.55182	106.5	75.5	0	7.80792
17478	0	40	1	0	18.2553	63	0	0	0	1697	14	17	41.9	0	12	81	2.09466	199	5.14614	37	0.41773	5.2	33.336	1	1	83	4.60733	112.5	67	0	7.33661
12465	0	44	1	0	18.2556	64.5	0	0	0	2922	12	16	42.4	0	11	52.9	1.36799	185	4.7841	39	0.44031	5.4	35.522	1	1	83	4.60733	101.5	58	0	7.38926
2814	1	40	1	0	18.257	66.6	0	0	1	4360	29	22	54.2	0	12	54.8	1.41713	192	4.96512	79	0.89191	4.8	28.964	1	2	87	4.82937	109.5	65	0	8.14221
19579	0	40	0	0	18.258	70	0	0	0	735	23	16	41.3	0	11	88	2.27568	198	5.12028	39	0.44031	5	31.15	1	1	92	5.10692	119.5	69.5	0	7.4922
10783	0	33	24	0	18.2587	69.8	0	0	0	3589	11	14	47.8	0	7	78.9	2.04035	182	4.70652	46	0.51934	5.35	34.9755	1	1	89	4.94039	104	65.5	0	7.62413
12319	1	39	0	0	18.2602	68.5	0	0	1	343	16	16	52.4	0	11	56.4	1.4585	228	5.89608	75	0.84675	5.5	36.615	1	1	104	5.77304	101.5	65.5	0	8.26873
18576	0	30	1	0	18.2612	74	0	0	0	1099	13	14	47.1	0	23	94	2.43084	160	4.1376	13	0.14677	5	31.15	1	1	92	5.10692	99	57.5	0	6.39359
17741	0	45	90	0	18.2628	71	0	0	0	1376	8	9	49.6	0	12	77	1.99122	173	4.47378	55	0.62095	5.4	35.522	2	1	81	4.49631	111.5	62	0	7.70864
9433	0	40	154	0	18.2652	61.8	0	0	0	2720	26	24	42.2	0	11	74.1	1.91623	209	5.40474	37	0.41773	5	31.15	3	1	93	5.16243	100	66.5	0	7.45037
8692	0	46	1	0	18.2654	60	0	0	0	4338	12	13	43.6	1	8	70.5	1.82313	175	4.5255	32	0.36128	5.5	36.615	1	1	94	5.21794	86.5	56.5	0	7.31588
13131	0	36	0	0	18.2654	68	0	0	0	2534	23	19	43.6	0	16	73.4	1.89812	181	4.68066	26	0.29354	5.6	37.708	1	1	84	4.66284	123.5	75.5	0	6.99577
9408	0	25	0	0	18.2657	66	0	0	0	3574	13	14	47.7	1	7	72.7	1.88002	198	5.12028	27	0.30483	4.8	28.964	1	1	84	4.66284	99	57	0	7.03351
13202	1	35	1	0	18.2661	65.5	0	0	1	2954	17	16	53.1	0	13	46	1.18956	155	4.0083	65	0.73385	5	31.15	1	3	91	5.05141	107.5	63.5	0	7.9921
9597	1	63	385	0	18.2661	74.8	0	0	1	1331	18	14	53.1	0	22	46.6	1.20508	223	5.76678	55	0.62095	5.8	39.894	4	3	105	5.82855	112.5	70	1	7.96815
5123	1	36	36	0	18.2668	67.8	0	0	1	369	10	12	63.4	0	12	61.8	1.59815	215	5.5599	84	0.94836	5.1	32.243	1	3	95	5.27345	112	73	0	8.29155
6329	0	40	0	0	18.2682	61.4	0	0	0	3197	19	20	46.3	0	9	84.7	2.19034	192	4.96512	22	0.24838	4.8	28.964	1	1	75	4.16325	97.5	69	0	6.71538
14102	0	26	66	0	18.2699	65	0	0	0	1311	17	14	49.8	0	15	54.3	1.4042	163	4.21518	32	0.36128	4.7	27.871	1	3	81	4.49631	92	54.5	0	7.16704
14573	1	45	12	0	18.2716	72.5	0	0	1	464	17	20	59.2	1	14	44.4	1.14818	141	3.64626	56	0.63224	5.6	37.708	1	3	109	6.05059	105	64	1	8.02355
7620	0	41	0	0	18.2728	64.4	0	0	0	4368	14	16	50.9	0	18	66.5	1.71969	181	4.68066	46	0.51934	4.8	28.964	1	1	82	4.55182	106.5	67	0	7.54221
9023	1	34	4.2	0	18.2742	67.3	0	0	1	4441	22	14	55.2	0	12	36.5	0.94389	171	4.42206	90	1.0161	4.6	26.778	1	1	92	5.10692	112.5	74	0	8.32845
15405	0	44	0	0	18.2759	58	0	0	0	2279	16	18	39.6	0	14	73	1.88778	223	5.76678	36	0.40644	5.2	33.336	1	3	89	4.94039	112.5	69	0	7.37901
17439	0	38	1	0	18.2775	62	0	0	0	1113	12	15	48.8	1	11	93	2.40498	170	4.3962	47	0.53063	5.1	32.243	1	1	94	5.21794	116	70	0	7.7003
15	0	64	0	0	18.2785	65.5	0	0	0	360	21	25	42.9	0	17	75.3	1.94726	215	5.5599	60	0.6774	5.7	38.801	1	1	76	4.21876	102	62.5	0	7.73193
13917	0	42	0	0	18.2785	68	0	0	0	377	22	25	42.9	0	17	60.6	1.56712	188	4.86168	63	0.71127	5.1	32.243	1	1	86	4.77386	101.5	65	0	7.90433
9404	0	52	0	0	18.2786	70.5	0	0	0	3115	20	21	45.4	1	8	57.4	1.48436	191	4.93926	38	0.42902	5.2	33.336	1	1	92	5.10692	105	65	0	7.46623
10212	0	50	0	0	18.2786	71.8	0	0	0	331	9	17	45.4	0	10	61.8	1.59815	234	6.05124	66	0.74514	5	31.15	1	1	95	5.27345	121	77.5	0	8.05038
11060	1	36	12	0	18.2788	63.5	0	0	1	3655	38	27	51.1	1	17	43.1	1.11457	161	4.16346	96	1.08384	5.35	34.9755	1	3	102	5.66202	109	64.5	0	8.49617
7474	0	34	47	0	18.2799	64	0	0	0	225	8	13	44.6	0	9	82	2.12052	144	3.72384	40	0.4516	5	31.15	1	2	97	5.38447	122	78.5	0	7.57044
14351	0	45	1	0	18.2799	66.5	0	0	0	2555	25	22	44.6	0	24	74.9	1.93691	198	5.12028	36	0.40644	5.1	32.243	1	1	98	5.43998	132	78	0	7.47534
19277	0	29	1	0	18.281	64	0	0	0	1084	12	9	46.1	0	17	64	1.65504	189	4.88754	34	0.38386	5	31.15	1	1	91	5.05141	129.5	74	0	7.34407
5689	0	41	33	0	18.2815	63.3	0	0	0	4382	9	15	43.3	0	10	55.2	1.42747	174	4.49964	69	0.77901	5	31.15	1	1	86	4.77386	90.5	58.5	0	7.99531
249	0	60	0	0	18.2836	60	0	0	0	1073	22	20	42.8	0	11	84.7	2.19034	242	6.25812	75	0.84675	5.2	33.336	1	1	103	5.71753	114	64.5	0	8.25907
15421	0	38	0	0	18.285	67	0	0	0	2461	14	17	49.6	0	13	65.8	1.70159	183	4.73238	43	0.48547	5.6	37.708	1	3	83	4.60733	86.5	53.5	0	7.48689
3223	0	43	4.2	0	18.285	69.5	0	0	0	715	12	11	44.1	0	13	69.5	1.79727	185	4.7841	75	0.84675	5.2	33.336	1	1	84	4.66284	96	57.5	0	8.05516
10844	0	40	0	0	18.2856	71	0	0	0	3297	14	20	44.9	1	17	62.3	1.61108	271	7.00806	115	1.29835	5.8	39.894	1	1	88	4.88488	107	68.5	0	8.52912
13368	0	35	0	0	18.2857	58.5	0	0	0	3032	12	15	44.5	0	10	62.4	1.61366	140	3.6204	14	0.15806	4.9	30.057	1	1	85	4.71835	99	62	0	6.38856
9186	0	44	60	0	18.2894	64	0	0	0	1820	11	11	45.6	1	15	75.1	1.94209	192	4.96512	35	0.39515	4.9	30.057	1	1	93	5.16243	111.5	74.5	0	7.3948
9741	0	36	0	0	18.2894	68	0	0	0	3660	11	16	45.6	0	9	49.3	1.2749	187	4.83582	41	0.46289	4.9	30.057	1	1	79	4.38529	91	52.5	0	7.38987
13431	1	29	0	0	18.29	65	0	0	1	2821	17	18	50.4	0	14	45.4	1.17404	145	3.7497	23	0.25967	5.1	32.243	1	2	95	5.27345	102	64.5	0	6.99622
2778	1	40	154	0	18.29	69	0	0	1	3654	18	25	50.4	0	26	66.2	1.71193	199	5.14614	129	1.45641	5.146	32.7458	3	3	91	5.05141	116	78.5	0	8.67752
12441	0	34	0	0	18.2906	62.2	0	0	0	3290	17	18	44	0	12	55.8	1.44299	154	3.98244	29	0.32741	4.9	30.057	1	1	84	4.66284	109	67.5	0	7.10497
10040	0	40	1	0	18.2906	62.7	0	0	0	3937	12	17	44	0	13	52	1.34472	167	4.31862	26	0.29354	4.942	30.5161	1	1	94	5.21794	114	70.5	0	7.10824
15842	0	44	1	0	18.2915	68.5	0	0	0	2129	16	17	40.5	0	12	65	1.6809	209	5.40474	54	0.60966	5	31.15	1	1	91	5.05141	122.5	76.5	0	7.8067
17314	0	41	1	0	18.2932	67.5	0	0	0	1434	13	16	47.3	0	12	59	1.52574	173	4.47378	49	0.55321	5	31.15	1	1	91	5.05141	87	56.5	0	7.70953
4552	1	56	200	0	18.2964	69	0	0	1	3274	22	24	50.6	0	16	49.2	1.27231	192	4.96512	66	0.74514	5	31.15	3	2	91	5.05141	113	77.5	0	8.00737
3290	0	56	0	0	18.2964	65	0	0	0	368	17	19	50.6	1	11	77.4	2.00156	191	4.93926	82	0.92578	5.4	35.522	1	1	98	5.43998	104.5	69	0	8.29854
7778	0	41	0	0	18.2972	65.5	0	0	0	1428	9	16	44.3	0	9	76.6	1.98088	200	5.172	40	0.4516	4.9	30.057	1	1	98	5.43998	116	75	0	7.5807
14083	1	60	270	0	18.2983	77	0	0	1	1754	25	41	52.2	0	73	71.3	1.84382	204	5.27544	82	0.92578	5.5	36.615	3	3	99	5.49549	137.5	87	0	8.30869
14384	1	35	1	0	18.2983	67	0	0	1	2555	14	21	55.4	0	16	87.4	2.26016	236	6.10296	59	0.66611	5.4	35.522	1	1	90	4.9959	100.5	67.5	0	7.8842
4609	0	42	1	0	18.2992	64.9	0	0	0	4376	9	12	48.5	0	9	61	1.57746	171	4.42206	55	0.62095	5	31.15	1	1	94	5.21794	99.5	51.5	0	7.85748
1183	0	37	1	0	18.2998	74.5	0	0	0	1870	15	16	48.8	0	15	64.4	1.66538	197	5.09442	36	0.40644	4.432	24.9418	1	1	85	4.71835	100	60.5	0	7.33302
454	0	53	0	0	18.2999	64.6	0	0	0	2616	12	17	43.4	0	10	57.6	1.48954	173	4.47378	51	0.57579	4.7	27.871	1	1	82	4.55182	115	67.5	0	7.6454
3195	0	39	0	0	18.3	72.3	0	0	0	3270	17	20	47.2	0	16	64.7	1.67314	207	5.35302	37	0.41773	4.8	28.964	1	1	86	4.77386	98.5	63	0	7.37212
19278	1	43	0	0	18.3004	68	0	0	1	1085	11	10	53.7	0	9	62	1.60332	174	4.49964	33	0.37257	5.2	33.336	1	2	88	4.88488	114	75	0	7.2807
3202	0	42	0	0	18.3018	60.8	0	0	0	3403	12	15	43.8	0	8	67	1.73262	182	4.70652	33	0.37257	5.4	35.522	1	1	83	4.60733	89.5	48.5	0	7.2222
3388	0	34	1	0	18.3018	63.3	0	0	0	3534	6	16	45.4	0	9	70.8	1.83089	179	4.62894	19	0.21451	4.4	24.592	1	1	79	4.38529	126	74.5	0	6.62074
9682	0	55	1	0	18.3024	63	0	0	0	1457	20	20	42.9	0	9	119.4	3.08768	252	6.51672	24	0.27096	5.2	33.336	1	1	82	4.55182	90.5	55.5	0	6.89163
5438	0	33	0	0	18.3064	64.5	0	0	0	3990	14	14	45.7	0	8	64.4	1.66538	143	3.69798	33	0.37257	4.9	30.057	1	1	83	4.60733	93.5	60.5	0	7.2222
12872	1	31	108	0	18.3066	69.7	0	0	1	218	11	13	56	0	12	41.9	1.08353	139	3.59454	34	0.38386	5.7	38.801	2	3	95	5.27345	111	67	0	7.38709
16383	0	38	4.2	0	18.3072	70	0	0	0	1925	18	27	48.7	0	14	60	1.5516	203	5.24958	92	1.03868	5.6	37.708	1	3	92	5.10692	101.5	57.5	0	8.35043
992	0	50	36	0	18.3085	75	0	0	0	2896	13	23	42.3	0	13	63.7	1.64728	236	6.10296	25	0.28225	5.4	35.522	1	1	92	5.10692	119	76	0	7.04752
2920	0	46	4.2	0	18.3091	65	0	0	0	4047	11	19	44.5	0	11	79.8	2.06363	227	5.87022	28	0.31612	5.2	33.336	1	1	99	5.49549	118.5	78	0	7.23418
19353	0	49	0	0	18.3091	65	0	0	0	344	11	12	44.5	0	10	75	1.9395	210	5.4306	45	0.50805	5.3	34.429	1	1	94	5.21794	112.5	66	0	7.65681
17823	0	35	12	0	18.3108	69	0	0	0	1485	10	8	46.7	0	11	65	1.6809	153	3.95658	35	0.39515	5.4	35.522	1	1	88	4.88488	104.5	64	0	7.33954
19812	0	41	60	0	18.3121	64	0	0	0	364	23	19	50.4	1	19	79	2.04294	190	4.9134	50	0.5645	5.4	35.522	1	1	98	5.43998	106	60	0	7.80384
7276	0	35	1	0	18.3125	59.8	0	0	0	4395	9	13	48	0	8	83.7	2.16448	178	4.60308	34	0.38386	5.4	35.522	1	1	87	4.82937	95.5	65.5	0	7.29912
13339	1	36	126	0	18.3133	66	0	0	1	2865	14	17	55	0	21	61.8	1.59815	182	4.70652	72	0.81288	5.4	35.522	2	3	92	5.10692	105	68	0	8.10531
3056	1	39	5.13333	0	18.3134	67.3	0	0	1	2825	20	16	53.3	0	17	49.2	1.27231	234	6.05124	112	1.26448	5.7	38.801	1	3	93	5.16243	104.5	62	0	8.55795
17887	1	34	5.13333	0	18.3144	67	0	0	1	1092	17	12	61.4	0	21	60	1.5516	210	5.4306	118	1.33222	5.2	33.336	1	1	102	5.66202	129.5	83.5	0	8.70251
3442	0	37	1	0	18.3149	57	0	0	0	2134	5	9	44.8	0	8	69.1	1.78693	189	4.88754	36	0.40644	4.9	30.057	1	1	86	4.77386	102.5	62.5	0	7.34472
16834	0	33	126	0	18.3149	62	0	0	0	1664	11	19	44.8	0	12	68	1.75848	183	4.73238	31	0.34999	5	31.15	2	3	80	4.4408	106.5	69	0	7.12287
7125	0	43	36	0	18.3149	64	0	0	0	732	11	16	44.8	1	9	73.9	1.91105	246	6.36156	42	0.47418	5.8	39.894	1	1	90	4.9959	114.5	52.5	0	7.54433
17182	0	55	1	0	18.315	71	0	0	0	1745	20	27	44.4	0	13	105	2.7153	246	6.36156	49	0.55321	5.2	33.336	1	1	97	5.38447	98	63.5	0	7.77338
15780	0	57	1	0	18.3161	64	0	0	0	1118	16	26	40.5	0	15	88	2.27568	209	5.40474	24	0.27096	5.8	39.894	1	1	99	5.49549	105	60	0	7.08003
12375	1	34	252	0	18.3175	67.7	0	0	1	2296	18	18	53	0	13	75.4	1.94984	226	5.84436	71	0.80159	4.8	28.964	3	3	83	4.60733	100.5	61	0	7.98837
13950	0	25	0	0	18.3189	66	0	0	0	749	10	13	45.5	0	10	71.1	1.83865	187	4.83582	40	0.4516	5.1	32.243	1	3	89	4.94039	99.5	59.5	0	7.48437
18085	1	34	1	0	18.3203	66	0	0	1	1365	30	20	51.4	0	20	47	1.21542	170	4.3962	47	0.53063	5.1	32.243	1	2	92	5.10692	110.5	66	0	7.67879
16113	0	38	0	0	18.3208	69.5	0	0	0	2125	16	21	48.2	0	12	81	2.09466	226	5.84436	44	0.49676	5.2	33.336	1	1	88	4.88488	126	85	0	7.56838
5815	0	51	52.5	0	18.3208	57.6	0	0	0	2148	24	8	44.7	1	12	79.1	2.04553	216	5.58576	36	0.40644	5.6	37.708	1	1	100	5.551	98.5	61	0	7.49554
11052	0	45	1	0	18.3208	64.7	0	0	0	3837	9	13	44.7	0	16	87.9	2.27309	230	5.9478	53	0.59837	4.534	26.0566	1	1	88	4.88488	114.5	78	0	7.75448
16493	1	35	84	0	18.3217	67	0	0	1	745	23	25	53.7	0	20	50	1.293	174	4.49964	31	0.34999	5.1	32.243	2	3	88	4.88488	115.5	75	0	7.21818
5845	0	55	0	0	18.3227	64.5	0	0	0	4256	22	24	42.5	1	18	70.1	1.81279	199	5.14614	45	0.50805	5.5	36.615	1	1	87	4.82937	100	63.5	0	7.57942
9416	0	51	0	0	18.3266	66	0	0	0	654	20	22	47.8	0	12	86.3	2.23172	225	5.8185	153	1.72737	5.6	37.708	1	1	89	4.94039	103	65.5	0	8.82593
15468	0	58	0	0	18.3306	64	0	0	0	1470	20	23	46.4	0	17	98.6	2.5498	243	6.28398	44	0.49676	5.4	35.522	1	1	95	5.27345	155.5	97	0	7.64492
7282	0	40	12	0	18.3323	56	0	0	0	4395	11	11	44.9	0	11	57.4	1.48436	150	3.879	46	0.51934	5.7	38.801	1	1	99	5.49549	127.5	83	0	7.73061
18145	0	53	0	0	18.3373	67.5	0	0	0	1418	12	9	48.9	0	13	72	1.86192	243	6.28398	63	0.71127	5	31.15	1	1	80	4.4408	109.5	78	0	7.83201
13183	0	33	1	0	18.3383	61.2	0	0	0	1447	7	18	44.8	0	9	80.7	2.0869	208	5.37888	30	0.3387	5	31.15	1	1	84	4.66284	95	58.5	0	7.13887
7052	0	59	0	0	18.3383	64	0	0	0	729	14	15	44.8	1	11	55.1	1.42489	191	4.93926	39	0.44031	4.7	27.871	1	1	70	3.8857	94	58.5	0	7.21891
16874	0	47	0	0	18.3385	65.5	0	0	0	364	15	17	44.4	0	13	61	1.57746	170	4.3962	48	0.54192	5.1	32.243	1	1	86	4.77386	90	51.5	0	7.6324
19891	0	34	0.91	0	18.3388	69.5	0	0	0	625	12	14	47.3	1	14	52	1.34472	127	3.28422	29	0.32741	5.2	33.336	1	1	98	5.43998	95	55	0	7.25912
1857	0	52	0	0	18.3397	60.3	0	0	0	222	16	22	43.1	0	14	63.7	1.64728	174	4.49964	21	0.23709	4.7	27.871	1	1	84	4.66284	138	83	0	6.78219
20298	0	40	2.8	0	18.3422	68	0	0	0	496	10	10	45.5	1	12	64	1.65504	203	5.24958	66	0.74514	5.5	36.615	1	1	92	5.10692	97.5	66.5	0	8.0183
17764	0	37	54	0	18.3424	59	0	0	0	397	11	8	42.1	0	10	79	2.04294	175	4.5255	36	0.40644	4.9	30.057	1	3	84	4.66284	101.5	60.5	0	7.32119
16916	1	35	1	0	18.3432	71.5	0	0	1	1659	15	24	59.3	0	16	65	1.6809	164	4.24104	44	0.49676	5.1	32.243	1	2	84	4.66284	121	74.5	0	7.52186
18583	0	38	1	0	18.3432	64	0	0	0	1127	12	12	46.9	0	11	87	2.24982	157	4.06002	24	0.27096	5.4	35.522	1	1	98	5.43998	98.5	55.5	0	7.06987
13408	0	47	18	0	18.3432	66	0	0	0	2928	14	17	46.9	0	10	82.6	2.13604	197	5.09442	18	0.20322	5.5	36.615	1	1	91	5.05141	109	69	0	6.70808
7443	0	40	0	0	18.3436	56.7	0	0	0	331	30	21	43.9	0	12	42.8	1.10681	181	4.68066	73	0.82417	5.1	32.243	1	1	82	4.55182	96.5	60	0	8.00403
11247	0	47	0	0	18.3437	64.5	0	0	0	3264	16	17	46.2	0	13	79.7	2.06104	205	5.3013	48	0.54192	5.044	31.6309	1	1	88	4.88488	103	69.5	0	7.65539
1538	0	40	35	0	18.3443	64.5	0	0	0	1476	24	21	44.7	0	13	78.8	2.03777	198	5.12028	34	0.38386	5.8	39.894	1	1	94	5.21794	99	71.5	0	7.37651
18777	0	59	1	0	18.3443	66	0	0	0	1097	18	19	44.7	0	95	73	1.88778	231	5.97366	61	0.68869	5.3	34.429	1	1	92	5.10692	134.5	77	0	7.93952
3325	0	46	0	0	18.3443	67.2	0	0	0	2168	6	9	44.7	0	9	71.9	1.85933	186	4.80996	42	0.47418	5	31.15	1	1	79	4.38529	83	56	0	7.41397
11187	1	34	84	0	18.3449	64.1	0	0	1	1364	18	19	51.9	0	15	54.3	1.4042	180	4.6548	43	0.48547	4.432	24.9418	2	3	88	4.88488	123	75	0	7.54539
4831	0	62	0	0	18.3475	62	0	0	0	3347	13	15	43.4	0	8	62.1	1.60591	239	6.18054	119	1.34351	5.5	36.615	1	1	89	4.94039	109.5	65.5	0	8.57461
12997	0	34	0	0	18.3491	69.9	0	0	0	2485	9	15	54.6	0	9	38.8	1.00337	145	3.7497	54	0.60966	5.1	32.243	1	1	90	4.9959	101.5	65	0	7.79565
4746	0	38	0	0	18.3492	67.5	0	0	0	4396	16	13	43.8	0	8	53.2	1.37575	182	4.70652	17	0.19193	5.2	33.336	1	1	97	5.38447	127	74	0	6.71478
16222	0	34	18	0	18.3522	71	0	0	0	1853	10	19	49.3	0	12	70	1.8102	224	5.79264	11	0.12419	5.4	35.522	1	2	83	4.60733	105	73.5	0	6.12359
1384	0	44	1	0	18.3532	62	0	0	0	4364	11	15	51.8	0	10	80.4	2.07914	192	4.96512	51	0.57579	5.5	36.615	1	1	80	4.4408	99.5	62.5	0	7.62071
12555	0	34	1	0	18.3547	66	0	0	0	2942	7	11	47.4	0	10	55.8	1.44299	160	4.1376	39	0.44031	5.2	33.336	1	1	85	4.71835	96.5	55.5	0	7.41307
8629	1	41	308	0	18.355	73.5	0	0	1	4389	17	23	60	0	25	64.4	1.66538	177	4.57722	66	0.74514	5	31.15	4	2	96	5.32896	109.5	72.5	0	8.06086
18031	0	45	0	0	18.3567	69	0	0	0	1595	10	14	46.7	0	13	61	1.57746	128	3.31008	28	0.31612	5.2	33.336	1	1	81	4.49631	96.5	54	0	7.03351
7360	0	43	0	0	18.3568	58	0	0	0	1539	9	13	46	0	8	62.3	1.61108	131	3.38766	25	0.28225	4.8	28.964	1	1	85	4.71835	108.5	70.5	0	6.96838
2112	0	41	1	0	18.3608	60	0	0	0	4352	10	14	45.2	1	11	45.6	1.17922	157	4.06002	49	0.55321	5.6	37.708	1	1	82	4.55182	99.5	61	0	7.60539
15444	0	35	0	0	18.3608	65.5	0	0	0	1037	25	25	45.2	1	35	54.3	1.4042	176	4.55136	69	0.77901	5.1	32.243	1	1	88	4.88488	104	58	0	8.0183
16757	0	35	1	0	18.3617	67	0	0	0	1888	13	16	42.2	0	14	79	2.04294	199	5.14614	42	0.47418	5.4	35.522	1	1	95	5.27345	106.5	68	0	7.5984
10741	0	35	1	0	18.3621	62	0	0	0	3588	10	12	44.4	1	9	55.1	1.42489	146	3.77556	22	0.24838	5.35	34.9755	1	3	81	4.49631	97	63.5	0	6.79234
5146	0	36	1	0	18.365	67	0	0	0	3669	19	15	47.9	0	10	68	1.75848	167	4.31862	24	0.27096	5.248	33.8606	1	1	91	5.05141	90.5	55	0	6.99577
12796	0	33	0	0	18.3655	65.6	0	0	0	365	11	14	45.5	0	11	59.9	1.54901	165	4.2669	28	0.31612	4.9	30.057	1	3	90	4.9959	117	70	0	7.13887
13774	0	32	0	0	18.3661	67.5	0	0	0	910	21	26	48.2	1	13	66.2	1.71193	190	4.9134	39	0.44031	5.1	32.243	1	1	91	5.05141	106.5	67.5	0	7.48127
8677	0	48	0	0	18.3662	62.2	0	0	0	4054	14	13	46.9	0	12	73.1	1.89037	209	5.40474	113	1.27577	4.9	30.057	1	1	89	4.94039	97.5	57	0	8.52288
4997	0	52	0	0	18.3669	64.5	0	0	0	4176	13	15	46.2	1	10	53.2	1.37575	218	5.63748	37	0.41773	4.9	30.057	1	1	77	4.27427	105.5	67.5	0	7.26158
19992	0	40	84	0	18.3697	69	0	0	0	733	12	13	45.8	0	19	66	1.70676	199	5.14614	97	1.09513	5.2	33.336	2	1	91	5.05141	100	67	0	8.39242
20445	0	35	1	0	18.3697	70	0	0	0	399	11	14	45.8	0	11	74	1.91364	175	4.5255	44	0.49676	5.1	32.243	1	1	87	4.82937	96.5	64.5	0	7.55695
13204	0	58	36	0	18.3701	67.5	0	0	0	1813	17	19	46.5	1	16	78.3	2.02484	245	6.3357	33	0.37257	5.1	32.243	1	1	90	4.9959	111	71	0	7.30317
19967	1	47	1	0	18.372	70	0	0	1	378	12	13	58.8	0	28	61	1.57746	188	4.86168	36	0.40644	5.1	32.243	1	2	98	5.43998	125	78	0	7.47534
11296	1	36	0	0	18.3723	72.5	0	0	1	3163	40	25	54.1	0	21	61.8	1.59815	153	3.95658	13	0.14677	4.9	30.057	1	2	94	5.21794	115	74.5	0	6.4151
4752	1	44	36	0	18.3728	65.3	0	0	1	2204	14	12	59	0	14	42.8	1.10681	218	5.63748	130	1.4677	5.4	35.522	1	3	99	5.49549	106	69.5	0	8.76951
11880	0	43	18.2	0	18.3733	61.2	0	0	0	3275	12	13	49.9	0	9	64.7	1.67314	192	4.96512	33	0.37257	5.6	37.708	1	1	90	4.9959	107.5	70	0	7.30317
17442	0	33	0	0	18.3733	71	0	0	0	567	14	19	49.9	1	10	88	2.27568	234	6.05124	57	0.64353	5.4	35.522	1	1	84	4.66284	95.5	51.5	0	7.78072
18510	1	54	126	0	18.374	72	0	0	1	1090	15	14	61.6	0	19	72	1.86192	237	6.12882	65	0.73385	5.5	36.615	2	3	99	5.49549	105	66.5	0	8.07636
20216	0	48	12	0	18.3743	64	0	0	0	364	25	23	42.9	0	28	96	2.48256	175	4.5255	36	0.40644	5.6	37.708	1	1	105	5.82855	115	60.5	0	7.54433
14614	0	41	0	0	18.3747	65.5	0	0	0	2598	13	17	48.7	0	12	57	1.47402	170	4.3962	24	0.27096	5.1	32.243	1	1	81	4.49631	113.5	72	0	6.87936
20114	0	54	1	0	18.3755	62	0	0	0	735	11	13	41.4	0	13	80	2.0688	287	7.42182	113	1.27577	5.3	34.429	1	3	86	4.77386	124	66	0	8.48859
20153	0	24	1	0	18.376	64	0	0	0	266	6	9	42.4	0	12	75	1.9395	210	5.4306	61	0.68869	5.1	32.243	1	1	89	4.94039	116.5	73.5	0	7.90636
18063	1	27	114	0	18.3765	66	0	0	1	386	13	15	56.6	1	18	58	1.49988	136	3.51696	30	0.3387	5.2	33.336	2	3	85	4.71835	109.5	68	0	7.1507
15015	0	39	0	0	18.3768	64.5	0	0	0	2659	16	22	46.4	0	11	53.7	1.38868	218	5.63748	113	1.27577	5.2	33.336	1	1	90	4.9959	116	71.5	0	8.53405
20539	1	51	0	0	18.378	73	0	0	1	364	15	14	53.3	0	20	69	1.78434	233	6.02538	61	0.68869	5.4	35.522	1	2	90	4.9959	108	72	0	7.91754
9179	0	39	1	0	18.3793	61.8	0	0	0	2022	20	19	44.9	0	10	63.6	1.6447	175	4.5255	58	0.65482	5.1	32.243	1	1	84	4.66284	106	68.5	0	7.79811
6570	0	52	233.8	0	18.3795	58	0	0	0	4035	12	22	42.8	1	10	85.9	2.22137	206	5.32716	57	0.64353	4.9	30.057	3	2	78	4.32978	111	75	0	7.70661
11332	0	40	84	0	18.3798	69.5	0	0	0	288	17	19	46.7	0	13	64	1.65504	196	5.06856	41	0.46289	4.942	30.5161	2	1	81	4.49631	82	57.5	0	7.41487
6955	0	49	1	0	18.3798	59.8	0	0	0	3974	18	18	44.5	0	9	75.5	1.95243	252	6.51672	77	0.86933	5.4	35.522	1	1	96	5.32896	115.5	74	0	8.21501
14789	0	35	1	0	18.3799	68.5	0	0	0	2255	12	16	50.1	0	13	49.9	1.29041	147	3.80142	21	0.23709	5.2	33.336	1	1	91	5.05141	120.5	76.5	0	6.86223
20740	0	40	2.8	0	18.3818	72.5	0	0	0	371	7	12	49.5	0	9	56	1.44816	176	4.55136	47	0.53063	5.4	35.522	1	1	97	5.38447	103	63.5	0	7.73171
13165	0	42	126	0	18.3823	63	0	0	0	3212	11	19	47	0	8	74.4	1.92398	206	5.32716	21	0.23709	4.9	30.057	2	1	69	3.83019	93.5	62.5	0	6.58548
14860	0	40	252	0	18.3823	67	0	0	0	357	19	19	48.9	0	29	104.6	2.70496	213	5.50818	47	0.53063	4.8	28.964	3	1	91	5.05141	114	69.5	0	7.66786
11718	0	40	0	0	18.3842	68.7	0	0	0	3633	11	17	43.6	0	7	73.8	1.90847	166	4.29276	58	0.65482	5.248	33.8606	1	1	84	4.66284	116	69	0	7.79811
1121	0	48	12	0	18.3843	61.8	0	0	0	3645	16	24	45.2	0	21	119.6	3.09286	279	7.21494	67	0.75643	5	31.15	1	1	77	4.27427	98.5	54.5	0	7.85535
17508	0	36	1	0	18.3853	65	0	0	0	1470	11	22	52.2	0	8	55	1.4223	173	4.47378	30	0.3387	5.1	32.243	1	1	86	4.77386	105.5	59	0	7.1624
4973	0	43	55	0	18.3854	62.4	0	0	0	4729	11	12	44.8	0	11	57.5	1.48695	211	5.45646	59	0.66611	4.9	30.057	1	1	80	4.4408	94	55	0	7.76642
14604	0	43	0	0	18.3865	73	0	0	0	2561	13	16	45.9	0	12	64.7	1.67314	176	4.55136	24	0.27096	5	31.15	1	1	82	4.55182	121.5	74.5	0	6.89163
9058	0	42	1	0	18.3888	65.2	0	0	0	1229	9	19	48.2	0	8	54	1.39644	281	7.26666	145	1.63705	5.5	36.615	1	1	86	4.77386	97.5	62	0	8.73793
16681	0	46	0	0	18.3888	72	0	0	0	1982	16	27	45.5	1	13	69	1.78434	242	6.25812	42	0.47418	5.1	32.243	1	1	84	4.66284	107.5	59.5	0	7.47534
1970	0	58	0	0	18.3895	69	0	0	0	750	8	8	48.5	0	11	58.4	1.51022	188	4.86168	81	0.91449	5.5	36.615	1	1	91	5.05141	113.5	71.5	0	8.21216
20601	1	34	0	0	18.3895	68	0	0	1	472	11	15	58.2	0	11	103	2.66358	237	6.12882	21	0.23709	5.2	33.336	1	1	82	4.55182	115.5	63.5	0	6.75809
18673	0	33	24	0	18.3898	61	0	0	0	927	14	11	43.5	0	27	75	1.9395	196	5.06856	112	1.26448	4.9	30.057	1	1	89	4.94039	112.5	71	0	8.51399
19465	1	48	12	0	18.3908	68	0	0	1	1118	18	14	50.8	0	34	59	1.52574	203	5.24958	66	0.74514	5.2	33.336	1	1	103	5.71753	121	73	0	8.13124
10413	1	35	126	0	18.3946	72	0	0	1	2464	20	25	59.4	0	22		0	224	5.79264	69	0.77901	5.146	32.7458	2	3	94	5.21794	105	66.5	0	8.08425
18934	1	49	4.2	0	18.3949	73	0	0	1	339	19	10	52.6	0	14	86	2.22396	179	4.62894	23	0.25967	5.5	36.615	1	1	90	4.9959	97.5	61.5	0	6.94216
4038	0	44	0	0	18.3953	60.5	0	0	0	4234	11	12	43.4	0	7	53.8	1.39127	164	4.24104	81	0.91449	5.4	35.522	1	1	81	4.49631	101.5	60.5	0	8.09575
15743	0	51	0	0	18.3967	69.5	0	0	0	2316	16	19	45	0	16	91	2.35326	230	5.9478	41	0.46289	4.8	28.964	1	1	94	5.21794	98.5	64	0	7.56372
19773	1	51	0	0	18.3973	71	0	0	1	722	14	18	48.7	0	21	104	2.68944	264	6.82704	82	0.92578	5.4	35.522	1	2	101	5.60651	113	72	0	8.32869
149	0	42	0	0	18.3973	64	0	0	0	298	19	16	48.7	0	8	49	1.26714	251	6.49086	151	1.70479	4.5	25.685	1	3	75	4.16325	83.5	45.5	0	8.64162
2545	0	56	1	0	18.3984	70	0	0	0	2338	13	14	47.1	1	16	68.1	1.76107	298	7.70628	116	1.30964	6.2	44.266	1	1	102	5.66202	132.5	80.5	0	8.68542
15631	0	61	0	0	18.3984	78.5	0	0	0	357	18	21	47.1	1	13	66.2	1.71193	211	5.45646	28	0.31612	5	31.15	1	1	101	5.60651	100.5	62	0	7.25418
16142	0	39	60	0	18.3994	66	0	0	0	1798	13	18	45.7	0	13	70	1.8102	191	4.93926	25	0.28225	5	31.15	1	3	99	5.49549	82.5	51.5	0	7.12085
17661	0	33	126	0	18.3994	66	0	0	0	1478	6	10	45.7	0	13	96	2.48256	185	4.7841	27	0.30483	5.2	33.336	2	1	90	4.9959	115	65.5	0	7.1025
11111	0	44	0	0	18.4008	69	0	0	0	3709	10	14	43.3	0	11	96.7	2.50066	241	6.23226	89	1.00481	4.738	28.2863	1	1	93	5.16243	112	70	0	8.32809
17502	0	35	54	0	18.4042	71	0	0	0	1492	16	24	49.5	0	7	87	2.24982	215	5.5599	52	0.58708	5.2	33.336	1	1	83	4.60733	101.5	69	0	7.67694
13021	0	38	0	0	18.4047	68.7	0	0	0	434	9	13	48.6	0	10	71.9	1.85933	226	5.84436	17	0.19193	5.4	35.522	1	1	86	4.77386	104	64	0	6.59441
15516	0	45	0	0	18.4089	68	0	0	0	1484	11	15	44.8	0	11	40.6	1.04992	175	4.5255	65	0.73385	4.9	30.057	1	1	96	5.32896	100.5	60.5	0	8.04559
3343	0	36	0	0	18.4089	72.5	0	0	0	3930	43	41	44.8	0	40	65.2	1.68607	191	4.93926	42	0.47418	5.35	34.9755	1	1	100	5.551	115.5	75.5	0	7.64969
10567	1	43	0	0	18.4102	70.5	0	0	1	1460	16	17	55.1	0	17	25.1	0.649086	195	5.0427	77	0.86933	5.5	36.615	1	3	97	5.38447	102.5	75	0	8.22537
8725	0	44	33	0	18.4103	58	0	0	0	1800	7	8	42.2	0	8	44.7	1.15594	143	3.69798	57	0.64353	4.9	30.057	1	1	93	5.16243	108	64.5	0	7.8825
7769	0	30	1	0	18.4115	61	0	0	0	4366	11	17	48.2	1	8	69.4	1.79468	175	4.5255	38	0.42902	5.5	36.615	1	1	84	4.66284	117.5	70.5	0	7.37526
16883	0	38	154	0	18.4122	73	0	0	0	1771	13	19	48.5	0	13	77	1.99122	175	4.5255	50	0.5645	4.5	25.685	3	1	89	4.94039	111	61	0	7.70751
12475	0	36	0	0	18.4123	66.6	0	0	0	2894	12	17	49.1	0	11	55.6	1.43782	182	4.70652	70	0.7903	4.8	28.964	1	1	91	5.05141	116.5	73.5	0	8.06621
3825	0	43	4.2	0	18.4124	62.5	0	0	0	3624	13	17	48.8	0	16	63.9	1.65245	180	4.6548	32	0.36128	5.452	36.0904	1	1	98	5.43998	114.5	75	0	7.35756
15759	0	35	2.8	0	18.4149	59	0	0	0	1428	15	19	43.9	0	13	45	1.1637	193	4.99098	55	0.62095	5.2	33.336	1	1	91	5.05141	101.5	61	0	7.82505
16228	0	41	0	0	18.4188	68	0	0	0	2174	17	22	48.1	1	12	63	1.62918	165	4.2669	16	0.18064	5.1	32.243	1	3	86	4.77386	82	43	0	6.53379
9173	0	38	8.44667	0	18.4196	60.5	0	0	0	4354	10	12	49.3	0	10	64	1.65504	161	4.16346	43	0.48547	4.6	26.778	1	1	74	4.10774	98	64.5	0	7.37212
8504	0	39	1	0	18.4196	64.6	0	0	0	4351	13	14	49.3	0	10	72.7	1.88002	188	4.86168	62	0.69998	5.4	35.522	1	1	92	5.10692	107.5	65	0	7.95578
9523	0	35	0	0	18.4202	57	0	0	0	3637	8	9	45	0	12	50.6	1.30852	175	4.5255	50	0.5645	5.1	32.243	1	3	98	5.43998	107	60	0	7.80384
10479	0	49	0	0	18.4234	63	0	0	0	4028	15	14	40.3	1	10	60.3	1.55936	208	5.37888	64	0.72256	4.7	27.871	1	1	90	4.9959	99	55	0	7.96555
18930	0	38	191.1	0	18.4234	67	0	0	0	1181	13	10	47.4	0	13	65	1.6809	179	4.62894	47	0.53063	5.2	33.336	3	1	95	5.27345	91	54	0	7.71088
15106	0	40	1	0	18.4246	66.5	0	0	0	2540	15	14	51.2	0	12	55	1.4223	180	4.6548	38	0.42902	5.1	32.243	1	1	88	4.88488	98.5	62.5	0	7.42178
6665	0	25	9.99833	0	18.4248	58.8	0	0	0	3731	9	14	43.3	1	9	77.2	1.99639	182	4.70652	41	0.46289	4.6	26.778	1	1	82	4.55182	92.5	55	0	7.42714
2049	0	43	126	0	18.4249	56.9	0	0	0	4403	9	9	45.3	0	8	73.5	1.90071	194	5.01684	44	0.49676	5.1	32.243	2	1	91	5.05141	90.5	56	0	7.6019
10503	0	32	0	0	18.4249	61	0	0	0	727	16	14	47.7	0	10	62.4	1.61366	194	5.01684	31	0.34999	4.4	24.592	1	1	89	4.94039	104.5	65	0	7.22948
9972	0	35	1	0	18.4258	69.5	0	0	0	4061	12	14	49.8	0	7	54.6	1.41196	231	5.97366	67	0.75643	4.6	26.778	1	1	79	4.38529	95	60.5	0	7.88099
13266	0	38	12	0	18.427	67	0	0	0	2884	13	24	50.9	0	11	63.1	1.63177	164	4.24104	25	0.28225	5.6	37.708	1	1	84	4.66284	104	69	0	6.95655
13242	0	39	34	0	18.4278	68	0	0	0	3024	8	16	42.8	0	14	73	1.88778	162	4.18932	11	0.12419	5.2	33.336	1	1	85	4.71835	86	55	0	6.1474
5221	1	56	308	0	18.4285	74.2	0	0	1	377	8	16	54.9	0	26	45.8	1.18439	150	3.879	88	0.99352	4.6	26.778	4	3	104	5.77304	129.5	85.5	0	8.42858
15946	0	37	0	0	18.4292	74	0	0	0	342	10	15	50.6	0	11	91	2.35326	170	4.3962	44	0.49676	5.2	33.336	1	1	83	4.60733	99	58	0	7.50988
13622	0	34	1	0	18.4299	68.5	0	0	0	3004	10	15	46.3	0	15	65.6	1.69642	134	3.46524	46	0.51934	4.7	27.871	1	1	83	4.60733	109	69.5	0	7.55433
18334	1	55	110	0	18.4299	68	0	0	1	1143	15	19	56.7	1	60	87	2.24982	234	6.05124	54	0.60966	5.4	35.522	2	2	88	4.88488	119	81	0	7.77317
8912	0	40	1	0	18.4321	69	0	0	0	4264	5	13	47.6	0	9	47.8	1.23611	157	4.06002	37	0.41773	4.7	27.871	1	1	87	4.82937	87	55.5	0	7.38368
6121	1	29	0	0	18.4328	67	0	0	1	748	14	12	51.1	0	11	50.3	1.30076	160	4.1376	62	0.69998	5.1	32.243	1	3	91	5.05141	98.5	64.5	0	7.94485
2820	1	41	0	0	18.433	69.3	0	0	1	4382	12	9	58.6	1	13	31	0.80166	159	4.11174	88	0.99352	5	31.15	1	3	92	5.10692	114.5	61	0	8.30598
14974	0	39	12	0	18.4334	64	0	0	0	1819	17	18	47.9	0	12	47.7	1.23352	125	3.2325	23	0.25967	5.4	35.522	1	1	87	4.82937	112	62.5	0	6.90826
7194	1	46	385	0	18.4339	66	0	0	1	4389	39	37	52.4	0	51	73.3	1.89554	167	4.31862	101	1.14029	4.4	24.592	4	3	76	4.21876	127.5	83	0	8.25271
1532	1	58	54	0	18.4339	74.2	0	0	1	371	15	20	52.4	0	26	54.1	1.39903	147	3.80142	46	0.51934	5.1	32.243	1	1	106	5.88406	103	71	0	7.79893
7677	0	44	0	0	18.4344	66.7	0	0	0	4396	14	18	49.4	1	6	66	1.70676	196	5.06856	58	0.65482	4.9	30.057	1	1	90	4.9959	106.5	64	0	7.86711
12800	0	34	0	0	18.4349	58.3	0	0	0	1919	20	26	41.7	1	11	57.8	1.49471	153	3.95658	16	0.18064	5.1	32.243	1	1	84	4.66284	98	63	0	6.51026
19110	0	33	1	0	18.4351	64	0	0	0	729	10	11	48.8	0	8	45	1.1637	142	3.67212	34	0.38386	5.2	33.336	1	1	85	4.71835	90.5	46	0	7.27586
3533	0	36	0	0	18.4352	67	0	0	0	4382	18	11	50.8	0	13	52.4	1.35506	178	4.60308	27	0.30483	4.6	26.778	1	1	94	5.21794	101.5	64.5	0	7.14598
14233	1	60	66	0	18.4375	70	0	0	1	1805	14	16	52.1	0	14	55.3	1.43006	186	4.80996	69	0.77901	5.5	36.615	1	1	93	5.16243	111	73	0	8.07356
7463	1	38	116.9	0	18.4377	70.5	0	0	1	4375	9	13	54.8	0	13	55	1.4223	192	4.96512	63	0.71127	4.9	30.057	2	3	89	4.94039	119	79	0	7.93862
17892	0	36	0	0	18.4377	59	0	0	0	1389	6	8	43.5	0	6	79	2.04294	137	3.54282	18	0.20322	5.2	33.336	1	1	96	5.32896	98.5	65	0	6.76157
7998	1	49	0	0	18.4398	70	0	0	1	4033	26	21	55.7	1	15	69	1.78434	178	4.60308	83	0.93707	5.6	37.708	1	3	105	5.82855	128	86.5	0	8.37965
15490	0	35	154	0	18.4409	71	0	0	0	371	14	18	51.8	0	15	82	2.12052	189	4.88754	30	0.3387	4.9	30.057	3	3	87	4.82937	119	68	0	7.17396
12175	0	40	1	0	18.4421	65	0	0	0	1512	6	10	45.4	0	13	62	1.60332	133	3.43938	34	0.38386	5	31.15	1	1	93	5.16243	101.5	61	0	7.36581
11096	0	43	0	0	18.4433	66.5	0	0	0	2191	11	20	39.8	0	10	54.2	1.40161	186	4.80996	30	0.3387	4.942	30.5161	1	1	86	4.77386	102	63	0	7.1624
16785	0	52	156.6	0	18.444	70	0	0	0	1883	20	26	51.5	0	29	77	1.99122	209	5.40474	75	0.84675	5.2	33.336	3	2	98	5.43998	117.5	68.5	0	8.20931
1263	0	51	0	0	18.4473	62.2	0	0	0	2926	16	18	40.9	1	12	70.8	1.83089	196	5.06856	61	0.68869	5.4	35.522	1	1	75	4.16325	99.5	61	0	7.73521
19495	0	35	0	0	18.4485	65	0	0	0	1007	11	9	45.3	0	9	70	1.8102	214	5.53404	68	0.76772	5.3	34.429	1	1	85	4.71835	87	52	0	7.96901
12579	0	39	0	0	18.4488	58.7	0	0	0	3337	10	14	42.4	0	14	43	1.11198	167	4.31862	34	0.38386	5.1	32.243	1	1	88	4.88488	95	58	0	7.31055
6490	0	43	1	0	18.4492	66	0	0	0	4241	20	14	50.9	0	9	50.5	1.30593	140	3.6204	34	0.38386	4.5	25.685	1	1	91	5.05141	108	70	0	7.34407
11119	0	40	1	0	18.4499	67.5	0	0	0	2066	13	21	46	0	11	63	1.62918	151	3.90486	41	0.46289	5	31.15	1	1	84	4.66284	102.5	61	0	7.45124
9570	0	37	1	0	18.4501	60.8	0	0	0	2198	11	12	48.6	0	10	88.8	2.29637	194	5.01684	16	0.18064	5.2	33.336	1	1	78	4.32978	92	57	0	6.43615
10074	1	39	36	0	18.4502	69.5	0	0	1	3993	19	20	48.9	0	17	57.5	1.48695	226	5.84436	102	1.15158	5.1	32.243	1	3	83	4.60733	109	64	0	8.35067
1482	1	46	0	0	18.4546	70.2	0	0	1	4340	12	17	53.9	1	9	52.3	1.35248	205	5.3013	41	0.46289	4.9	30.057	1	1	93	5.16243	116	66.5	0	7.55302
15831	0	46	36	0	18.4548	67	0	0	0	2136	11	22	45.2	0	16	82	2.12052	236	6.10296	24	0.27096	5.6	37.708	1	1	92	5.10692	105	61	0	7.0067
16259	0	30	0	0	18.4548	67	0	0	0	1576	9	17	45.2	0	12	43	1.11198	172	4.44792	43	0.48547	5.2	33.336	1	1	83	4.60733	108	65	0	7.48689
14467	0	42	0	0	18.456	65	0	0	0	371	15	17	46.6	0	15	66	1.70676	199	5.14614	37	0.41773	5.3	34.429	1	1	83	4.60733	110	64	0	7.33661
13695	0	32	1	0	18.456	66	0	0	0	3051	9	13	46.6	0	11	47.7	1.23352	123	3.18078	51	0.57579	4.8	28.964	1	1	86	4.77386	102.5	61.5	0	7.69303
14717	1	30	399	0	18.4562	71	0	0	1	1426	23	18	57.3	0	19	70.2	1.81537	203	5.24958	124	1.39996	4.8	28.964	4	1	96	5.32896	104.5	64.5	0	8.69148
11506	0	32	0	0	18.4563	69.5	0	0	0	3633	17	15	47.9	0	10	58.4	1.51022	161	4.16346	16	0.18064	5.656	38.3201	1	1	81	4.49631	98.5	64.5	0	6.47389
15470	1	35	36	0	18.4563	66.5	0	0	1	1781	20	26	56.2	0	13	87.3	2.25758	195	5.0427	21	0.23709	5.4	35.522	1	1	83	4.60733	127	69.5	0	6.77022
11713	0	47	0	0	18.4569	68	0	0	0	3505	10	16	44	0	11	50.2	1.29817	175	4.5255	28	0.31612	5.6	37.708	1	1	97	5.38447	103.5	59	0	7.21377
18905	1	61	18	0	18.4574	67	0	0	1	1088	13	10	50.8	0	24	43	1.11198	208	5.37888	67	0.75643	5.5	36.615	1	3	97	5.38447	104	59.5	0	8.08626
14814	0	36	1	0	18.4577	67	0	0	0	2373	14	14	48.8	0	9	62.6	1.61884	213	5.50818	47	0.53063	5.4	35.522	1	1	87	4.82937	95.5	58.5	0	7.62291
1892	0	45	90	0	18.4582	70.5	0	0	0	721	12	17	54.1	0	9	85	2.1981	225	5.8185	89	1.00481	5.554	37.2052	2	1	88	4.88488	108	62	0	8.27283
14879	0	37	0	0	18.4595	64	0	0	0	2555	14	17	50.5	0	13	62.9	1.62659	243	6.28398	43	0.48547	5	31.15	1	1	88	4.88488	115	71.5	0	7.54539
840	0	51	0	0	18.4606	64	0	0	0	732	11	11	47.2	0	8	63.6	1.6447	189	4.88754	35	0.39515	4.6	26.778	1	1	95	5.27345	142.5	89	0	7.41608
10770	0	35	0	0	18.4606	65.5	0	0	0	2540	11	15	47.2	1	13	61	1.57746	165	4.2669	13	0.14677	4.8	28.964	1	1	84	4.66284	108	71	0	6.30262
570	1	63	54	0	18.4613	68	0	0	1	4116	14	20	50.2	1	9	52.2	1.34989	164	4.24104	25	0.28225	5	31.15	1	1	93	5.16243	107.5	70.5	0	7.05833
8387	0	38	0	0	18.4639	66	0	0	0	3654	18	22	49.6	1	13	65.2	1.68607	192	4.96512	48	0.54192	5.6	37.708	1	1	87	4.82937	96	63	0	7.64396
11401	0	36	0	0	18.4642	67.5	0	0	0	3647	11	14	57	0	8	73.6	1.9033	156	4.03416	35	0.39515	5.248	33.8606	1	1	89	4.94039	94	65	0	7.35084
3732	1	50	22	0	18.4643	64	0	0	1	2968	18	21	52.3	0	16	72.2	1.86709	211	5.45646	40	0.4516	5	31.15	1	1	93	5.16243	108	70	0	7.52833
14182	0	47	0	0	18.4645	61	0	0	0	1565	15	19	39.9	0	15	68.8	1.77917	172	4.44792	28	0.31612	4.9	30.057	1	1	81	4.49631	108	67	0	7.03351
12594	0	55	0	0	18.4651	64.2	0	0	0	699	15	20	48.4	0	11	57.8	1.49471	186	4.80996	34	0.38386	5.7	38.801	1	1	87	4.82937	95	56.5	0	7.29912
20944	0	64	0	0	18.4656	72	0	0	0	299	22	22	45.4	0	19	105	2.7153	233	6.02538	74	0.83546	5.8	39.894	1	1	99	5.49549	101	62	0	8.20604
17943	0	47	1	0	18.4676	67	0	0	0	1569	17	20	47.1	0	15	82	2.12052	247	6.38742	68	0.76772	5.4	35.522	1	1	85	4.71835	92	61	0	7.96901
17467	0	59	0	0	18.4685	70	0	0	0	1463	19	19	43.8	0	16	70	1.8102	176	4.55136	50	0.5645	5.7	38.801	1	3	91	5.05141	133	82	0	7.72974
7774	0	28	0	0	18.4689	64	0	0	0	4193	14	15	51.2	0	7	51.3	1.32662	180	4.6548	56	0.63224	4.8	28.964	1	1	81	4.49631	88	57	0	7.72665
15814	0	35	0	0	18.4691	67	0	0	0	2108	11	20	41.5	0	13	64	1.65504	151	3.90486	18	0.20322	5.1	32.243	1	1	91	5.05141	118.5	68.5	0	6.70808
10983	0	40	1	0	18.4691	65.5	0	0	0	727	9	12	42	0	13	55.1	1.42489	162	4.18932	57	0.64353	5.044	31.6309	1	1	89	4.94039	90	62.5	0	7.83854
13512	1	43	132	0	18.4702	70	0	0	1	1254	18	21	57.8	0	14	71.7	1.85416	172	4.44792	56	0.63224	5.1	32.243	2	1	87	4.82937	88.5	56	0	7.79811
10098	0	33	1	0	18.4725	70.5	0	0	0	4066	22	14	49.2	0	9	36.1	0.933546	138	3.56868	13	0.14677	4.8	28.964	1	1	89	4.94039	97.5	63	0	6.36044
12071	0	36	0	0	18.4737	65.3	0	0	0	3227	6	15	44.9	0	8	50.2	1.29817	186	4.80996	34	0.38386	5.4	35.522	1	1	88	4.88488	100.5	63	0	7.31055
2990	0	40	12	0	18.4737	67	0	0	0	3311	10	8	44.9	0	12	60.7	1.5697	202	5.22372	46	0.51934	4.6	26.778	1	1	86	4.77386	94.5	61	0	7.58984
10933	0	36	45.3	0	18.4765	63	0	0	0	573	28	17	46.3	0	11	36.8	0.951648	137	3.54282	29	0.32741	4.738	28.2863	1	1	76	4.21876	97.5	57.5	0	7.00488
2296	1	55	0	1	18.4775	79	0	0	5	4259	13	12	56.2	0	12	48.9	1.26455	198	5.12028	78	0.88062	4.8	28.964	1	2	86	4.77386	106.5	65.5	0	8.11791
15353	0	42	1	0	18.4786	60	0	0	0	906	14	17	43.2	0	10	71.4	1.8464	171	4.42206	58	0.65482	5.1	32.243	1	1	84	4.66284	98	66	0	7.79811
10018	0	33	0	0	18.4792	62.3	0	0	0	4005	12	14	47.9	0	8	48.7	1.25938	163	4.21518	101	1.14029	5	31.15	1	1	97	5.38447	110	68.5	0	8.49668
15363	0	39	0	0	18.4792	73.5	0	0	0	2542	18	21	47.9	0	10	66.5	1.71969	185	4.7841	45	0.50805	4.9	30.057	1	2	83	4.60733	119.5	82.5	0	7.53236
9305	0	40	0	0	18.4793	70	0	0	0	2246	10	17	46.6	0	12	61	1.57746	139	3.59454	16	0.18064	4.9	30.057	1	1	85	4.71835	94.5	64	0	6.52209
5577	0	42	0	0	18.4793	74.5	0	0	0	3289	16	18	46.6	0	9	72.1	1.86451	206	5.32716	29	0.32741	4.9	30.057	1	1	84	4.66284	105.5	70	0	7.10497
10602	0	37	1	0	18.4802	60.5	0	0	0	3291	8	18	49.1	0	10	55.6	1.43782	198	5.12028	22	0.24838	5	31.15	1	1	88	4.88488	100	66	0	6.87523
9397	0	45	36	0	18.4804	64.5	0	0	0	3611	14	13	48.5	0	9	52	1.34472	177	4.57722	71	0.80159	4.9	30.057	1	1	88	4.88488	97	60	0	8.04687
12497	0	52	0	0	18.4805	72.8	0	0	0	1479	23	22	48.8	0	17	73.7	1.90588	192	4.96512	68	0.76772	5.7	38.801	1	1	88	4.88488	123	72.5	0	8.0037
13041	0	35	1	0	18.4816	70	0	0	0	3229	12	18	42.7	0	11	55.2	1.42747	179	4.62894	40	0.4516	5	31.15	1	1	82	4.55182	106	67	0	7.40245
2331	1	57	0	0	18.4817	63.5	0	0	1	2612	19	15	46.9	1	13	71.5	1.84899	212	5.48232	43	0.48547	5.5	36.615	1	1	98	5.43998	107	68.5	0	7.65302
10724	0	51	0	0	18.4817	67	0	0	0	684	17	21	46.9	0	17	89.1	2.30413	248	6.41328	38	0.42902	5.452	36.0904	1	1	93	5.16243	113	68.5	0	7.47704
19960	0	31	1	0	18.4823	68	0	0	0	763	17	17	55.7	1	13	70	1.8102	171	4.42206	29	0.32741	5.2	33.336	1	1	92	5.10692	111	61.5	0	7.19594
11029	0	36	1	0	18.4832	59	0	0	0	721	14	13	46.2	0	8	59.9	1.54901	158	4.08588	25	0.28225	5.146	32.7458	1	1	92	5.10692	109.5	73.5	0	7.04752
9399	0	46	126	0	18.4837	65.7	0	0	0	1029	7	11	47.2	0	12	68.7	1.77658	231	5.97366	83	0.93707	4.9	30.057	2	3	108	5.99508	105	62	0	8.40782
12340	1	34	0	0	18.4837	70	0	0	1	2473	15	17	50.2	0	18	50.6	1.30852	253	6.54258	77	0.86933	5	31.15	1	3	94	5.21794	113	71.5	0	8.19395
11186	1	34	126	0	18.4843	72	0	0	1	338	25	16	58.5	0	30	40.1	1.03699	178	4.60308	90	1.0161	5.248	33.8606	2	3	94	5.21794	110.5	67.5	0	8.34996
9692	0	34	0	0	18.4862	71	0	0	0	365	9	13	46.5	0	7	77.7	2.00932	219	5.66334	37	0.41773	5.1	32.243	1	1	77	4.27427	93.5	61.5	0	7.26158
1987	0	34	1	0	18.4865	70	0	0	0	1070	12	16	49.6	0	12	68	1.75848	186	4.80996	30	0.3387	5.2	33.336	1	1	91	5.05141	113.5	66.5	0	7.21891
13519	0	29	0	0	18.4867	61	0	0	0	294	12	15	43.9	0	12	76.6	1.98088	206	5.32716	58	0.65482	4.9	30.057	1	1	83	4.60733	99.5	58.5	0	7.78614
15179	1	35	1	0	18.4879	66.5	0	0	1	267	15	15	50.7	0	11	57.7	1.49212	167	4.31862	33	0.37257	5.2	33.336	1	1	90	4.9959	110.5	67	0	7.30317
7102	0	35	0	0	18.4889	59.1	0	0	0	4074	13	12	41.6	0	10	41.3	1.06802	160	4.1376	48	0.54192	5.1	32.243	1	1	88	4.88488	97	60.5	0	7.65539
20752	0	46	35	0	18.4889	68	0	0	0	467	8	14	41.6	1	12	71	1.83606	190	4.9134	46	0.51934	5.3	34.429	1	1	87	4.82937	143	89.5	0	7.6014
2580	0	43	4.2	0	18.4923	63.8	0	0	0	4387	15	15	42.5	0	13	74.3	1.9214	283	7.31838	76	0.85804	5	31.15	1	1	87	4.82937	130.5	83.5	0	8.10349
16138	0	29	18	0	18.4923	68.5	0	0	0	2300	14	20	44.6	0	11	59	1.52574	192	4.96512	40	0.4516	5.2	33.336	1	1	95	5.27345	121	74.5	0	7.54961
9092	0	20	1	0	18.4925	63.8	0	0	0	1036	9	16	47.4	0	7	60	1.5516	182	4.70652	34	0.38386	4.7	27.871	1	3	85	4.71835	117	71	0	7.27586
10482	0	52	0	0	18.4938	64.8	0	0	0	2189	26	30	47.7	0	18	74.3	1.9214	230	5.9478	42	0.47418	5.4	35.522	1	1	104	5.77304	100.5	66	0	7.68891
19731	0	55	0	0	18.4948	67	0	0	0	721	12	16	48	0	13	72	1.86192	228	5.89608	96	1.08384	5.7	38.801	1	1	94	5.21794	108.5	55.5	0	8.4145
4255	0	40	1	0	18.4956	64.2	0	0	0	2904	10	21	45.3	1	10	51.6	1.33438	144	3.72384	16	0.18064	5.35	34.9755	1	1	79	4.38529	89	57.5	0	6.44889
11720	0	33	1	0	18.4975	59.5	0	0	0	3594	10	14	42.4	1	12	74.7	1.93174	200	5.172	30	0.3387	5.6	37.708	1	1	92	5.10692	94.5	64	0	7.22984
13444	0	35	0	0	18.4978	61	0	0	0	736	13	15	47	0	11	66.1	1.70935	138	3.56868	40	0.4516	5.4	35.522	1	1	94	5.21794	98.5	57	0	7.53903
13909	0	50	0	0	18.4988	68	0	0	0	2808	12	19	44.1	0	15	70.9	1.83347	245	6.3357	117	1.32093	5.4	35.522	1	1	79	4.38529	123.5	84.5	0	8.43847
19655	0	29	0	0	18.4998	65	0	0	0	693	11	17	46.3	0	8	79	2.04294	164	4.24104	24	0.27096	5.2	33.336	1	1	86	4.77386	106.5	63.5	0	6.93925
17550	1	35	5.13333	0	18.502	66	0	0	1	1462	21	24	50.8	0	12	57	1.47402	187	4.83582	51	0.57579	5.1	32.243	1	3	98	5.43998	115	71.5	0	7.82365
20094	0	59	0	1	18.5021	75	0	0	10	756	16	20	45.2	0	12	57	1.47402	195	5.0427	97	1.09513	5.3	34.429	1	1	86	4.77386	134	82.5	0	8.33591
20475	0	51	0	0	18.5028	66	0	0	0	364	12	19	42.3	0	18	70	1.8102	263	6.80118	97	1.09513	5.5	36.615	1	1	92	5.10692	108	64.5	0	8.40335
10581	0	34	196.56	0	18.5042	67.5	0	0	0	655	18	20	50.5	0	36	96	2.48256	209	5.40474	42	0.47418	5.4	35.522	3	1	84	4.66284	102	64	0	7.47534
2091	1	44	0	0	18.5079	65	0	0	1	3919	13	13	57.2	1	9	58.3	1.50764	160	4.1376	39	0.44031	4.7	27.871	1	1	88	4.88488	103	68	0	7.44775
7128	1	43	0	1	18.5081	70.8	0	0	5	879	25	15	54.5	0	26	53.9	1.39385	297	7.68042	95	1.07255	5.2	33.336	1	3	93	5.16243	96	58	0	8.39333
15305	0	36	0	0	18.5104	71.5	0	0	0	2661	8	13	48.1	0	11	69.6	1.79986	178	4.60308	41	0.46289	5.4	35.522	1	1	94	5.21794	101	60	0	7.56372
15152	0	39	0	0	18.5119	65	0	0	0	1911	16	17	46.8	0	11	62.9	1.62659	161	4.16346	24	0.27096	5	31.15	1	1	86	4.77386	111.5	66	0	6.93925
1821	1	53	105	0	18.5129	69.8	0	0	1	2298	24	18	52.5	1	21	42.3	1.09388	210	5.4306	234	2.64186	5.4	35.522	2	2	103	5.71753	129	88.5	0	9.3969
17732	0	30	0	0	18.514	66	0	0	0	1036	14	15	47.1	0	10	110	2.8446	211	5.45646	41	0.46289	5.4	35.522	1	1	95	5.27345	106	59	0	7.5743
13974	0	30	8.4	0	18.5142	66.5	0	0	0	1465	9	15	50.1	0	12	69.4	1.79468	163	4.21518	75	0.84675	4.9	30.057	1	1	83	4.60733	95.5	61	0	8.04318
15212	0	35	0	0	18.5156	67	0	0	0	2555	15	14	47.4	0	17	72.8	1.88261	177	4.57722	35	0.39515	4.9	30.057	1	1	79	4.38529	115	76.5	0	7.23165
13530	0	52	0	0	18.5167	65.5	0	0	0	1459	12	19	42.5	0	18	59.3	1.5335	177	4.57722	31	0.34999	5.4	35.522	1	3	81	4.49631	130.5	85.5	0	7.13529
12310	0	49	0	0	18.5169	68	0	0	0	1863	9	14	47.7	0	10	69.3	1.7921	201	5.19786	24	0.27096	5.7	38.801	1	1	96	5.32896	110	64.5	0	7.04925
3277	0	38	0	0	18.5171	71.5	0	0	0	2155	8	15	55.1	0	8	49.9	1.29041	207	5.35302	52	0.58708	5.7	38.801	1	1	89	4.94039	96.5	58	0	7.74673
15497	0	42	1	0	18.5174	70.5	0	0	0	2164	14	17	52.7	0	13	60.9	1.57487	177	4.57722	40	0.4516	4.8	28.964	1	1	82	4.55182	96.5	54.5	0	7.40245
480	0	45	1	0	18.5184	57	0	0	0	4313	9	15	41.5	0	5	75.1	1.94209	195	5.0427	19	0.21451	4.5	25.685	1	1	87	4.82937	76.5	43.5	0	6.7172
2482	0	40	0	0	18.5185	64.5	0	0	0	4677	10	13	50.6	0	7	69.3	1.7921	188	4.86168	58	0.65482	4.9	30.057	1	1	89	4.94039	92	61.5	0	7.85593
17420	0	45	87.5	0	18.5189	66	0	0	0	217	15	17	46.7	0	11	91	2.35326	218	5.63748	49	0.55321	4.9	30.057	2	3	89	4.94039	100.5	59	0	7.68731
20521	0	44	126	0	18.5202	70	0	0	0	371	9	6	46	0	16	68	1.75848	175	4.5255	34	0.38386	5	31.15	2	1	95	5.27345	98.5	58	0	7.38709
12657	0	45	12	0	18.5202	70	0	0	0	1030	10	13	46	0	17	68.7	1.77658	196	5.06856	28	0.31612	5.5	36.615	1	1	91	5.05141	98	63	0	7.14992
10949	0	36	0	0	18.5217	68	0	0	0	2121	11	12	51.1	0	9	74.6	1.92916	210	5.4306	69	0.77901	4.942	30.5161	1	1	85	4.71835	82.5	54	0	7.98361
18213	0	48	0	0	18.5217	70	0	0	0	1360	29	22	51.1	0	63	93	2.40498	197	5.09442	39	0.44031	5.6	37.708	1	1	88	4.88488	106	68.5	0	7.44775
20479	1	38	0	0	18.522	63	0	0	1	349	23	17	42.4	0	20	82	2.12052	192	4.96512	34	0.38386	5.1	32.243	1	3	107	5.93957	98.5	66.5	0	7.50604
9486	0	39	1	0	18.5228	62.4	0	0	0	2850	14	17	47.3	0	10	78.9	2.04035	201	5.19786	39	0.44031	5.4	35.522	1	1	95	5.27345	113	75	0	7.52429
6572	1	36	0	0	18.5231	64.2	0	0	1	4369	22	8	54.1	0	15	46.9	1.21283	191	4.93926	47	0.53063	5	31.15	1	2	95	5.27345	109	68.5	0	7.71088
5658	0	59	0	0	18.5233	61.4	0	0	0	1691	24	20	41.9	0	21	47.1	1.21801	287	7.42182	156	1.76124	5.7	38.801	1	1	88	4.88488	97	56.5	0	8.83405
317	0	50	1	0	18.5233	72.5	0	0	0	4098	21	18	45.6	0	7	40.1	1.03699	184	4.75824	121	1.36609	4.8	28.964	1	1	90	4.9959	124	82.5	0	8.60245
16457	0	58	0	0	18.5238	60	0	0	0	1422	25	24	39	0	20	67	1.73262	197	5.09442	58	0.65482	5.7	38.801	1	1	96	5.32896	109.5	73.5	0	7.93164
14711	1	32	18	0	18.5242	69.5	0	0	1	1939	17	15	58.1	0	14	26	0.67236	139	3.59454	56	0.63224	4.9	30.057	1	2	91	5.05141	116	70.5	0	7.84306
11414	0	29	1	0	18.5258	64.5	0	0	0	489	7	12	45.2	0	10	73.7	1.90588	155	4.0083	34	0.38386	4.33	23.8269	1	1	93	5.16243	89.5	63	0	7.36581
11712	0	43	1	0	18.5258	66	0	0	0	2968	18	21	45.2	0	14	69.5	1.79727	164	4.24104	16	0.18064	5.2	33.336	1	1	91	5.05141	94	61	0	6.5903
13544	0	40	12	0	18.5267	66	0	0	0	2924	15	21	50.5	0	17	77.4	2.00156	210	5.4306	25	0.28225	5.2	33.336	1	1	91	5.05141	105.5	67.5	0	7.03659
7871	1	39	154	0	18.5287	72.2	0	0	1	351	13	16	59.7	0	13	66.8	1.72745	167	4.31862	24	0.27096	4.5	25.685	3	3	88	4.88488	109.5	63.5	0	6.96224
6708	1	57	0	0	18.5303	66.7	0	0	1	372	29	14	49.9	0	14	54.7	1.41454	244	6.30984	74	0.83546	5.6	37.708	1	2	90	4.9959	93.5	59	0	8.11073
8459	0	56	0	0	18.5322	62.5	0	0	0	4222	28	22	45.1	1	15	77.9	2.01449	217	5.61162	58	0.65482	5.2	33.336	1	1	86	4.77386	109.5	71	0	7.82164
9676	0	40	1	0	18.5327	67.5	0	0	0	3346	10	12	49.3	0	9	54	1.39644	141	3.64626	17	0.19193	5.1	32.243	1	1	88	4.88488	117.5	69.5	0	6.6174
18456	0	35	2.8	0	18.5328	60	0	0	0	1107	20	17	41.2	0	12	83	2.14638	214	5.53404	57	0.64353	5	31.15	1	1	84	4.66284	112	64	0	7.78072
14621	0	59	87.5	0	18.5337	67	0	0	0	325	14	18	48.7	0	19	76.4	1.9757	234	6.05124	99	1.11771	5.4	35.522	2	1	96	5.32896	97	64	0	8.46632
8199	1	35	60	0	18.5351	67	0	0	1	4375	15	15	58.2	0	13	79.2	2.04811	219	5.66334	37	0.41773	4.4	24.592	1	1	89	4.94039	104	66.5	0	7.40641
7744	0	39	1	0	18.5357	66.8	0	0	0	4445	14	15	51.2	0	11	73.6	1.9033	204	5.27544	45	0.50805	4.6	26.778	1	2	86	4.77386	100.5	65.5	0	7.56786
14771	0	36	0	0	18.5372	67	0	0	0	2173	39	35	47.1	0	13	60.6	1.56712	167	4.31862	22	0.24838	5.4	35.522	1	1	84	4.66284	116.5	76.5	0	6.82871
10922	1	36	0	0	18.5386	68	0	0	1	3454	18	16	55.1	0	13	41	1.06026	147	3.80142	61	0.68869	5.248	33.8606	1	3	91	5.05141	102.5	59	0	7.92859
299	1	40	154	0	18.5386	69.4	0	0	1	1093	15	8	55.1	0	12	42.8	1.10681	154	3.98244	59	0.66611	5	31.15	3	3	88	4.88488	90.5	60.5	0	7.86173
16498	0	36	0	0	18.5386	65	0	0	0	1806	13	19	45	0	15	68	1.75848	208	5.37888	22	0.24838	4.8	28.964	1	1	94	5.21794	104.5	66.5	0	6.94119
8745	0	43	0	0	18.5396	61.8	0	0	0	4355	9	8	49.5	0	14	60.3	1.55936	216	5.58576	72	0.81288	5.1	32.243	1	1	89	4.94039	120.5	73	0	8.07216
20426	0	44	1	0	18.5414	71	0	0	0	335	10	14	48.6	0	18	68	1.75848	147	3.80142	37	0.41773	5.5	36.615	1	1	90	4.9959	111	66.5	0	7.41758
12329	1	35	12	0	18.5428	66	0	0	1	1126	14	18	51.9	0	16	80	2.0688	191	4.93926	54	0.60966	5.4	35.522	1	3	103	5.71753	133.5	77	0	7.93057
13383	1	51	154	0	18.5437	73.5	0	0	1	847	15	21	52.9	0	16	81.1	2.09725	198	5.12028	38	0.42902	4.9	30.057	3	3	87	4.82937	113	69	0	7.41035
1961	0	41	0	0	18.5449	63.5	0	0	0	1967	13	12	50	0	9	62.2	1.60849	186	4.80996	70	0.7903	4.7	27.871	1	1	80	4.4408	100	57.5	0	7.93737
15839	0	35	66	0	18.546	66	0	0	0	2183	16	17	47.3	0	12	55	1.4223	146	3.77556	32	0.36128	5.1	32.243	1	1	80	4.4408	93	63	0	7.15462
12645	0	42	1	0	18.5465	67.5	0	0	0	2036	7	17	42.4	0	9	48.1	1.24387	198	5.12028	39	0.44031	5.1	32.243	1	1	86	4.77386	94	61.5	0	7.42476
17816	0	39	1	0	18.5467	71	0	0	0	1527	6	10	50.8	0	10	81	2.09466	158	4.08588	34	0.38386	5	31.15	1	1	74	4.10774	103	48.5	0	7.13728
20257	1	35	18	0	18.5469	64	0	0	1	343	19	16	56.8	1	14	56	1.44816	170	4.3962	49	0.55321	5.3	34.429	1	1	89	4.94039	120.5	63.5	0	7.68731
4110	0	53	0	0	18.547	72	0	0	0	805	12	16	45.6	0	7	75.7	1.9576	174	4.49964	33	0.37257	5.758	39.4349	1	1	86	4.77386	114.5	58.5	0	7.25771
17863	1	34	0	0	18.5481	65	0	0	1	732	9	12	54.3	0	15	52	1.34472	112	2.89632	39	0.44031	4.6	26.778	1	1	88	4.88488	127	83	0	7.44775
11286	1	40	0	0	18.5482	67.5	0	0	1	310	10	12	52.6	0	9	45.2	1.16887	128	3.31008	75	0.84675	4.942	30.5161	1	1	99	5.49549	104.5	70	0	8.21946
5075	1	49	0	0	18.5486	71	0	0	1	3398	18	15	57	0	9	31.4	0.812004	139	3.59454	69	0.77901	4.9	30.057	1	1	77	4.27427	89	58.5	0	7.88476
15486	0	36	0	0	18.5491	66	0	0	0	2170	12	19	50.5	0	13	53	1.37058	165	4.2669	48	0.54192	5.4	35.522	1	3	91	5.05141	98.5	64.5	0	7.68891
3108	0	34	0	0	18.5493	65.4	0	0	0	733	20	18	46.6	0	8	58	1.49988	169	4.37034	36	0.40644	4.6	26.778	1	1	77	4.27427	92.5	60	0	7.23418
15157	0	26	0	0	18.5493	69	0	0	0	763	11	14	46.6	0	11	58.5	1.51281	179	4.62894	37	0.41773	4.8	28.964	1	2	89	4.94039	91.5	47	0	7.40641
6813	0	39	0	0	18.5515	67.8	0	0	0	3977	21	15	46.9	1	9	70.1	1.81279	151	3.90486	32	0.36128	5	31.15	1	1	85	4.71835	108.5	66	0	7.21524
5981	0	41	0	0	18.5525	57	0	0	0	4388	13	9	43.6	0	14	61.3	1.58522	199	5.14614	36	0.40644	4.8	28.964	1	3	80	4.4408	100	65.5	0	7.2724
13538	0	31	0	0	18.5536	70.5	0	0	0	2884	17	14	45.5	0	16	62.7	1.62142	178	4.60308	37	0.41773	5	31.15	1	1	90	4.9959	103	64.5	0	7.41758
3883	1	35	1	0	18.5561	68	0	0	1	737	13	10	58.2	0	19	53	1.37058	144	3.72384	64	0.72256	4.9	30.057	1	3	87	4.82937	105.5	65	0	7.93164
6103	0	45	0	0	18.5563	59.6	0	0	0	1058	8	18	46.5	0	8	62.6	1.61884	171	4.42206	24	0.27096	5.6	37.708	1	1	81	4.49631	106	68	0	6.87936
8575	0	35	1	0	18.557	66.8	0	0	0	4387	9	8	52.5	0	8	60.2	1.55677	200	5.172	49	0.55321	5	31.15	1	1	79	4.38529	97.5	65.5	0	7.56812
15685	0	54	0	0	18.557	78	0	0	0	2335	14	20	43.1	0	12	52.4	1.35506	222	5.74092	43	0.48547	5.1	32.243	1	1	94	5.21794	114.5	69	0	7.61135
14772	0	42	0	0	18.5577	66.5	0	0	0	561	13	17	44.7	0	13	62.8	1.62401	170	4.3962	27	0.30483	5.4	35.522	1	1	87	4.82937	108.5	63	0	7.0686
16855	1	43	54	0	18.5591	72	0	0	1	1834	16	24	60.6	0	28	79	2.04294	202	5.22372	32	0.36128	5.4	35.522	1	1	94	5.21794	114.5	71.5	0	7.31588
8356	0	35	1	0	18.5602	64.8	0	0	0	1147	8	9	45.4	1	9	64.4	1.66538	165	4.2669	41	0.46289	4.4	24.592	1	1	88	4.88488	107.5	67	0	7.49776
18814	0	42	18.2	0	18.5602	70.5	0	0	0	365	9	9	45.4	0	13	82	2.12052	173	4.47378	49	0.55321	5.5	36.615	1	1	88	4.88488	106	72.5	0	7.67601
827	1	62	4.2	0	18.5614	67.5	0	0	1	4607	21	19	52.7	0	13	48.7	1.25938	217	5.61162	62	0.69998	5.6	37.708	1	1	103	5.71753	80	53.5	0	8.06872
7742	0	23	0	0	18.5614	65.8	0	0	0	1526	11	15	52.7	0	6	51.7	1.33696	148	3.82728	46	0.51934	5.1	32.243	1	1	80	4.4408	95	61.5	0	7.51752
8316	0	36	0	0	18.5625	58.6	0	0	0	1089	18	14	41.1	0	11	54.1	1.39903	179	4.62894	88	0.99352	4.9	30.057	1	1	89	4.94039	99	61	0	8.27283
14584	0	32	0	0	18.5625	64.5	0	0	0	2226	17	15	41.1	0	14	51.4	1.3292	198	5.12028	48	0.54192	5.2	33.336	1	1	86	4.77386	122	60.5	0	7.6324
16927	0	40	0	0	18.5631	71	0	0	0	1138	15	13	53.9	1	22	62	1.60332	183	4.73238	77	0.86933	5.5	36.615	1	1	90	4.9959	110	68.5	0	8.15047
14776	0	34	1	0	18.5631	65	0	0	0	171	16	18	47.7	0	10	76.4	1.9757	226	5.84436	34	0.38386	5.2	33.336	1	1	93	5.16243	95.5	55.5	0	7.36581
13245	0	36	1	0	18.5631	69.5	0	0	0	2900	13	19	47.7	1	12	52.4	1.35506	132	3.41352	20	0.2258	5.1	32.243	1	1	81	4.49631	96	59	0	6.69703
11462	0	47	1	0	18.5633	64	0	0	0	3560	18	26	46.4	0	25	98.2	2.53945	257	6.64602	59	0.66611	5.248	33.8606	1	1	82	4.55182	123	81	0	7.79111
17466	0	60	0	0	18.5633	67	0	0	0	1440	25	27	49.2	0	20	115	2.9739	249	6.43914	58	0.65482	5.5	36.615	1	2	100	5.551	123	74	0	7.97247
5136	1	38	308	0	18.5634	68.9	0	0	1	4367	20	18	50.6	0	22	66.1	1.70935	191	4.93926	61	0.68869	4.7	27.871	4	2	92	5.10692	102.5	72.5	0	7.93952
4202	0	28	4.2	0	18.5634	66	0	0	0	1079	17	16	50.6	0	10	59.1	1.52833	182	4.70652	39	0.44031	4.5	25.685	1	1	79	4.38529	106	63	0	7.33986
17374	0	38	0	0	18.5639	66	0	0	0	1837	10	16	45.7	0	12	77	1.99122	167	4.31862	62	0.69998	4.9	30.057	1	1	88	4.88488	99	62.5	0	7.91132
9785	0	39	0	0	18.5643	61	0	0	0	4172	11	8	48.3	1	11	51	1.31886	180	4.6548	42	0.47418	5.1	32.243	1	1	86	4.77386	115.5	73.5	0	7.49887
17905	0	51	36	0	18.5643	65	0	0	0	1421	12	22	48.3	0	14	85	2.1981	224	5.79264	48	0.54192	5.5	36.615	1	1	97	5.38447	113	68.5	0	7.75276
8355	0	39	57	0	18.5643	62.4	0	0	0	4448	26	15	48.6	0	12	64.2	1.66021	197	5.09442	40	0.4516	4.8	28.964	1	1	81	4.49631	118.5	74.5	0	7.39018
19092	1	39	126	0	18.5651	74	0	0	1	1097	30	15	57.9	0	34	36	0.93096	141	3.64626	89	1.00481	5.2	33.336	2	3	101	5.60651	122.5	79	0	8.41061
1362	0	55	0	0	18.5657	58.8	0	0	0	4329	27	27	46.7	0	15	79.2	2.04811	212	5.48232	61	0.68869	5.4	35.522	1	1	97	5.38447	94.5	53	0	7.99244
20021	0	40	126	0	18.5672	65	0	0	0	677	7	13	41	0	14	110	2.8446	199	5.14614	37	0.41773	5.1	32.243	2	1	89	4.94039	100	60.5	0	7.40641
4197	0	41	90	0	18.5677	63.5	0	0	0	3661	12	16	47	0	6	78	2.01708	206	5.32716	34	0.38386	4.8	28.964	2	1	80	4.4408	106	69	0	7.21524
13678	1	39	18	0	18.5684	73	0	0	1	2959	16	20	58.7	1	19	66.2	1.71193	186	4.80996	42	0.47418	5.4	35.522	1	1	103	5.71753	110	70.5	0	7.67925
8074	1	49	10.2667	0	18.569	74	0	0	1	4346	13	14	58.9	0	11	67.9	1.75589	179	4.62894	40	0.4516	5.2	33.336	1	3	88	4.88488	102.5	66.5	0	7.47307
3705	0	50	0	0	18.5709	60	0	0	0	3214	18	20	44.1	0	15	56.3	1.45592	185	4.7841	46	0.51934	5.248	33.8606	1	1	95	5.27345	116.5	71.5	0	7.68937
18792	1	56	154	0	18.5712	67	0	0	1	746	10	11	49.1	0	34	108	2.79288	217	5.61162	45	0.50805	5.2	33.336	3	3	99	5.49549	142.5	85.5	0	7.70864
14420	1	35	252	0	18.5714	65.5	0	0	1	2539	20	21	47.9	0	21	50.3	1.30076	136	3.51696	15	0.16935	5.5	36.615	3	1	97	5.38447	118.5	74.5	0	6.58961
7022	0	38	54	0	18.5727	61.5	0	0	0	2967	12	12	46.6	1	9	55.7	1.4404	222	5.74092	45	0.50805	5.2	33.336	1	1	75	4.16325	95	63.5	0	7.431
20258	1	35	18	0	18.5738	66	0	0	1	357	11	16	53.3	0	12	61	1.57746	157	4.06002	63	0.71127	5.2	33.336	1	1	100	5.551	132.5	78	0	8.05516
13027	1	44	60	0	18.5739	72.5	0	0	1	3219	12	17	57.6	0	12	80	2.0688	217	5.61162	35	0.39515	5.2	33.336	1	2	96	5.32896	97	66	0	7.42655
800	0	57	0	0	18.5757	66	0	0	0	1098	12	15	43.2	0	10	55.6	1.43782	204	5.27544	35	0.39515	5	31.15	1	1	94	5.21794	106	65	0	7.4055
14659	0	62	1	0	18.5765	65	0	0	0	774	14	21	40.8	0	16	82.5	2.13345	234	6.05124	97	1.09513	5.4	35.522	1	1	90	4.9959	125.5	69	0	8.38137
4815	0	37	0	0	18.5771	69.5	0	0	0	4020	12	18	49.6	0	9	54.2	1.40161	156	4.03416	31	0.34999	4.9	30.057	1	1	86	4.77386	97.5	60.5	0	7.19519
7495	1	36	231	0	18.5776	66.8	0	0	1	2188	16	14	53.5	0	14	67.1	1.73521	174	4.49964	39	0.44031	4.9	30.057	3	2	88	4.88488	97.5	59	0	7.44775
4779	1	59	0	0	18.5791	67.6	0	0	1	4484	16	21	49	0	67	84.1	2.17483	219	5.66334	65	0.73385	5.4	35.522	1	3	91	5.05141	130	81	0	7.9921
8567	0	57	1	0	18.5793	69.5	0	0	0	4082	8	11	42.7	0	12	80.1	2.07139	267	6.90462	87	0.98223	5.2	33.336	1	1	98	5.43998	119	62	0	8.35773
9699	1	33	0	0	18.58	73.5	0	0	1	1125	17	12	60.4	0	10	54.1	1.39903	177	4.57722	42	0.47418	4.6	26.778	1	2	87	4.82937	99	59	0	7.51043
20033	0	29	0	0	18.5803	70	0	0	0	736	12	14	51.2	0	15	75	1.9395	231	5.97366	57	0.64353	5.1	32.243	1	3	92	5.10692	109.5	69.5	0	7.87169
4705	0	45	0	0	18.5809	60.4	0	0	0	4508	16	11	45.8	1	9	68.8	1.77917	191	4.93926	47	0.53063	5.4	35.522	1	1	81	4.49631	100.5	63.5	0	7.55145
4285	1	46	0	1	18.5823	70	0	0	5	4192	19	16	51.7	0	16	51.4	1.3292	190	4.9134	46	0.51934	5.4	35.522	1	2	96	5.32896	107	63.5	0	7.69984
12098	1	57	1	0	18.5823	64	0	0	1	735	16	18	54.4	0	11	92	2.37912	216	5.58576	30	0.3387	5.4	35.522	1	2	94	5.21794	114	64.5	0	7.25134
7783	0	22	0	0	18.5839	58.2	0	0	0	2885	12	15	45.4	0	6	67.7	1.75072	188	4.86168	59	0.66611	4.6	26.778	1	1	82	4.55182	87.5	47.5	0	7.79111
5492	0	49	1	0	18.5853	71.5	0	0	0	3755	12	16	47.4	0	9	54.4	1.40678	195	5.0427	70	0.7903	5.1	32.243	1	1	89	4.94039	106	61.5	0	8.04398
3048	0	56	0	0	18.5856	69.4	0	0	0	255	11	15	40.6	0	9	66.1	1.70935	242	6.25812	56	0.63224	5	31.15	1	1	99	5.49549	92.5	61.5	0	7.92732
14051	1	42	0	0	18.586	72.5	0	0	1	2919	25	28	64.3	0	17	71.3	1.84382	217	5.61162	57	0.64353	5.1	32.243	1	1	94	5.21794	124.5	80	0	7.8932
14161	0	45	1	0	18.587	60	0	0	0	2899	11	18	43	0	12	74	1.91364	182	4.70652	45	0.50805	5.2	33.336	1	1	88	4.88488	106	68.5	0	7.59085
1478	0	41	12	0	18.5909	62.6	0	0	0	3671	13	14	51.6	0	9	50.4	1.30334	152	3.93072	57	0.64353	5.1	32.243	1	1	92	5.10692	102.5	67.5	0	7.87169
9406	0	22	22	0	18.5917	66	0	0	0	1071	14	14	50.8	0	10	49.8	1.28783	155	4.0083	46	0.51934	5.1	32.243	1	1	80	4.4408	92	57	0	7.51752
18635	1	44	22	0	18.5923	68	0	0	1	1249	22	16	52.6	0	18	81	2.09466	251	6.49086	40	0.4516	5.2	33.336	1	1	81	4.49631	85	53.5	0	7.39018
10679	0	53	1	0	18.5926	64.6	0	0	0	3661	17	17	47.3	0	11	70.4	1.82054	203	5.24958	55	0.62095	5.146	32.7458	1	1	88	4.88488	105.5	67.5	0	7.79152
10988	0	52	1	0	18.5926	66.5	0	0	0	2165	13	15	47.3	1	15	67.3	1.74038	179	4.62894	30	0.3387	5.248	33.8606	1	1	79	4.38529	106	65.5	0	7.0775
20039	0	47	1	0	18.5926	70	0	0	0	728	12	16	47.3	0	13	75	1.9395	194	5.01684	51	0.57579	5.1	32.243	1	1	96	5.32896	94.5	53.5	0	7.80303
15341	1	29	108	0	18.5938	70	0	0	1	1996	16	19	57.4	0	16	46.6	1.20508	202	5.22372	104	1.17416	5.2	33.336	2	3	90	4.9959	103.5	58.5	0	8.45105
17092	0	40	88	0	18.5942	69.5	0	0	0	1717	14	21	51.3	0	14	101	2.61186	274	7.08564	71	0.80159	5.1	32.243	2	1	93	5.16243	111	68	0	8.10213
12886	0	42	0	0	18.5947	66.4	0	0	0	1761	12	17	48.8	0	11	75.6	1.95502	195	5.0427	20	0.2258	5	31.15	1	1	80	4.4408	100	67.5	0	6.68461
10967	0	35	36	0	18.595	61	0	0	0	1465	14	18	43.7	0	8	54.4	1.40678	153	3.95658	44	0.49676	4.942	30.5161	1	1	84	4.66284	108.5	68	0	7.52186
8417	0	35	0	0	18.595	64.5	0	0	0	1460	16	24	43.7	0	7	63	1.62918	176	4.55136	25	0.28225	5.1	32.243	1	3	88	4.88488	88	49	0	7.00307
13257	0	36	0	0	18.5959	66.5	0	0	0	2982	11	16	51.8	1	9	47.1	1.21801	166	4.29276	33	0.37257	5.8	39.894	1	3	95	5.27345	95	61.5	0	7.35724
15789	1	30	108	0	18.5964	68	0	0	1	2261	16	22	55.4	0	18	72	1.86192	204	5.27544	29	0.32741	5.5	36.615	2	2	86	4.77386	101	64	0	7.1285
16770	1	40	126	0	18.5964	71.5	0	0	1	1875	15	22	55.4	1	19	55	1.4223	190	4.9134	53	0.59837	5.1	32.243	2	3	94	5.21794	110	70	0	7.82044
10094	0	57	0	0	18.5971	59.5	0	0	0	328	13	20	45.2	0	12	67.9	1.75589	224	5.79264	52	0.58708	5.452	36.0904	1	1	85	4.71835	110.5	70.5	0	7.70075
15928	1	37	1	0	18.5975	69	0	0	1	2099	9	20	56.5	0	13	43	1.11198	170	4.3962	58	0.65482	5.4	35.522	1	2	89	4.94039	99.5	65.5	0	7.85593
11056	1	46	122.5	0	18.5988	72	0	0	1	3658	17	18	58.4	0	9	57.1	1.47661	153	3.95658	47	0.53063	5.146	32.7458	2	3	90	4.9959	109	72.5	0	7.65681
7150	0	49	0	0	18.6011	61.8	0	0	0	4672	16	17	42.3	1	9	68.3	1.76624	214	5.53404	39	0.44031	5.1	32.243	1	1	105	5.82855	107.5	63	0	7.62437
9042	0	46	0	0	18.6012	67	0	0	0	4361	15	22	47.5	0	8	100	2.586	272	7.03392	35	0.39515	5.5	36.615	1	1	85	4.71835	114	73.5	0	7.30485
13152	1	40	1	0	18.6021	69.8	0	0	1	2969	11	15	47.8	0	14	68.8	1.77917	215	5.5599	58	0.65482	5.1	32.243	1	3	90	4.9959	96	63	0	7.86711
8486	0	46	0	0	18.6033	58	0	0	0	1456	12	18	46.5	0	10	65.9	1.70417	220	5.6892	50	0.5645	5.2	33.336	1	3	81	4.49631	89	58	0	7.61332
11672	0	53	0	0	18.6038	70.6	0	0	0	345	18	20	42.7	1	15	60.9	1.57487	218	5.63748	43	0.48547	5.248	33.8606	1	1	95	5.27345	116	76.5	0	7.62193
5439	0	34	0	0	18.6046	68.4	0	0	0	4026	9	13	50.1	0	9	66.7	1.72486	141	3.64626	24	0.27096	4.6	26.778	1	1	91	5.05141	98.5	62	0	6.99577
1905	0	46	12	0	18.6064	60.5	0	0	0	3653	9	13	42.2	0	10	46.7	1.20766	211	5.45646	45	0.50805	5.2	33.336	1	1	90	4.9959	105	71	0	7.61332
7805	0	57	0	0	18.6064	69	0	0	0	1558	17	23	42.2	0	21	78	2.01708	207	5.35302	26	0.29354	5.2	33.336	1	3	87	4.82937	118.5	75	0	7.03086
5780	0	40	0	0	18.6072	58	0	0	0	4669	11	11	43.9	0	11	67.8	1.75331	213	5.50818	57	0.64353	5	31.15	1	1	83	4.60733	90	56	0	7.76874
20302	0	40	2.8	0	18.6072	62	0	0	0	392	13	15	43.9	0	15	67	1.73262	213	5.50818	36	0.40644	5.3	34.429	1	1	84	4.66284	99.5	59	0	7.32119
15412	0	43	90	0	18.6076	74	0	0	0	2194	16	21	46.1	0	12	63.6	1.6447	162	4.18932	30	0.3387	5	31.15	2	2	83	4.60733	103	64	0	7.12689
8738	0	42	36	0	18.6077	60	0	0	0	1570	13	11	45.4	0	11	60.2	1.55677	168	4.34448	59	0.66611	4.8	28.964	1	1	86	4.77386	111.5	70	0	7.83874
11614	1	35	238	0	18.6084	71	0	0	1	1084	15	16	50.6	0	26	68	1.75848	225	5.8185	69	0.77901	5.3	34.429	3	2	94	5.21794	108	62	0	8.08425
2154	1	54	392	0	18.6086	76	0	0	1	3676	11	15	53.4	0	17	77.1	1.99381	195	5.0427	60	0.6774	5.6	37.708	4	3	86	4.77386	104.5	68.5	0	7.85554
11071	1	56	1	0	18.6097	70	0	0	1	3017	7	12	52.9	0	14	49.5	1.28007	202	5.22372	40	0.4516	5.1	32.243	1	3	94	5.21794	122	80	0	7.53903
8734	0	37	1	0	18.6102	63.7	0	0	0	2798	13	10	48	0	12	85.8	2.21879	192	4.96512	52	0.58708	4.8	28.964	1	1	92	5.10692	115	68	0	7.77989
10077	0	44	0	0	18.6102	61.5	0	0	0	875	18	17	45	1	9	40.7	1.0525	154	3.98244	28	0.31612	5	31.15	1	2	84	4.66284	95.5	57	0	7.06987
16084	0	40	1	0	18.6108	65	0	0	0	2291	18	24	50.3	0	15	71	1.83606	213	5.50818	32	0.36128	5	31.15	1	1	79	4.38529	118.5	80.5	0	7.14204
1383	1	44	18	0	18.6123	67.2	0	0	1	3940	13	18	53.6	0	10	48.9	1.26455	214	5.53404	59	0.66611	4.8	28.964	1	2	93	5.16243	103	62	0	7.91699
7386	0	41	180	0	18.6132	63	0	0	0	374	13	18	51.6	0	9	56.5	1.46109	163	4.21518	100	1.129	4.9	30.057	3	3	78	4.32978	90	54.5	0	8.26873
2988	0	45	0	0	18.6144	63	0	0	0	2551	10	15	45.3	1	9	80.9	2.09207	224	5.79264	37	0.41773	5.4	35.522	1	1	77	4.27427	85.5	54.5	0	7.26158
13964	1	29	1	0	18.6162	72.5	0	0	1	1821	9	16	57.6	0	13	50.9	1.31627	191	4.93926	54	0.60966	4.8	28.964	1	1	86	4.77386	108	67	0	7.75018
12623	0	26	1	0	18.617	66.7	0	0	0	714	9	14	47.6	0	10	74.2	1.91881	278	7.18908	32	0.36128	5.4	35.522	1	1	84	4.66284	86.5	58.5	0	7.20341
14908	0	36	0	0	18.6181	68	0	0	0	2590	14	17	48.5	0	10	77.5	2.00415	168	4.34448	22	0.24838	5	31.15	1	1	89	4.94039	113	69.5	0	6.88653
6965	0	39	0	0	18.6181	69.7	0	0	0	3454	18	19	45.6	0	5	59.2	1.53091	156	4.03416	34	0.38386	5.4	35.522	1	1	86	4.77386	100	60	0	7.28756
4373	0	40	1	0	18.6193	61.7	0	0	0	4349	10	10	43.7	0	15	65	1.6809	160	4.1376	52	0.58708	4.9	30.057	1	1	90	4.9959	116.5	78	0	7.75791
3003	0	62	154	0	18.6193	72.5	0	0	0	718	13	19	43.7	0	13	55.5	1.43523	196	5.06856	75	0.84675	5.248	33.8606	3	3	91	5.05141	131	81	0	8.1352
17131	0	30	0	0	18.6222	65	0	0	0	986	19	25	41.9	0	16	50	1.293	134	3.46524	18	0.20322	5.1	32.243	1	1	80	4.4408	104	67.5	0	6.57925
16148	1	52	126	0	18.6226	69	0	0	1	799	12	20	55.8	0	28	74	1.91364	194	5.01684	50	0.5645	5.1	32.243	2	3	95	5.27345	112	73.5	0	7.77275
10723	0	32	40	0	18.6228	66	0	0	0	3818	14	15	42.8	0	7	65.8	1.70159	211	5.45646	43	0.48547	4.534	26.0566	1	1	82	4.55182	97.5	59	0	7.47477
2479	0	63	0	0	18.6233	63.8	0	0	0	1499	17	21	47.2	0	8	43.8	1.13267	160	4.1376	59	0.66611	5.7	38.801	1	1	96	5.32896	98.5	61	0	7.94874
13178	0	39	0	0	18.6245	66.5	0	0	0	2132	10	14	47.5	0	10	55.6	1.43782	268	6.93048	44	0.49676	5.5	36.615	1	1	104	5.77304	141	84	0	7.73543
7569	0	30	66	0	18.6253	65.5	0	0	0	3654	16	12	47.8	0	10	42.9	1.10939	178	4.60308	49	0.55321	4.7	27.871	1	3	103	5.71753	83	48.5	1	7.8334
828	0	57	0	0	18.6258	59.7	0	0	0	4607	17	18	42.3	0	10	70.6	1.82572	244	6.30984	38	0.42902	5.1	32.243	1	1	82	4.55182	102	70.5	0	7.35116
15509	1	45	378	0	18.6258	70	0	0	1	714	20	21	54.4	0	31	76.8	1.98605	197	5.09442	156	1.76124	4.7	27.871	4	3	89	4.94039	189	115	0	8.84535
11238	0	58	0	0	18.6258	67	0	0	0	3242	9	25	48.4	0	13	67	1.73262	240	6.2064	58	0.65482	5	31.15	1	1	96	5.32896	135.5	81.5	0	7.93164
9137	0	40	2.8	0	18.6268	68.8	0	0	0	4057	16	14	53.2	0	10	58.6	1.5154	153	3.95658	30	0.3387	5	31.15	1	1	88	4.88488	90.5	59.5	0	7.18539
12064	0	45	1	0	18.6268	62.4	0	0	0	3289	13	17	46.5	0	11	69.8	1.80503	193	4.99098	14	0.15806	5.8	39.894	1	1	82	4.55182	86.5	53	0	6.35263
12713	0	40	1	0	18.6268	69.5	0	0	0	3361	18	20	46.5	0	15	61.3	1.58522	175	4.5255	15	0.16935	5.7	38.801	1	3	89	4.94039	100	61.5	0	6.50354
12521	0	46	84	0	18.6277	71.2	0	0	0	3281	21	19	52.7	0	43	59.5	1.53867	197	5.09442	90	1.0161	5	31.15	2	1	91	5.05141	111	73.5	0	8.31752
5125	1	38	0	0	18.6277	67.2	0	0	1	4371	10	16	52.2	1	11	67.2	1.73779	162	4.18932	86	0.97094	4.7	27.871	1	2	86	4.77386	110	70	0	8.21555
11078	0	40	12	0	18.6277	70.5	0	0	0	3597	11	14	52.2	0	10	57.7	1.49212	173	4.47378	30	0.3387	5.248	33.8606	1	1	93	5.16243	91.5	50.5	0	7.24065
7408	0	43	18	0	18.6296	62.3	0	0	0	2657	10	14	44.7	0	12	81.1	2.09725	205	5.3013	79	0.89191	4.8	28.964	1	1	87	4.82937	107	70.5	0	8.14221
3373	0	35	0	0	18.6303	58.8	0	0	0	2355	11	12	43.1	0	6	54	1.39644	150	3.879	36	0.40644	4.8	28.964	1	1	94	5.21794	100	61	0	7.43367
18663	0	35	1	0	18.6316	61	0	0	0	1127	16	11	45.4	1	13	81	2.09466	165	4.2669	49	0.55321	5.1	32.243	1	1	80	4.4408	95	52.5	0	7.5807
3582	0	51	0	0	18.6319	65	0	0	0	322	15	18	47.4	0	11	64.7	1.67314	198	5.12028	54	0.60966	4.6	26.778	1	1	87	4.82937	102	63	0	7.76174
8896	0	50	0	0	18.6319	68.5	0	0	0	3359	14	14	47.4	0	10	44.7	1.15594	158	4.08588	25	0.28225	5.2	33.336	1	1	91	5.05141	83.5	49	0	7.03659
7603	0	42	0	0	18.6334	66	0	0	0	4137	12	14	50.3	0	11	54.7	1.41454	153	3.95658	30	0.3387	5.4	35.522	1	1	100	5.551	99.5	56	0	7.31322
3666	1	52	0	0	18.6344	68.5	0	0	1	730	15	16	55.9	0	13	54.9	1.41971	173	4.47378	47	0.53063	5.2	33.336	1	2	87	4.82937	130.5	83	0	7.62291
7920	0	47	0	0	18.6351	64	0	0	0	4012	11	11	45.7	0	12	67.1	1.73521	216	5.58576	48	0.54192	4.8	28.964	1	1	82	4.55182	107	64	0	7.58477
13217	0	41	84	0	18.636	63.5	0	0	0	2889	15	19	43	0	14	78.5	2.03001	189	4.88754	62	0.69998	5.6	37.708	2	1	85	4.71835	103.5	62.5	0	7.87664
18345	0	37	0	0	18.6361	66	0	0	0	1013	14	11	46.7	0	15	87	2.24982	156	4.03416	21	0.23709	5.2	33.336	1	1	85	4.71835	113.5	72.5	0	6.79403
6214	0	38	54.6	0	18.6367	68.2	0	0	0	4218	16	17	50.8	0	13	47.1	1.21801	182	4.70652	53	0.59837	5	31.15	1	1	84	4.66284	104.5	66	0	7.70796
1796	0	46	84	0	18.6383	66	0	0	0	778	11	22	46	0	23	56.6	1.46368	156	4.03416	44	0.49676	5	31.15	2	1	85	4.71835	89	55	0	7.53369
8988	0	40	0	0	18.6383	59.6	0	0	0	2213	14	17	45.3	0	10	76.4	1.9757	156	4.03416	62	0.69998	4.9	30.057	1	1	90	4.9959	99	66.5	0	7.9338
11921	0	30	0	0	18.6393	68.8	0	0	0	974	10	12	47.3	0	11	52.9	1.36799	186	4.80996	50	0.5645	5	31.15	1	1	80	4.4408	104.5	65	0	7.6009
19106	0	41	18	0	18.6393	73	0	0	0	1040	11	10	47.3	0	14	56	1.44816	174	4.49964	56	0.63224	5	31.15	1	1	88	4.88488	96.5	52.5	0	7.80954
7995	1	50	84	0	18.6394	72	0	0	1	2044	15	14	50.5	0	33	42.4	1.09646	186	4.80996	102	1.15158	5.1	32.243	2	3	91	5.05141	93.5	65	0	8.44269
16294	0	40	4.2	0	18.6407	69.5	0	0	0	1890	18	21	48.8	1	15	65	1.6809	177	4.57722	45	0.50805	5	31.15	1	2	85	4.71835	97.5	63	0	7.55617
18154	0	40	18	0	18.6407	65.5	0	0	0	1514	6	12	44.9	0	16	70	1.8102	220	5.6892	71	0.80159	5.7	38.801	1	1	92	5.10692	116.5	69.5	0	8.09132
12877	1	35	1	1	18.6408	71.3	0	0	5	362	20	17	52.8	0	13	47.5	1.22835	150	3.879	39	0.44031	5.5	36.615	1	2	95	5.27345	112.5	71.5	0	7.52429
9807	0	42	40.2	0	18.641	61.7	0	0	0	2785	8	9	47.9	0	9	56.5	1.46109	237	6.12882	75	0.84675	5.8	39.894	1	1	89	4.94039	91	56	0	8.11298
6688	1	56	198	1	18.641	74.5	0	0	5	1835	28	44	46.3	0	219	72.1	1.86451	156	4.03416	124	1.39996	4.9	30.057	3	3	104	5.77304	134.5	84.5	0	8.77153
20080	1	35	0	0	18.6411	66	0	0	1	766	15	19	54.7	0	15	63	1.62918	180	4.6548	33	0.37257	5.2	33.336	1	3	91	5.05141	115	59	0	7.31422
17949	1	63	154	0	18.6412	75	0	0	1	461	17	21	54	0	35	53	1.37058	173	4.47378	140	1.5806	5.5	36.615	3	3	86	4.77386	92	52.5	0	8.70284
560	0	49	0	0	18.6412	69	0	0	0	2035	12	19	48.2	1	12	47	1.21542	182	4.70652	85	0.95965	5.4	35.522	1	1	89	4.94039	92	56.5	0	8.23814
13994	0	39	0	0	18.6417	64.5	0	0	0	2657	15	20	42.9	0	12	69.5	1.79727	154	3.98244	31	0.34999	5.1	32.243	1	1	91	5.05141	112	73.5	0	7.2517
5412	1	40	60	0	18.6419	70	0	0	1	4275	14	12	56.7	0	25	51.2	1.32403	163	4.21518	32	0.36128	4.7	27.871	1	3	91	5.05141	117	76	0	7.28345
8898	0	48	0	1	18.6425	66.7	0	0	10	1128	15	13	44.5	1	14	50.1	1.29559	195	5.0427	71	0.80159	5.6	37.708	1	1	83	4.60733	112.5	72.5	0	7.98837
20024	1	35	1	0	18.6428	70	0	0	1	485	12	10	59.4	0	18	50	1.293	145	3.7497	87	0.98223	5.3	34.429	1	1	97	5.38447	121	59.5	0	8.34747
15275	0	56	0	0	18.6433	72	0	0	0	822	16	18	46.6	0	11	61.8	1.59815	218	5.63748	51	0.57579	5.6	37.708	1	1	86	4.77386	97	65	0	7.69303
4425	1	43	12	0	18.6435	67.5	0	0	1	4389	22	18	53.5	0	13	71.6	1.85158	234	6.05124	62	0.69998	5.5	36.615	1	2	101	5.60651	125.5	78	0	8.04911
9400	1	48	55	0	18.6441	67.8	0	0	1	366	28	18	55.8	1	32	79.1	2.04553	203	5.24958	39	0.44031	5.4	35.522	1	1	87	4.82937	96	61.5	0	7.43632
12093	0	47	18	0	18.6452	69.7	0	0	0	3284	15	17	50.7	0	11	69.1	1.78693	208	5.37888	38	0.42902	4.9	30.057	1	1	86	4.77386	118.5	69.5	0	7.39879
11737	0	57	0	0	18.6455	68	0	0	0	1116	11	19	49.6	0	11	62.3	1.61108	182	4.70652	38	0.42902	5.35	34.9755	1	1	89	4.94039	111	64	0	7.43308
19972	0	42	1	0	18.6467	64	0	0	0	757	17	19	47.2	0	14	70	1.8102	138	3.56868	37	0.41773	5.3	34.429	1	1	90	4.9959	132	80	0	7.41758
20808	0	55	0	0	18.6469	64	0	0	0	348	27	25	49.3	1	24	87	2.24982	211	5.45646	75	0.84675	5.3	34.429	1	1	87	4.82937	113	72.5	0	8.09025
15050	1	43	0	0	18.6482	69.5	0	0	1	567	19	19	56.2	1	11	49.1	1.26973	176	4.55136	32	0.36128	5	31.15	1	2	99	5.49549	119.5	75.5	0	7.36771
8915	0	37	84	0	18.6486	67.2	0	0	0	4539	16	16	47.8	0	8	75.5	1.95243	175	4.5255	41	0.46289	5	31.15	2	1	92	5.10692	103.5	65.5	0	7.54221
10943	0	47	22	0	18.6487	65	0	0	0	1184	19	17	45.5	1	13	63.4	1.63952	164	4.24104	32	0.36128	4.534	26.0566	1	1	83	4.60733	92.5	59.5	0	7.19143
9855	0	41	0	0	18.6493	68.5	0	0	0	3696	19	22	51.7	0	31	82.6	2.13604	191	4.93926	28	0.31612	4.942	30.5161	1	1	79	4.38529	90	57.5	0	7.00851
1795	0	48	0	0	18.6497	63.4	0	0	0	4036	8	14	43.6	0	8	64.3	1.6628	238	6.15468	46	0.51934	5.4	35.522	1	1	85	4.71835	89	56.5	0	7.57815
18986	1	30	4.2	0	18.6498	70.5	0	0	1	742	28	19	52.7	0	14	68	1.75848	184	4.75824	58	0.65482	5.4	35.522	1	1	92	5.10692	105	63	0	7.88908
2915	1	50	126	0	18.6515	74.5	0	0	1	1442	15	19	55.5	0	16	54.4	1.40678	157	4.06002	64	0.72256	4.9	30.057	2	2	101	5.60651	142	92.5	0	8.08086
3434	0	53	0	0	18.6516	63.8	0	0	0	4451	12	15	45.1	0	10	50.1	1.29559	190	4.9134	98	1.10642	5.1	32.243	1	1	93	5.16243	98	57.5	0	8.42442
11844	0	46	0	0	18.6516	72.5	0	0	0	3269	9	14	45.1	0	13	67.9	1.75589	219	5.66334	56	0.63224	5.5	36.615	1	1	105	5.82855	91	59	0	7.98616
1766	0	55	0	0	18.652	66.5	0	0	0	4407	18	23	49.8	1	16	91.4	2.3636	221	5.71506	51	0.57579	5.7	38.801	1	1	87	4.82937	95	56	0	7.70459
16769	0	37	0	0	18.6536	71	0	0	0	1819	8	15	49.5	0	12	59	1.52574	185	4.7841	16	0.18064	5	31.15	1	1	87	4.82937	124	78	0	6.54535
17531	0	25	0	0	18.6536	66	0	0	0	739	9	10	50.6	0	12	63	1.62918	154	3.98244	27	0.30483	5.4	35.522	1	1	93	5.16243	123	79.5	0	7.13529
11729	0	36	0	0	18.654	68.3	0	0	0	391	13	17	47.1	0	16	90.6	2.34292	237	6.12882	25	0.28225	4.534	26.0566	1	1	81	4.49631	124.5	78.5	0	6.92018
8399	1	35	1	0	18.6541	66.2	0	0	1	2555	15	13	51.9	0	10	45	1.1637	184	4.75824	57	0.64353	5.2	33.336	1	3	81	4.49631	100	60	0	7.74435
2797	1	40	0	0	18.6545	67.5	0	0	1	4403	22	17	52.4	0	14	69	1.78434	200	5.172	85	0.95965	5.1	32.243	1	3	96	5.32896	128.5	78.5	0	8.31385
9845	0	36	0	0	18.6565	66.5	0	0	0	4016	10	15	48.6	0	11	57.1	1.47661	196	5.06856	56	0.63224	4.7	27.871	1	1	88	4.88488	101.5	55.5	0	7.80954
11138	0	62	84	0	18.6583	77.5	0	0	0	3629	18	27	50	1	8	77.5	2.00415	181	4.68066	30	0.3387	5.248	33.8606	2	1	90	4.9959	127	76	0	7.20786
14723	1	30	90	0	18.6616	68.5	0	0	1	2564	16	19	56.5	0	11	59.4	1.53608	174	4.49964	63	0.71127	5	31.15	2	1	81	4.49631	123.5	74.5	0	7.84444
11454	1	36	1	0	18.6616	74	0	0	1	1113	19	19	56.5	0	8	58.7	1.51798	192	4.96512	93	1.04997	4.942	30.5161	1	1	89	4.94039	92	61	0	8.32809
432	0	58	0	0	18.6617	69.8	0	0	0	1130	15	14	49.4	1	9	57.5	1.48695	214	5.53404	102	1.15158	5.2	33.336	1	1	98	5.43998	117.5	74	0	8.51679
12578	0	45	0	0	18.6619	58	0	0	0	3338	9	16	43.8	0	11	57.4	1.48436	204	5.27544	38	0.42902	5.4	35.522	1	1	87	4.82937	88.5	56.5	0	7.41035
9450	0	31	0	0	18.662	63.3	0	0	0	3850	9	8	46	0	10	77.7	2.00932	192	4.96512	35	0.39515	4.6	26.778	1	1	85	4.71835	116	72	0	7.30485
8653	0	40	1	0	18.6627	62.1	0	0	0	3150	9	17	41.6	0	11	84.4	2.18258	220	5.6892	45	0.50805	5	31.15	1	1	80	4.4408	99.5	64.5	0	7.49554
14655	0	48	0	0	18.6629	66.5	0	0	0	2546	12	15	49.1	0	11	70.9	1.83347	213	5.50818	48	0.54192	5.1	32.243	1	1	87	4.82937	111	77.5	0	7.64396
9420	0	42	0	0	18.6676	64.6	0	0	0	4433	9	12	43.3	1	12	68.1	1.76107	234	6.05124	62	0.69998	5.7	38.801	1	1	90	4.9959	97	63	0	7.9338
3563	0	47	0	0	18.6676	67.5	0	0	0	4395	13	15	43.3	0	10	56	1.44816	180	4.6548	52	0.58708	5.1	32.243	1	1	91	5.05141	104	66.5	0	7.76896
9592	0	39	0	0	18.6678	67	0	0	0	4073	7	16	50.7	0	8	66	1.70676	184	4.75824	49	0.55321	5	31.15	1	1	83	4.60733	93	58.5	0	7.61751
2578	0	62	0	0	18.6687	69	0	0	0	1269	22	19	46.9	0	15	97	2.50842	345	8.9217	63	0.71127	5.9	40.987	1	1	106	5.88406	138	91.5	0	8.11343
19395	0	30	1	0	18.6705	67	0	0	0	693	11	15	50.4	0	11	79	2.04294	178	4.60308	20	0.2258	5	31.15	1	1	85	4.71835	88.5	51	0	6.74524
14897	1	60	0	0	18.6708	69.5	0	0	1	2286	17	18	55.3	1	14	54.4	1.40678	156	4.03416	50	0.5645	5	31.15	1	2	94	5.21794	112.5	73.5	0	7.76217
5851	0	34	1	0	18.6712	67	0	0	0	4028	17	16	47.5	0	13	47.4	1.22576	169	4.37034	20	0.2258	4.5	25.685	1	1	88	4.88488	98.5	61.5	0	6.77992
19139	0	39	1	0	18.6717	74	0	0	0	1107	11	9	48.7	0	12	74	1.91364	207	5.35302	35	0.39515	5.5	36.615	1	1	87	4.82937	112.5	71.5	0	7.32811
15705	0	38	9.50833	0	18.6721	68	0	0	0	2186	15	25	48.4	0	14	57	1.47402	209	5.40474	66	0.74514	5.4	35.522	1	1	82	4.55182	80.5	50	0	7.90323
49	0	50	60	0	18.6726	62.2	0	0	0	4422	15	13	45.5	1	13	58.5	1.51281	225	5.8185	75	0.84675	4.9	30.057	1	1	83	4.60733	120.5	72.5	0	8.04318
20488	1	34	0	0	18.6737	70	0	0	1	375	11	18	58.9	0	12	66	1.70676	216	5.58576	40	0.4516	5.1	32.243	1	1	92	5.10692	118	75	0	7.51752
17523	0	33	0	0	18.6741	64	0	0	0	649	22	24	43.6	0	11	75	1.9395	180	4.6548	19	0.21451	5.4	35.522	1	1	88	4.88488	94	61.5	0	6.72863
694	0	73	0	0	18.6756	62.4	0	0	0	371	30	28	39.7	0	14	56.6	1.46368	196	5.06856	54	0.60966	5.5	36.615	1	1	88	4.88488	123	75	0	7.77317
14775	0	40	0	0	18.676	67	0	0	0	1466	7	11	46.8	0	11	56	1.44816	172	4.44792	75	0.84675	5.6	37.708	1	1	79	4.38529	98	58	0	7.99379
15053	1	55	84	0	18.6763	68	0	0	1	338	18	25	50.6	0	13	71.4	1.8464	178	4.60308	63	0.71127	5.9	40.987	2	2	97	5.38447	105.5	69	0	8.0247
9754	0	38	0	0	18.6763	70	0	0	0	3982	14	16	50.6	0	9	47.8	1.23611	121	3.12906	14	0.15806	4.7	27.871	1	1	82	4.55182	99	59.5	0	6.35263
16239	0	60	0	0	18.6779	68	0	0	0	1450	19	24	44.7	1	15	85	2.1981	249	6.43914	40	0.4516	5.6	37.708	1	1	93	5.16243	116	75	0	7.52833
14055	0	60	54	0	18.6779	71	0	0	0	2485	12	20	44.7	1	12	84.3	2.18	216	5.58576	19	0.21451	4.9	30.057	1	1	77	4.27427	126	85	0	6.5951
19955	1	42	1	0	18.6788	66.5	0	0	1	850	11	18	57.4	1	11	80	2.0688	220	5.6892	41	0.46289	5.3	34.429	1	1	99	5.49549	103.5	59.5	0	7.61554
6537	1	47	126	0	18.6788	71.5	0	0	1	4366	8	13	57.4	0	8	47	1.21542	144	3.72384	23	0.25967	4.7	27.871	2	2	86	4.77386	105.5	65.5	0	6.89669
9026	0	45	1	0	18.6788	60	0	0	0	4425	19	20	46.1	1	6	103.6	2.6791	268	6.93048	37	0.41773	5.4	35.522	1	1	77	4.27427	84	52	0	7.26158
16333	0	24	1	0	18.6789	68.5	0	0	0	1820	10	17	54.3	0	11	61	1.57746	173	4.47378	53	0.59837	5.6	37.708	1	1	92	5.10692	114	70.5	0	7.79893
14658	1	46	54	0	18.6831	67	0	0	1	2690	14	20	56.5	1	22	94.1	2.43343	235	6.0771	59	0.66611	4.9	30.057	1	2	81	4.49631	116	70.5	0	7.77884
2111	1	42	308	0	18.6851	69.3	0	0	1	4352	18	15	54	0	70	66.5	1.71969	222	5.74092	92	1.03868	5	31.15	4	1	89	4.94039	127.5	81	0	8.31728
13715	0	36	8.16667	0	18.6869	63	0	0	0	2562	12	14	48.8	1	16	82.7	2.13862	224	5.79264	25	0.28225	5.4	35.522	1	2	87	4.82937	106.5	72	0	6.99164
3722	0	45	0	0	18.6869	75	0	0	0	1463	20	23	48.8	0	31	70	1.8102	244	6.30984	67	0.75643	5.2	33.336	1	3	94	5.21794	93	56	0	8.05484
9904	0	37	84	0	18.6873	63	0	0	0	2489	12	19	50.2	0	11	53.2	1.37575	143	3.69798	29	0.32741	4.7	27.871	2	2	91	5.05141	94	61.5	0	7.18501
19222	0	52	1	0	18.6877	62	0	0	0	998	17	20	48.2	0	14	112	2.89632	223	5.76678	32	0.36128	5.6	37.708	1	3	89	4.94039	87	60	0	7.26123
1000	0	44	0	0	18.6884	70	0	0	0	2688	21	25	46.3	0	85	77.6	2.00674	231	5.97366	77	0.86933	5	31.15	1	1	89	4.94039	102.5	66.5	0	8.13929
11409	0	51	40	0	18.6905	63	0	0	0	2522	12	15	46.6	0	9	99.9	2.58341	245	6.3357	41	0.46289	5.452	36.0904	1	1	96	5.32896	111.5	74.5	0	7.58477
20135	0	22	1	0	18.6913	60.5	0	0	0	707	8	14	49.6	0	11	80	2.0688	204	5.27544	56	0.63224	5.5	36.615	1	1	88	4.88488	117.5	68.5	0	7.80954
10214	0	35	1	0	18.692	72.4	0	0	0	2669	14	19	44.1	0	8	43.7	1.13008	147	3.80142	78	0.88062	5.1	32.243	1	2	87	4.82937	88	59	0	8.12947
12663	0	39	0	0	18.6921	64.8	0	0	0	3149	13	22	43.3	0	12	63.4	1.63952	181	4.68066	27	0.30483	4.7	27.871	1	1	81	4.49631	112	75.5	0	6.99714
6456	0	56	0	0	18.6928	61.5	0	0	0	347	19	22	41	0	9	63.5	1.64211	214	5.53404	52	0.58708	5	31.15	1	1	89	4.94039	90.5	57	0	7.74673
6738	0	35	0	0	18.6937	64	0	0	0	4099	23	15	47.2	1	12	63.7	1.64728	216	5.58576	48	0.54192	5.1	32.243	1	1	88	4.88488	111.5	69.5	0	7.65539
17989	0	38	54	0	18.694	63	0	0	0	1493	21	13	49	0	22	102	2.63772	164	4.24104	27	0.30483	5.5	36.615	1	1	89	4.94039	144	93	0	7.09133
9162	0	40	0	0	18.6948	60.7	0	0	0	4268	5	8	48.7	0	9	66.1	1.70935	146	3.77556	31	0.34999	5.2	33.336	1	1	92	5.10692	106.5	69	0	7.26263
7553	1	33	1	0	18.695	69.6	0	0	1	4382	43	29	59.7	0	12	60.9	1.57487	142	3.67212	17	0.19193	5.4	35.522	1	1	87	4.82937	121.5	78.5	0	6.60597
918	0	46	0	0	18.6952	68	0	0	0	4662	11	9	47.8	0	8	66.7	1.72486	198	5.12028	83	0.93707	5	31.15	1	1	97	5.38447	103.5	59.5	0	8.3004
16136	0	41	0	0	18.6955	70	0	0	0	1827	11	18	46.2	0	12	63	1.62918	184	4.75824	39	0.44031	4.7	27.871	1	1	87	4.82937	102	64	0	7.43632
14938	1	35	1	0	18.6971	69.5	0	0	1	2608	16	16	55.7	0	14	42.7	1.10422	174	4.49964	92	1.03868	5.1	32.243	1	1	102	5.66202	103	64.5	0	8.45361
16547	1	54	1	0	18.6984	69.5	0	0	1	1827	21	25	52.9	0	26	63	1.62918	160	4.1376	11	0.12419	4.8	28.964	1	1	76	4.21876	103	65	0	6.03548
14350	1	35	168	0	18.7001	72	0	0	1	1855	16	17	57.4	0	20	51.5	1.33179	175	4.5255	56	0.63224	5.4	35.522	3	2	96	5.32896	132	84.5	0	7.89655
2465	1	44	165	0	18.7022	71	0	0	1	4375	13	14	55.2	0	15	64.8	1.67573	179	4.62894	73	0.82417	4.9	30.057	3	2	89	4.94039	107	73	0	8.08595
4357	0	36	0	0	18.7026	60.5	0	0	0	725	10	10	46.1	0	14	83	2.14638	160	4.1376	62	0.69998	5.2	33.336	1	1	98	5.43998	126	83.5	0	8.01895
11319	1	43	90	0	18.7029	73.5	0	0	1	734	22	22	58	0	14	50.8	1.31369	213	5.50818	66	0.74514	5	31.15	2	1	100	5.551	130.5	82	0	8.10168
20007	0	40	27.3	0	18.7034	62	0	0	0	732	7	14	45.4	0	16	86	2.22396	179	4.62894	59	0.66611	5.5	36.615	1	1	88	4.88488	97.5	55.5	0	7.86173
9245	0	49	1	0	18.7037	62	0	0	0	3596	12	15	44.3	0	12	70.4	1.82054	190	4.9134	17	0.19193	5	31.15	1	1	96	5.32896	132	75	1	6.70441
1949	1	50	154	0	18.7046	76.5	0	0	1	3261	15	15	55.4	0	14	45.9	1.18697	195	5.0427	73	0.82417	4.8	28.964	3	3	88	4.88488	107	67.5	0	8.07465
17139	1	39	9.1	0	18.7047	71	0	0	1	300	40	30	58.6	0	27	72	1.86192	235	6.0771	39	0.44031	5.1	32.243	1	2	93	5.16243	97.5	64	0	7.50301
20620	1	39	0	0	18.7047	71	0	0	1	400	12	14	58.6	0	17	69	1.78434	184	4.75824	14	0.15806	5.4	35.522	1	2	88	4.88488	116	65.5	0	6.42325
20516	0	41	1	0	18.705	63	0	0	0	399	10	11	46.4	0	10	76	1.96536	173	4.47378	28	0.31612	5.2	33.336	1	1	92	5.10692	101.5	56.5	0	7.16085
16010	0	35	0	0	18.705	66	0	0	0	1495	17	24	46.4	0	14	57	1.47402	175	4.5255	49	0.55321	5.4	35.522	1	1	86	4.77386	98.5	60.5	0	7.65302
11670	1	42	1	0	18.7061	62.7	0	0	1	1420	12	17	53.3	1	11	51.7	1.33696	253	6.54258	61	0.68869	5.35	34.9755	1	2	91	5.05141	98	61.5	0	7.92859
18774	0	35	1	0	18.7061	76	0	0	0	1085	9	8	53.3	0	13	86	2.22396	211	5.45646	54	0.60966	5.1	32.243	1	1	92	5.10692	121	70	0	7.81763
5975	0	34	17.5	0	18.7063	64.2	0	0	0	2192	13	15	45	0	10	85.2	2.20327	160	4.1376	45	0.50805	5	31.15	1	1	82	4.55182	86.5	57.5	0	7.52023
8063	0	35	36	0	18.7063	67.8	0	0	0	3254	11	14	45	0	13	75.6	1.95502	184	4.75824	82	0.92578	5	31.15	1	2	78	4.32978	97	60	0	8.07028
9528	1	41	0	0	18.7067	67	0	0	1	4292	28	22	51.3	0	13	51.2	1.32403	153	3.95658	57	0.64353	5.1	32.243	1	3	81	4.49631	118.5	79.5	0	7.74435
6779	1	57	280	0	18.7068	75.5	0	0	1	4331	28	26	55.6	0	57	53.8	1.39127	168	4.34448	71	0.80159	4.8	28.964	4	3	86	4.77386	111.5	71	0	8.02388
16137	0	59	0	0	18.7078	72	0	0	0	808	16	22	51.8	0	15	70	1.8102	229	5.92194	36	0.40644	5.5	36.615	1	1	93	5.16243	102.5	67	0	7.42297
9583	0	31	0	0	18.7085	63.5	0	0	0	755	6	12	47	0	13	60.9	1.57487	163	4.21518	43	0.48547	4.9	30.057	1	1	83	4.60733	100.5	65.5	0	7.48689
5829	0	48	0	0	18.7085	67	0	0	0	677	16	21	47	0	27	56.7	1.46626	209	5.40474	63	0.71127	5.248	33.8606	1	1	88	4.88488	110.5	73	0	7.92732
11337	0	40	1	0	18.7097	64.2	0	0	0	3609	12	15	47.3	0	10	51.2	1.32403	152	3.93072	25	0.28225	4.33	23.8269	1	1	84	4.66284	97.5	59.5	0	6.95655
17303	0	30	1	0	18.7107	69.5	0	0	0	271	21	17	43.4	0	14	110	2.8446	184	4.75824	18	0.20322	4.9	30.057	1	1	89	4.94039	88	55	0	6.68586
3465	0	34	1	0	18.7107	57.5	0	0	0	4377	11	16	48.5	0	8	98.2	2.53945	248	6.41328	81	0.91449	5	31.15	1	1	87	4.82937	110.5	71	0	8.16721
1008	0	63	1	0	18.711	66	0	0	0	2348	13	26	48.2	0	11	51.9	1.34213	174	4.49964	101	1.14029	5.4	35.522	1	1	85	4.71835	100.5	64	0	8.36462
18182	0	47	1	0	18.7121	61	0	0	0	903	7	8	46.3	0	9	61	1.57746	151	3.90486	34	0.38386	5.2	33.336	1	1	90	4.9959	109.5	63.5	0	7.33302
17477	0	37	0	0	18.713	71.5	0	0	0	740	14	18	44.9	0	9	78	2.01708	240	6.2064	35	0.39515	5.4	35.522	1	1	92	5.10692	83	54	0	7.38399
8170	0	31	0	0	18.7143	62.5	0	0	0	3167	14	11	55.3	0	10	72.6	1.87744	228	5.89608	54	0.60966	5	31.15	1	1	100	5.551	108	67.5	0	7.90101
5677	1	32	1	0	18.7161	68.5	0	0	1	1132	13	13	59.3	0	14	39.2	1.01371	174	4.49964	44	0.49676	5	31.15	1	3	91	5.05141	96	59.5	0	7.6019
18716	1	39	90	0	18.7161	69	0	0	1	1166	13	18	59.3	0	18	72	1.86192	178	4.60308	47	0.53063	5.2	33.336	2	1	109	6.05059	126.5	79.5	0	7.84835
19763	1	40	8.4	0	18.7166	72	0	0	1	693	18	20	52.7	0	22	61	1.57746	237	6.12882	143	1.61447	5.3	34.429	1	1	103	5.71753	121.5	71.5	0	8.90443
13667	0	48	1	0	18.7171	72.5	0	0	0	2927	16	21	49	0	20	78.6	2.0326	228	5.89608	33	0.37257	5.2	33.336	1	1	92	5.10692	90	55.5	0	7.32515
284	0	55	0	0	18.7181	65.5	0	0	0	1353	20	17	47.5	0	10	50.6	1.30852	186	4.80996	58	0.65482	5.6	37.708	1	1	109	6.05059	115	71.5	1	8.05864
3745	0	37	0	0	18.7206	64.6	0	0	0	4418	13	14	45.5	0	8	40.7	1.0525	134	3.46524	42	0.47418	4.8	28.964	1	1	82	4.55182	88.5	55	0	7.45124
18464	1	35	0	0	18.7208	69	0	0	1	1059	11	10	55.9	0	12	64	1.65504	162	4.18932	26	0.29354	5.1	32.243	1	1	93	5.16243	110.5	71	0	7.09755
7514	1	63	308	0	18.7214	71.2	0	0	1	3491	13	23	51.9	1	27	86.1	2.22655	173	4.47378	60	0.6774	4.6	26.778	4	3	86	4.77386	138.5	85.5	0	7.85554
11786	1	40	54	0	18.7214	68.4	0	0	1	854	42	35	52.4	0	15	58.4	1.51022	192	4.96512	68	0.76772	4.7	27.871	1	3	93	5.16243	108	65	0	8.05896
6753	1	25	0	0	18.7215	69	0	0	1	4348	8	8	55	0	10	42.8	1.10681	185	4.7841	71	0.80159	5.1	32.243	1	3	91	5.05141	123.5	72.5	0	8.08039
14572	0	52	10.92	0	18.7218	71.5	0	0	0	1384	23	20	50.6	0	27	58.2	1.50505	236	6.10296	86	0.97094	5.5	36.615	1	1	91	5.05141	112.5	74.5	0	8.27206
5159	1	61	1	0	18.7225	70.8	0	0	1	1455	22	22	53.6	0	28	79.7	2.06104	246	6.36156	46	0.51934	4.9	30.057	1	2	82	4.55182	118.5	83.5	0	7.54221
11833	1	35	1	0	18.7228	64.7	0	0	1	3276	24	21	54.3	0	15	41.1	1.06285	140	3.6204	27	0.30483	4.7	27.871	1	3	88	4.88488	121	76.5	0	7.08003
9483	0	36	1	0	18.7237	66	0	0	0	4020	11	18	45.8	0	11	40.4	1.04474	154	3.98244	117	1.32093	5	31.15	1	1	94	5.21794	92.5	59.5	0	8.61232
18729	1	43	66	0	18.7242	69	0	0	1	357	26	9	58	0	26	68	1.75848	231	5.97366	74	0.83546	5.3	34.429	1	1	99	5.49549	123	76.5	0	8.20604
7369	0	41	0	0	18.7257	62.3	0	0	0	3650	11	12	47.4	0	10	74.8	1.93433	236	6.10296	98	1.10642	5.2	33.336	1	1	98	5.43998	139.5	91	0	8.47679
4959	1	29	2.8	0	18.7257	69.2	0	0	1	1920	27	24	54.5	0	13	54.8	1.41713	182	4.70652	81	0.91449	4.8	28.964	1	3	93	5.16243	130.5	78.5	0	8.2339
10848	0	38	1	0	18.726	65	0	0	0	3535	18	19	48.6	0	10	68	1.75848	172	4.44792	29	0.32741	5.1	32.243	1	1	92	5.10692	107.5	70	0	7.19594
6562	0	40	1	0	18.726	65.5	0	0	0	1827	13	15	48.6	0	12	60.3	1.55936	151	3.90486	15	0.16935	5.4	35.522	1	1	86	4.77386	104	62.5	0	6.46925
734	0	55	60	0	18.7264	67.7	0	0	0	2554	14	14	46.1	0	11	71.5	1.84899	188	4.86168	47	0.53063	4.6	26.778	1	1	79	4.38529	110	71.5	0	7.52645
11250	0	27	1	0	18.7266	62.5	0	0	0	2765	9	13	48	0	9	74.1	1.91623	197	5.09442	57	0.64353	4.84	29.4012	1	2	91	5.05141	117.5	71	0	7.86076
8960	0	50	0	0	18.7274	68.8	0	0	0	2270	13	17	50.8	1	8	52.9	1.36799	178	4.60308	57	0.64353	5.7	38.801	1	1	86	4.77386	102.5	64.5	0	7.80425
17698	0	43	0	0	18.7282	68	0	0	0	1438	7	13	53.3	0	11	71	1.83606	181	4.68066	35	0.39515	5.2	33.336	1	1	87	4.82937	113.5	73.5	0	7.32811
10382	0	55	0	1	18.7306	74.5	0	0	10	737	32	24	46.7	0	16	46.7	1.20766	197	5.09442	49	0.55321	5.5	36.615	1	1	96	5.32896	107	67	0	7.76302
18947	0	35	0	0	18.7306	67	0	0	0	1141	6	8	46.7	0	10	66	1.70676	179	4.62894	62	0.69998	5.2	33.336	1	1	96	5.32896	110.5	70	0	7.99834
14646	0	47	0	0	18.7335	70	0	0	0	2654	18	20	46	0	14	53	1.37058	147	3.80142	25	0.28225	5.2	33.336	1	1	84	4.66284	97.5	65	0	6.95655
4172	0	46	0	0	18.734	71.5	0	0	0	3114	9	14	47.6	1	8	59	1.52574	200	5.172	81	0.91449	5.2	33.336	1	1	78	4.32978	99.5	66.5	0	8.05801
4795	0	39	0	0	18.738	60.8	0	0	0	4406	15	15	51.2	1	8	65.8	1.70159	201	5.19786	74	0.83546	5.1	32.243	1	1	92	5.10692	101.5	60.5	0	8.13271
13392	0	36	84	0	18.7387	65	0	0	0	2098	16	17	42.5	1	13	93	2.40498	218	5.63748	30	0.3387	5.4	35.522	2	2	78	4.32978	92	56.5	0	7.06476
15154	0	38	0	0	18.7404	64	0	0	0	2722	11	19	42.9	0	9	66.3	1.71452	195	5.0427	41	0.46289	4.9	30.057	1	1	85	4.71835	114	74	0	7.46308
14831	0	34	0	0	18.7406	63.5	0	0	0	1843	18	17	45.9	0	11	79.6	2.05846	172	4.44792	17	0.19193	5.1	32.243	1	1	93	5.16243	104	66.5	0	6.67267
3060	0	58	1	0	18.7408	65	0	0	0	1038	10	18	47.2	0	7	34	0.87924	233	6.02538	97	1.09513	5.2	33.336	1	1	91	5.05141	81.5	51	0	8.39242
15225	0	33	0	0	18.7416	64	0	0	0	2596	15	17	47.5	0	13	42.3	1.09388	153	3.95658	42	0.47418	5.2	33.336	1	1	81	4.49631	91	59	0	7.43897
11439	1	31	1	0	18.743	72.8	0	0	1	3609	20	15	62.7	0	12	31.5	0.81459	145	3.7497	70	0.7903	5.146	32.7458	1	3	89	4.94039	94	60	0	8.04398
9121	0	44	0	0	18.7438	69.2	0	0	0	4400	14	12	52.4	0	11	69.3	1.7921	250	6.465	83	0.93707	5	31.15	1	1	87	4.82937	118.5	75	0	8.1916
8868	0	32	0	0	18.7443	61.5	0	0	0	350	10	16	42.4	1	12	117	3.02562	220	5.6892	21	0.23709	5.3	34.429	1	1	83	4.60733	88	48	0	6.77022
32	1	64	66	0	18.7444	74.5	0	0	1	1055	10	14	56.1	0	15	48.8	1.26197	197	5.09442	53	0.59837	4.8	28.964	1	2	89	4.94039	113	66.5	0	7.76578
18523	0	33	1	0	18.7468	73.5	0	0	0	727	13	18	51.1	0	12	65	1.6809	153	3.95658	33	0.37257	5	31.15	1	1	84	4.66284	106	63	0	7.23418
15661	0	34	12	0	18.7469	75	0	0	0	1842	18	22	60	1	14	60	1.5516	178	4.60308	25	0.28225	5.5	36.615	1	2	82	4.55182	98	65	0	6.93245
18204	0	52	0	0	18.7481	74	0	0	0	1455	16	14	51.6	0	13	81	2.09466	227	5.87022	57	0.64353	5.4	35.522	1	1	93	5.16243	125.5	81	0	7.8825
20340	0	55	1	0	18.7505	73	0	0	0	364	13	14	44.7	0	19	82	2.12052	249	6.43914	78	0.88062	5.7	38.801	1	1	103	5.71753	139	91	0	8.29829
4867	0	50	0	0	18.7515	61	0	0	0	4402	12	15	45.4	0	11	71.7	1.85416	192	4.96512	44	0.49676	5	31.15	1	3	86	4.77386	93.5	64.5	0	7.54539
18703	0	49	12	0	18.752	67	0	0	0	1124	19	21	49.7	1	16	67	1.73262	139	3.59454	36	0.40644	5.1	32.243	1	1	93	5.16243	115.5	74	0	7.42297
658	0	68	1	0	18.7524	57.8	0	0	0	1647	11	17	41.8	0	8	78.6	2.0326	240	6.2064	54	0.60966	5.6	37.708	1	1	79	4.38529	93.5	57	0	7.66528
15698	1	39	12	0	18.7531	67	0	0	1	1057	12	13	54.9	0	13	97	2.50842	207	5.35302	62	0.69998	5.2	33.336	1	1	84	4.66284	103.5	67.5	0	7.8648
2688	1	56	27.3	0	18.7537	72	0	0	1	500	22	25	61.1	0	10	37.4	0.967164	193	4.99098	100	1.129	4.9	30.057	1	1	89	4.94039	123.5	79	0	8.40066
13391	0	43	0	0	18.7547	68	0	0	0	2188	9	18	45	0	10	83	2.14638	252	6.51672	58	0.65482	5.2	33.336	1	1	82	4.55182	89	50	0	7.77402
7378	1	49	60	0	18.7555	70	0	0	1	3305	18	12	51	0	21	50.6	1.30852	205	5.3013	106	1.19674	4.7	27.871	1	3	98	5.43998	106	66	0	8.55526
5613	0	38	12	0	18.7558	68.8	0	0	0	2515	16	19	47	0	10	70.8	1.83089	157	4.06002	34	0.38386	4.8	28.964	1	1	82	4.55182	110.5	67	0	7.23993
4731	0	42	1	0	18.7569	63.5	0	0	0	4376	20	17	47.3	0	12	75.2	1.94467	175	4.5255	48	0.54192	5	31.15	1	1	84	4.66284	91	59	0	7.60887
246	1	56	252	0	18.7569	70	0	0	1	713	13	19	51.5	0	19	45	1.1637	179	4.62894	70	0.7903	4.8	28.964	3	3	88	4.88488	103.5	63	0	8.03268
13818	0	41	0	0	18.7573	67	0	0	0	2712	10	17	48.5	0	12	52.6	1.36024	192	4.96512	28	0.31612	5	31.15	1	1	96	5.32896	94.5	61.5	0	7.20341
8302	0	47	0	0	18.7577	59	0	0	0	4625	13	15	48.2	0	18	74.8	1.93433	250	6.465	64	0.72256	5.1	32.243	1	1	79	4.38529	94.5	64	1	7.83518
1849	0	58	12	0	18.7579	73.8	0	0	0	350	15	20	42.6	0	10	66.6	1.72228	201	5.19786	40	0.4516	5.452	36.0904	1	1	92	5.10692	91.5	59	0	7.51752
17692	1	40	54	0	18.7579	72	0	0	1	1456	20	13	55.3	0	16	66	1.70676	214	5.53404	133	1.50157	5.1	32.243	1	3	91	5.05141	88.5	59	0	8.70806
13602	0	34	0	0	18.7579	70.5	0	0	0	2973	11	16	55.3	0	10	51.6	1.33438	180	4.6548	37	0.41773	5	31.15	1	1	90	4.9959	106	66	0	7.41758
12353	0	36	54	0	18.7588	63	0	0	0	3115	11	18	50.7	1	13	64.8	1.67573	217	5.61162	15	0.16935	5.2	33.336	1	2	98	5.43998	96	59	0	6.59987
9914	0	43	1	0	18.7611	61	0	0	0	1836	11	11	42.1	0	6	81	2.09466	236	6.10296	16	0.18064	4.4	24.592	1	1	82	4.55182	118.5	77	0	6.48616
19895	0	62	12	0	18.7637	67	0	0	0	724	13	18	41.1	1	12	85	2.1981	234	6.05124	70	0.7903	5.2	33.336	1	1	87	4.82937	119	71.5	0	8.02126
931	0	44	0	0	18.7652	64.6	0	0	0	4445	13	18	48.4	0	9	53.3	1.37834	144	3.72384	27	0.30483	4.8	28.964	1	1	94	5.21794	104.5	69	0	7.14598
13	0	44	1	0	18.7652	72	0	0	0	4086	14	13	52.9	0	19	35.3	0.912858	184	4.75824	75	0.84675	4.9	30.057	1	3	91	5.05141	137	87.5	0	8.1352
15640	0	37	1	0	18.7667	67.5	0	0	0	755	11	16	49.8	0	11	75.7	1.9576	173	4.47378	31	0.34999	5.5	36.615	1	2	85	4.71835	99	63	0	7.18349
5797	1	61	60	0	18.7674	69.5	0	0	1	392	12	15	50.6	0	12	69.7	1.80244	227	5.87022	80	0.9032	4.9	30.057	1	2	103	5.71753	102	67	0	8.32361
18051	0	39	0	0	18.7674	67	0	0	0	372	8	11	50.6	0	10	53	1.37058	150	3.879	48	0.54192	5.2	33.336	1	1	86	4.77386	96.5	54.5	0	7.6324
3368	0	66	84	0	18.7687	71.6	0	0	0	3352	28	21	49.5	1	40	60.8	1.57229	237	6.12882	94	1.06126	5.2	33.336	2	1	91	5.05141	107	67	0	8.36101
1588	0	36	1	0	18.7703	62.5	0	0	0	728	8	9	49.2	1	7	63.7	1.64728	141	3.64626	39	0.44031	5.5	36.615	1	1	92	5.10692	105	63	0	7.4922
6964	0	43	0	0	18.7716	63.5	0	0	0	4373	10	10	48.9	0	10	57.5	1.48695	156	4.03416	43	0.48547	5.2	33.336	1	1	82	4.55182	104	65.5	0	7.47477
[truncated: 9,563 more rows]
